# Supplementary material for: Scandium alkyl and hydride complexes supported by a pentadentate diborate ligand: reactions with CO 2 and N 2 O
Source: Royal Society of Chemistry journal article supplement (doi:10.1039/c8dt03313g), 2018-01-01
Supplement: c8dt03313g1.pdf [file c8dt03313g1.pdf]

## Supporting Information

### Scandium Alkyl and Hydride Complexes Supported by a Pentadentate Diborate Ligand: Reactions with CO<sub>2</sub> and N<sub>2</sub>O

Daniel W. Beh,<sup>a</sup> Warren E. Piers,<sup>a\*</sup> Iker del Rosal,<sup>b</sup> Laurent Maron,<sup>b</sup> Benjamin S. Gelfand,<sup>a</sup>  
Chris Gendy<sup>a</sup> and Jian-Bin Li<sup>a</sup>

<sup>a</sup>Department of Chemistry, University of Calgary, 2500 University Drive NW,  
Calgary, Alberta, Canada T2N 1N4

<sup>b</sup>LPCNO, Université de Toulouse, INSA, UPS, LPCNO, 135 avenue de Ranguel, F-31077  
Toulouse, France, and CNRS, LPCNO, F-31077 Toulouse, France

#### Table of Contents

|                                                        |         |
|--------------------------------------------------------|---------|
| Experimental Details.....                              | S2-6    |
| Computational Details .....                            | S6-7    |
| Characterization Data.....                             | S7-30   |
| Cartesian Coordinates of all Optimized Structures..... | S31-S68 |

## Experimental Details

### General Considerations

Manipulation and storage of all oxygen and moisture sensitive materials was performed under an argon atmosphere in a MBRAUN glove box. Reactions were performed on a double manifold high vacuum line fitted with an OxisorBW scrubber (Matheson Gas products) argon purification cartridge, using standard techniques. Glassware was stored in a 135 °C oven prior to immediate transfer to the glovebox antechamber or assembly on the vacuum line and evacuated while hot. Tetrahydrofuran, toluene and pentane were dried and purified using a Grubbs/Down purification system,<sup>1</sup> and stored in evacuated 500 mL thick-walled vessels over sodium/benzophenone ketal. 1,4-Dioxane and C<sub>6</sub>D<sub>6</sub> were dried over sodium/benzophenone ketal, and HMDSO was dried over calcium hydride. All dried solvents were degassed, vacuum transferred prior to use into thick-walled glass vessels for storage over activated molecular sieves (4 Å). Li[*tol*-Pz<sub>4</sub>B<sub>2</sub>PyH],<sup>2</sup> ScCl<sub>3</sub>(THF)<sub>3</sub>,<sup>3</sup> LiCH<sub>2</sub>SiMe<sub>3</sub>,<sup>4</sup> LiCH<sub>2</sub>SiMe<sub>2</sub>Ph,<sup>5</sup> Li<sup>n</sup>Pr<sup>6</sup> and LiDBEt<sub>3</sub><sup>7</sup> were prepared according to literature procedures. Li<sup>i</sup>Bu was synthesized using the same procedure for LiCH<sub>2</sub>SiMe<sub>3</sub>. MeLi (1.6 M in Et<sub>2</sub>O), NaBHET<sub>3</sub> (1.0 M in toluene), LiHMDS, LiD, BEt<sub>3</sub>, HCOONa and NaOAc were purchased from Sigma-Aldrich and used as received. Solutions of MeLi, NaHBET<sub>3</sub> and LiDBEt<sub>3</sub> were evaporated *in vacuo* and stored in a glove box freezer at -35 °C. LiHMDS and B(C<sub>6</sub>F<sub>5</sub>)<sub>3</sub> were sublimed prior to use. CO<sub>2</sub> (Coleman Instrument grade, 99.99%) was purchased from Air Liquide and used as received. Nuclear magnetic resonance spectroscopy experiments including <sup>1</sup>H, <sup>2</sup>H, <sup>11</sup>B{<sup>1</sup>H}, <sup>13</sup>C{<sup>1</sup>H}, <sup>19</sup>F{<sup>1</sup>H}, <sup>1</sup>H-<sup>13</sup>C HMBC, <sup>1</sup>H-<sup>13</sup>C HSQC and DOSY were performed on Bruker-400, Ascend-500 or Avance-600 spectrometers. For DOSY experiments, the gradient amplitude was varied from 2% to 95% with an optimized δ (gradient pulse length) of 2600 μs and a Δ (diffusion time) of 0.075 s. All <sup>1</sup>H and <sup>13</sup>C{<sup>1</sup>H} NMR spectra were internally referenced relative to Si(CH<sub>3</sub>)<sub>4</sub> using residual solvent protons and naturally abundant <sup>13</sup>C resonances for all deuterated solvents. NMR spectra were processed and analyzed with MestReNova (v. 9.0.1-13254). X-ray crystallographic analyses were performed by Chris Gendy, Dr. Benjamin Gelfand, and Dr. Jian-Bin Li on a Nonius Kappa CCD diffractometer using graphite-monochromated Mo Kα radiation. Crystals were coated in Fomblin Y HVAC 140/13 oil. Elemental analyses were performed by Johnson Li using a Perkin Elmer Model 2400 Series II analyser at the Instrumentation Facility of the Department of Chemistry, University of Calgary. Solution high-resolution mass spectrometry (APCI-MS) measurements were performed by Wade White on samples prepared in the glove box in a gas tight syringe. Infrared spectra were collected on a Nicolet Avatar FT-IR spectrometer, and samples were prepared either as a KBr pellet or thin film by evaporation of a benzene solution on AgCl plates.

### Synthesis of 2-CH<sub>2</sub>SiMe<sub>3</sub>

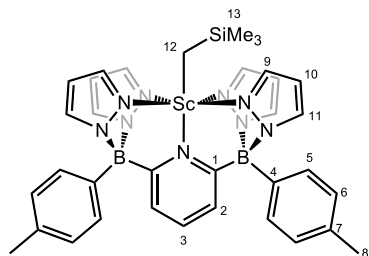

**1** (115 mg, 0.183 mmol) was reacted with LiCH<sub>2</sub>SiMe<sub>3</sub> (18 mg, 0.191 mmol, 1.05 equiv.) to yield **2-CH<sub>2</sub>SiMe<sub>3</sub>** as a pale yellow solid (68 mg, 0.100 mmol, 55%). Single crystals suitable for X-ray diffraction were obtained by layering HMDSO onto a concentrated solution of **2-CH<sub>2</sub>SiMe<sub>3</sub>** in benzene.

<sup>1</sup>H NMR (500 MHz, C<sub>6</sub>D<sub>6</sub>): δ 8.10 (d, <sup>3</sup>J<sub>HH</sub> = 2.2 Hz, 4H, H9), 7.78 (d, <sup>3</sup>J<sub>HH</sub> = 7.8 Hz, 4H, H5), 7.45 (d, <sup>3</sup>J<sub>HH</sub> = 2.2 Hz, 4H, H11), 7.39 (d, <sup>3</sup>J<sub>HH</sub> = 7.8 Hz, 2H, H2), 7.20 (d, <sup>3</sup>J<sub>HH</sub> = 7.7 Hz, 4H, H6), 6.72 (t, <sup>3</sup>J<sub>HH</sub> = 7.8 Hz, 1H, H3), 5.85 (t, <sup>3</sup>J<sub>HH</sub> = 2.2 Hz, 4H, H10), 2.32 (s, 6H, H8), 0.71 (s, 2H, H12), 0.21 (s, 9H, H13). <sup>13</sup>C{<sup>1</sup>H} NMR (126 MHz, C<sub>6</sub>D<sub>6</sub>): δ 172.2 (C1), 141.0 (C9), 140.7 (C4), 136.9 (C7), 136.5 (C11), 136.2 (C5), 134.5 (C3), 129.0 (C6), 127.4 (C2), 104.6 (C10), 42.3 (C12), 21.4 (C8), 3.8 (C13). <sup>11</sup>B NMR (161 MHz, C<sub>6</sub>D<sub>6</sub>) δ -0.01. Elemental Analysis: Calcd. (%) for C<sub>35</sub>H<sub>40</sub>B<sub>2</sub>N<sub>9</sub>ScSi: C, 61.69; H, 5.92; N, 18.50. Found: C, 60.74; H, 5.86; N, 18.10.

### Synthesis of 2-CH<sub>2</sub>SiMe<sub>2</sub>Ph

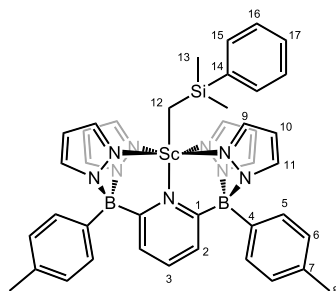

**1** (88 mg, 0.140 mmol) was reacted with LiCH<sub>2</sub>SiMe<sub>2</sub>Ph (23 mg, 0.147 mmol, 1.05 equiv.) to yield **2-CH<sub>2</sub>SiMe<sub>2</sub>Ph** as a pale yellow solid (80 mg, 0.108 mmol, 77%).

<sup>1</sup>H NMR (500 MHz, C<sub>6</sub>D<sub>6</sub>): δ 7.91 (d, <sup>3</sup>J<sub>HH</sub> = 2.0 Hz, 4H, H9), 7.80 – 7.75 (m, 6H, H5 and H15), 7.44 (d, <sup>3</sup>J<sub>HH</sub> = 2.2 Hz, 4H, H11), 7.38 (d, <sup>3</sup>J<sub>HH</sub> = 7.8 Hz, 2H, H2), 7.34 (m, 2H, H16), 7.30 – 7.26 (m, 1H, H17), 7.20 (d, <sup>3</sup>J<sub>HH</sub> = 7.7 Hz, 4H, H6), 6.70 (t, <sup>3</sup>J<sub>HH</sub> = 7.7 Hz, 1H, H3), 5.82 (t, <sup>3</sup>J<sub>HH</sub> = 2.2 Hz, 4H, H10), 2.32 (s, 6H, H8), 0.87 (s, 2H, H12), 0.29 (s, 6H, H13). <sup>13</sup>C{<sup>1</sup>H} NMR (126 MHz, C<sub>6</sub>D<sub>6</sub>): δ 172.2 (C1), 146.2 (C14), 141.1 (C9), 140.6 (C4), 136.9 (C7), 136.5 (C11), 136.2 (C5), 134.5 (C3), 134.2 (C15), 129.0 (C6), 128.2 (C17), 128.0 (C16), 127.3 (C2), 104.6 (C10), 38.3 (C12), 21.4 (C8), 2.3 (C13). <sup>11</sup>B NMR (161 MHz, C<sub>6</sub>D<sub>6</sub>) δ -0.05. Elemental Analysis: Calcd. (%) for C<sub>40</sub>H<sub>42</sub>B<sub>2</sub>N<sub>9</sub>ScSi: C, 64.62; H, 5.69; N, 16.96. Found: C, 64.16; H, 5.41; N, 16.31.

### Synthesis of 2-<sup>i</sup>Bu

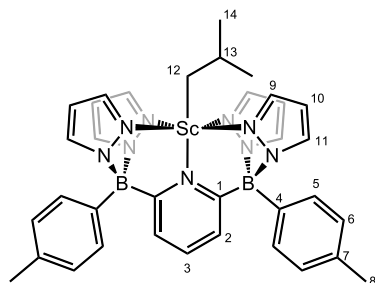

**1** (62 mg, 0.098 mmol) was reacted with Li<sup>i</sup>Bu (7 mg, 0.109 mmol, 1.11 equiv.) to yield **2-<sup>i</sup>Bu** as a pale yellow solid (40 mg, 0.060 mmol, 61%).

<sup>1</sup>H NMR (500 MHz, C<sub>6</sub>D<sub>6</sub>): δ 8.09 (d, <sup>3</sup>J<sub>HH</sub> = 2.1 Hz, 4H, H9), 7.77 (d, <sup>3</sup>J<sub>HH</sub> = 7.7 Hz, 4H, H5), 7.45 (d, <sup>3</sup>J<sub>HH</sub> = 2.3 Hz, 4H, H11), 7.39 (d, <sup>3</sup>J<sub>HH</sub> = 7.7 Hz, 2H, H2), 7.20 (d, <sup>3</sup>J<sub>HH</sub> = 7.7 Hz, 4H, H6), 6.73 (t, <sup>3</sup>J<sub>HH</sub> = 7.8 Hz, 1H, H3), 5.86 (t, <sup>3</sup>J<sub>HH</sub> = 2.2 Hz, 4H, H10),

2.50 (sept,  $^3J_{\text{HH}} = 6.5$  Hz, 1H, H13), 2.32 (s, 6H, H8), 1.19 (d,  $^3J_{\text{HH}} = 6.4$  Hz, 6H, H14), 1.17 (d,  $^3J_{\text{HH}} = 6.7$  Hz, 2H, H12).  $^{13}\text{C}\{^1\text{H}\}$  NMR (126 MHz,  $\text{C}_6\text{D}_6$ ):  $\delta$  172.3 (C1), 140.9 (C4), 140.7 (C9), 136.8 (C7), 136.5 (C11), 136.2 (C5), 134.4 (C3), 129.0 (C6), 127.3 (C2), 104.6 (C10), 64.6 (C12), 31.9 (C13), 29.6 (C14), 21.4 (C8).  $^{11}\text{B}$  NMR (161 MHz,  $\text{C}_6\text{D}_6$ )  $\delta$  0.08. Elemental Analysis: Calcd. (%) for  $\text{C}_{35}\text{H}_{38}\text{B}_2\text{N}_9\text{Sc}$ : C, 64.54; H, 5.88; N, 19.35. Found: C, 57.13; H, 4.71; N, 17.58.

### Synthesis of 2-<sup>n</sup>Pr

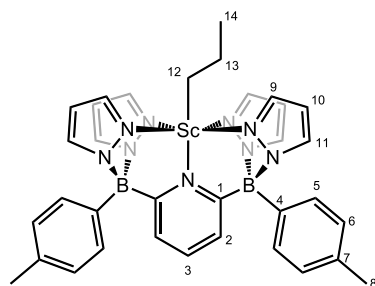

**1** (79 mg, 0.125 mmol) was reacted with  $\text{Li}^n\text{Pr}$  (7 mg, 0.140 mmol, 1.12 equiv.) to yield **2-<sup>n</sup>Pr** as an off-white solid (66 mg, 0.101 mmol, 81%).

$^1\text{H}$  NMR (500 MHz,  $\text{C}_6\text{D}_6$ ):  $\delta$  8.05 (d,  $^3J_{\text{HH}} = 2.1$  Hz, 4H, H9), 7.78 (d,  $^3J_{\text{HH}} = 7.9$  Hz, 4H, H5), 7.45 (d,  $^3J_{\text{HH}} = 2.3$  Hz, 4H, H11), 7.39 (d,  $^3J_{\text{HH}} = 7.8$  Hz, 2H, H2), 7.20 (d,  $^3J_{\text{HH}} = 7.7$  Hz, 4H, H6), 6.74 (t,  $^3J_{\text{HH}} = 7.8$  Hz, 1H, H3), 5.85 (t,  $^3J_{\text{HH}} = 2.2$  Hz, 4H, H10),

2.32 (s, 6H, H8), 2.06 (m, 2H, H13), 1.27 (t,  $^3J_{\text{HH}} = 7.1$  Hz, 3H, H14), 1.15 (m, 2H, H12).  $^{13}\text{C}\{^1\text{H}\}$  NMR (126 MHz,  $\text{C}_6\text{D}_6$ ):  $\delta$  172.3 (C1), 140.8 (C4), 140.6 (C9), 136.8 (C7), 136.4 (C11), 136.2 (C5), 134.5 (C3), 129.0 (C6), 127.3 (C2), 104.7 (C10), 55.0 (C12), 25.4 (C13), 22.5 (C14), 21.4 (C8).  $^{11}\text{B}$  NMR (161 MHz,  $\text{C}_6\text{D}_6$ )  $\delta$  -0.01. Elemental Analysis: Calcd. (%) for  $\text{C}_{34}\text{H}_{36}\text{B}_2\text{N}_9\text{Sc}$ : C, 64.08; H, 5.69; N, 19.78. Found: C, 62.73; H, 5.64; N, 19.05.

### Synthesis of tol-Pz<sub>4</sub>B<sub>2</sub>PyScD (2-D)

Same synthetic procedure as **2-H** but used  $\text{LiDBEt}_3$  instead of  $\text{NaHBEt}_3$ .

**1** (104 mg, 0.165 mmol) was reacted with  $\text{LiDBEt}_3$  (18 mg, 0.170 mmol, 1.03 equiv.) to yield **2-D** as a white solid (53 mg, 0.089 mmol, 54%).

$^2\text{H}$  NMR (77 MHz,  $\text{C}_6\text{H}_6$ )  $\delta$  9.16.

### Synthesis of tol-Pz<sub>4</sub>B<sub>2</sub>PyScOOCCH<sub>3</sub> (4-Me)

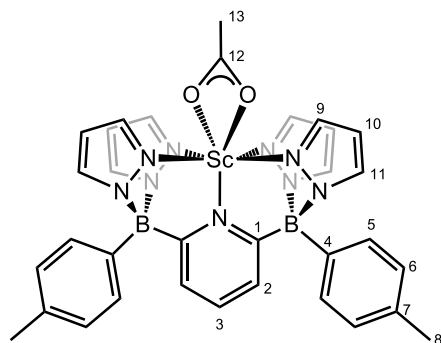

Method A: A J-Young NMR tube was charged with **2-Me** (10 mg, 0.017 mmol) and dissolved in  $\text{C}_6\text{D}_6$ . The colourless solution was degassed by freeze-pump-thaw at  $-78$  °C and backfilled with 1 atm of  $\text{CO}_2$ . The solution was heated to  $70$  °C for 2 hours to ensure complete formation of **2-Me**. Quantitative conversion by NMR.

Method B: A 50 mL thick-walled glass vessel equipped with a Kontes PTFE valve plug was charged with both **1** (125 mg, 0.199 mmol) and  $\text{NaOAc}$  (17 mg, 0.207 mmol, 1.04 equiv.). The apparatus was connected to the vacuum line and 20 mL of THF was vacuum transferred to the solid mixture at  $-78$  °C. The cloudy white mixture was heated to  $60$  °C for 24 hours after which the solvent was removed *in*

*vacuo*. The residue was extracted with 20 mL toluene and filtered through a 0.1  $\mu\text{m}$  PTFE syringe filter to remove NaCl and excess NaOAc. The filtrate was transferred into a 50 mL thick-walled glass vessel and subsequently evaporated *in vacuo* to yield a colourless residue. The residue was triturated and sonicated with 20 mL of pentane. The white suspension was then filtered through a medium porosity frit and washed with 2x3 mL of pentane. The product was isolated as a white solid and dried *in vacuo* (98 mg, 0.150 mmol, 76%). Single crystals suitable for X-ray diffraction were obtained by slow vapour diffusion of pentane onto a concentrated solution of **4-Me** in benzene.

$^1\text{H}$  NMR (500 MHz,  $\text{C}_6\text{D}_6$ ):  $\delta$  8.47 (d,  $^3J_{\text{HH}} = 2.1$  Hz, 4H, H9), 7.85 (d,  $^3J_{\text{HH}} = 7.7$  Hz, 4H, H5), 7.63 (d,  $^3J_{\text{HH}} = 7.7$  Hz, 2H, H2), 7.41 (d,  $^3J_{\text{HH}} = 2.3$  Hz, 4H, H11), 7.21 (d,  $^3J_{\text{HH}} = 7.7$  Hz, 4H, H6), 6.81 (t,  $^3J_{\text{HH}} = 7.7$  Hz, 1H, H3), 5.86 (t,  $^3J_{\text{HH}} = 2.2$  Hz, 4H, H10), 2.33 (s, 6H, H8), 1.82 (s, 3H, H13).  $^{13}\text{C}$  NMR (101 MHz,  $\text{C}_6\text{D}_6$ )  $\delta$  189.1 (C12), 173.4 (C1), 142.1 (C9), 141.0 (C4), 136.7 (C7), 136.4 (C11), 136.3 (C5), 134.3 (C3), 129.0 (C6), 127.3 (C2), 104.3 (C10), 22.4 (C13), 21.4 (C8).  $^{11}\text{B}$  NMR (161 MHz,  $\text{C}_6\text{D}_6$ )  $\delta$  -0.29.  $\nu_{\text{C-O}}$ : 1535  $\text{cm}^{-1}$ . Elemental Analysis: Calcd. (%) for  $\text{C}_{32}\text{H}_{30}\text{B}_2\text{N}_9\text{O}_2\text{Sc}$ : C, 60.67; H, 4.94; N, 19.30. Found: C, 61.83; H, 5.36; N, 18.05.

### Synthesis of [tol-Pz<sub>4</sub>B<sub>2</sub>PySc][MeCOOB(C<sub>6</sub>F<sub>5</sub>)<sub>3</sub>] (**5-Me**)

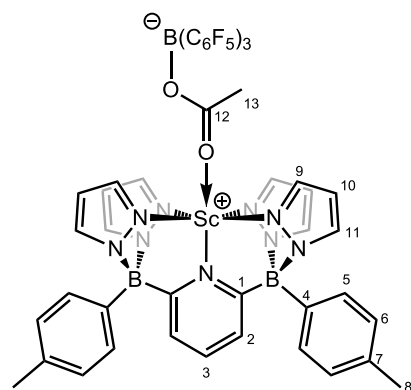

A 50 mL thick-walled glass vessel equipped with a Kontes PTFE valve plug was charged with **4-Me** (49 mg, 0.075 mmol) and  $\text{B}(\text{C}_6\text{F}_5)_3$  (40 mg, 0.078 mmol, 1.04 equiv.). 10 mL was added to dissolve the solids to give a colourless solution. The solution was stirred for 1 h after which the solvent was removed *in vacuo*. The resulting residue was triturated and sonicated with 20 mL of pentane. The white suspension was then filtered through a medium porosity frit and washed with 2x3 mL of pentane. The product was isolated as a white solid and dried *in vacuo* (83 mg, 0.071 mmol, 95%).

$^1\text{H}$  NMR (500 MHz,  $\text{C}_6\text{D}_6$ )  $\delta$  7.65 (d,  $^3J_{\text{HH}} = 8.0$  Hz, 4H, H5), 7.59 (d,  $^3J_{\text{HH}} = 2.2$  Hz, 4H, H9), 7.36 (d,  $^3J_{\text{HH}} = 2.3$  Hz, 4H, H11), 7.28 (d,  $^3J_{\text{HH}} = 7.8$  Hz, 2H, H2), 7.20 (d,  $^3J_{\text{HH}} = 7.7$  Hz, 4H, H6), 6.64 (t,  $^3J_{\text{HH}} = 7.8$  Hz, 1H, H3), 5.73 (t,  $^3J_{\text{HH}} = 2.3$  Hz, 4H, H10), 2.32 (s, 6H, H8), 1.59 (s, 3H, H13).  $^{13}\text{C}\{^1\text{H}\}$  NMR (126 MHz,  $\text{C}_6\text{D}_6$ )  $\delta$  183.1 (C12), 171.3 (C1), 148.6 (dm,  $^1J_{\text{CF}} = 240$  Hz,  $[\text{MeCO}_2\text{B}(\text{C}_6\text{F}_5)_3]$ ), 140.2 (dm,  $^1J_{\text{CF}} = 251$  Hz,  $[\text{MeCO}_2\text{B}(\text{C}_6\text{F}_5)_3]$ ), 139.9 (C9), 138.7 (C4), 137.5 (dm,  $^1J_{\text{CF}} = 262$  Hz,  $[\text{MeCO}_2\text{B}(\text{C}_6\text{F}_5)_3]$ ), 137.6 (C7), 137.5 (C11), 136.0 (C3), 135.7 (C5), 129.4 (C6), 128.2 (C2), 119.5 ( $[\text{MeCO}_2\text{B}(\text{C}_6\text{F}_5)_3]$ ), 105.4 (C10), 24.3 (C13), 21.3 (C8).  $^{11}\text{B}$  NMR (161 MHz,  $\text{C}_6\text{D}_6$ )  $\delta$  -0.20.  $^{19}\text{F}$  NMR (471 MHz,  $\text{C}_6\text{D}_6$ )  $\delta$  -135.45 (d,  $^3J_{\text{FF}} = 22.2$  Hz, *o*-F), -158.54 (t,  $^3J_{\text{FF}} = 20.9$  Hz, *p*-F), -165.24 (t,  $^3J_{\text{FF}} = 20.9$  Hz, *m*-F).  $\nu_{\text{C-O}}$ : 1571  $\text{cm}^{-1}$ . Elemental Analysis: Calcd. (%) for  $\text{C}_{51}\text{H}_{32}\text{B}_3\text{F}_{15}\text{N}_9\text{O}_2\text{Sc}$ : C, 52.57; H, 2.77; N, 10.82. Found: C, 5.25; H, 3.05; N, 10.51.

## References

1. Pangborn, A. B.; Giardello, M. A.; Grubbs, R. H.; Rosen, R. K.; Timmers, F. J. *Organometallics* **1996**, *15*, 1518 – 1520.
2. Nurdin, L.; Piers, W. E. **Unpublished Results**.
3. Hayes, P. G.; Piers, W. E. *Inorg. Synth.* **2010**, *35*, 20 – 24.
4. Vaughn, G. D.; Krein, K. A.; Gladysz, J. A. *Organometallics* **1986**, *5*, 936 – 942.
5. Emslie, D. J. H.; Piers, W. E.; Parvez, M.; McDonald, R. *Organometallics* **2002**, *21*, 4226 – 4240.
6. Withall, D. M.; Haynes, S. W.; Challis, G. L. *J. Am. Chem. Soc.* **2015**, *137*, 7889 – 7897.
7. Brown, H. C.; Krishnamurthy, S.; Hubbard, J. L. *J. Am. Chem. Soc.* **1978**, *100*, 3343 – 3349.
8. Matsuo, S.; Makita, T. *Int. J. Thermophys.* **1993**, *14*, 67 – 77.

## Computational Details

All DFT calculations were carried out with the Gaussian 09 suite of programs.[i] Geometries were fully optimized in gas phase without symmetry constraints, employing the B3PW91 functional. [ii] The nature of the extrema was verified by analytical frequency calculations. The calculation of electronic energies and enthalpies of the extrema of the potential energy surface (minima and transition states) were performed at the same level of theory as the geometry optimizations. IRC calculations were performed to confirm the connections of the optimized transition states. Scandium atoms were treated with Stuttgart effective core potential and their associated basis set. [iii] For the other elements (H, C, O, N and B), Pople's double- $\zeta$  basis set 6-31G(d,p) was used. [iv]

## Computational References

- [i] Gaussian 09, Revision D.01, Frisch, M. J.; Trucks, G. W.; Schlegel, H. B.; Scuseria, G. E.; Robb, M. A.; Cheesman, J. R.; Scalmani, G.; Barone, V.; Mennucci, B.; Petersson, G. A.; Nakatsuji, H.; Caricato, M.; Li, X.; Hratchian, H. P.; Izmaylov, A. F.; Bloino, J.; Zheng, G.; Sonnenberg, J. L.; Hada, M.; Ehara, M.; Toyota, K.; Fukuda, R.; Hasegawa, J.; Ishida, M.; Nakajima, T.; Honda, Y.; Kitao, O.; Nakai, H.; Vreven, T.; Montgomery, J. A., Jr.; Peralta, J. E.; Ogliaro, F.; Bearpark, M.; Heyd, J. J.; Brothers, E.; Kudin, K. N.; Staroverov, V. N.; Kobayashi, R.; Normand, J.; Raghavachari, K.; A., R.; Burant, J. C.; Iyengar, S. S.; Tomasi, J.; Cossi, M.; Rega, N.; Millam, M. J.; Klene, M.; Knox, J. E.; Cross, J. B.; Bakken, V.; Adamo, C.; Jaramillo, J.; Gomperts, R.; Stratmann, R. E.; Yazyev, O.; Austin, A. J.; Cammi, R.; Pomelli, C.; Ochterski, J. W.; Martin, R. L.; Morokuma, K.; Zakrzewski, V. G.; Voth, G. A.; Salvador, P.; Dannenberg, J. J.; Dapprich, S.; Daniels, A. D.; Farkas, O.; Foresman, J. B.; Ortiz, J. V.; Cioslowski, J.; Fox, D. J., Gaussian Inc., 2009, Wallingford CT
- [ii] Becke, A. D. Density-Functional Thermochemistry. III. The Role of Exact Exchange. *J. Chem. Phys.* **1993**, *98*, 5648 – 5652 and references therein; (b) Burke, K.; Perdew, J. P.; Yang,

W. Electronic Density Functional Theory: Recent Progress and New Directions; Plenum: New York, 1998.

[iii] (a) Dolg, M.; Wedig, H.; Stoll, H.; Preuss, H. Energy-adjusted *ab initio* pseudopotentials for the first row transition elements, *J. Chem. Phys.* **1987**, *86*, 866 – 872; (b) Martin, J. M. L.; Sundermann, A. Correlation consistent valence basis sets for use with the Stuttgart–Dresden–Bonn relativistic effective core potentials: The atoms Ga–Kr and In–Xe, *J. Chem. Phys.* **2001**, *114*, 3408 – 3420.

[iv] (a) Hariharan, P. C.; Pople, J. A. The Influence of Polarization Functions on Molecular Orbital Hydrogenation Energies. *Theor. Chem. Acc.* **1973**, *28*, 213 – 222. (b) Hehre, W. J.; Ditchfield, R.; Pople, J. A. Self-Consistent Molecular Orbital Methods. XII. Further Extensions of Gaussian-Type Basis Sets for Use in Molecular Orbital Studies of Organic Molecules. *J. Chem. Phys.* **1972**, *56*, 2257 – 2261.

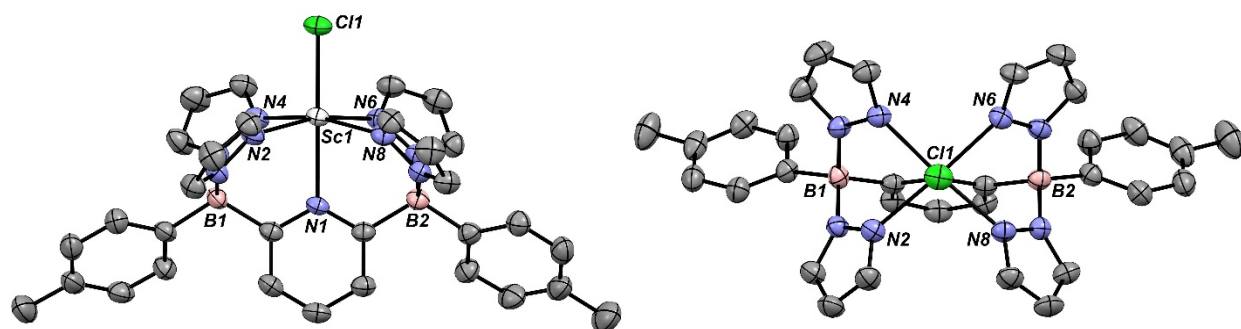

**Figure S1.** Molecular structure of **1**, front view (left) and top view (right). Hydrogen atoms have been omitted for clarity. Thermal ellipsoids are shown at the 50% probability level. Selected bond lengths (Å) and angles (°): Sc1–N1, 2.306(3); Sc1–N2, 2.224(4); Sc1–N4, 2.183(3); Sc1–N6, 2.197(4); Sc1–N8, 2.213(3); Sc1–Cl1, 2.396(1); N2–Sc1–N8, 98.60(14); N2–Sc1–N4, 83.78(14); N4–Sc1–N6, 91.55(13); N6–Sc1–N8, 82.93(13).

## NMR Spectra

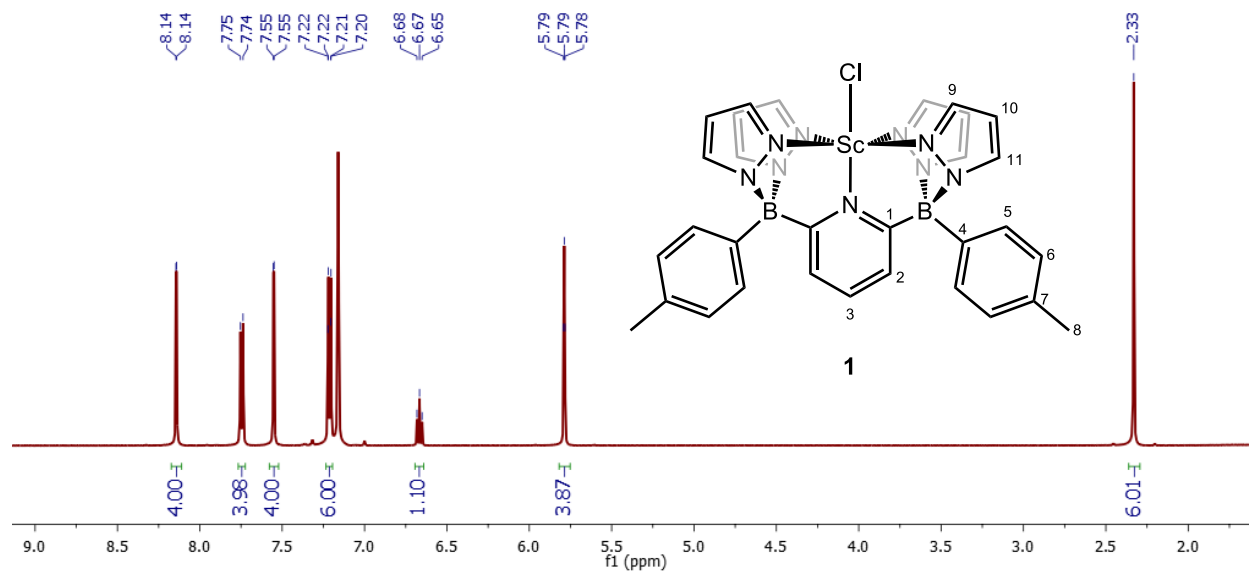

**Figure S2.**  $^1\text{H}$  NMR spectrum of **1** in  $\text{C}_6\text{D}_6$ .

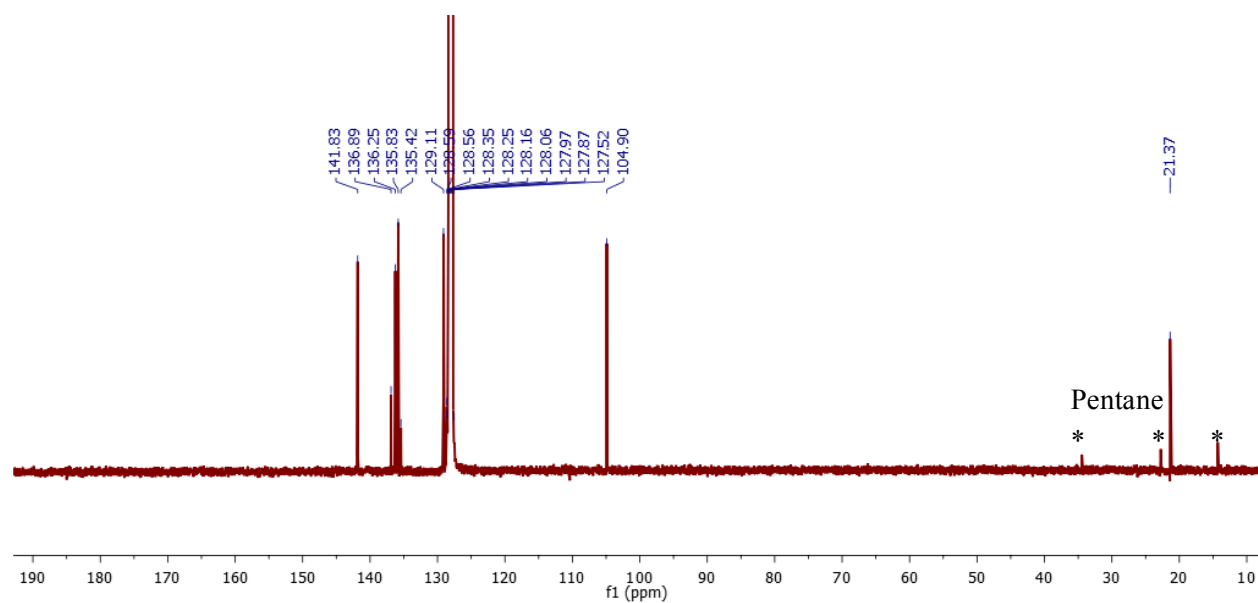

**Figure S3.**  $^{13}\text{C}\{^1\text{H}\}$  NMR spectrum of **1** in  $\text{C}_6\text{D}_6$ .



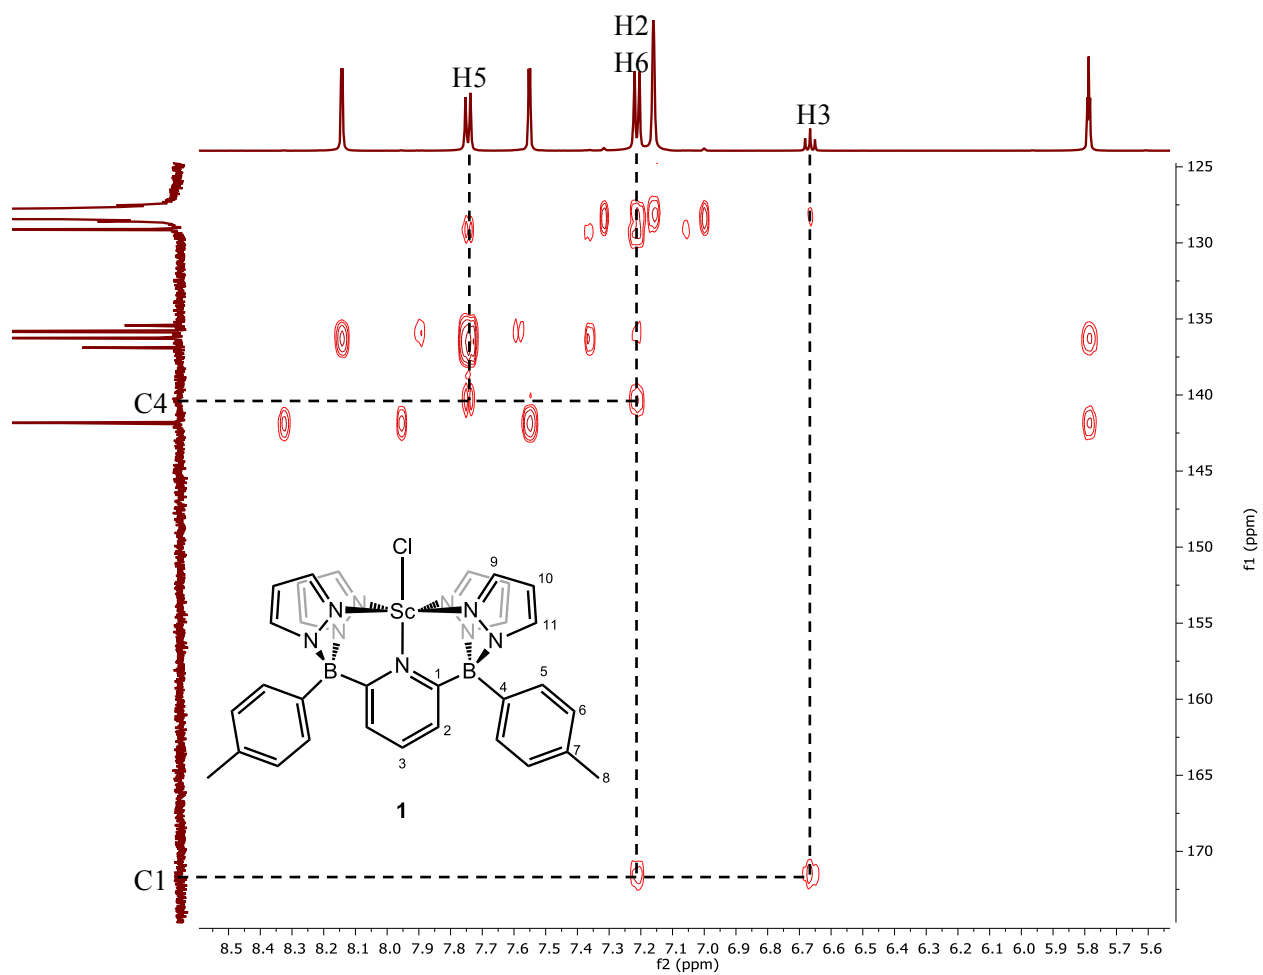

**Figure S4.**  $^1\text{H}$ - $^{13}\text{C}$  HMBC NMR spectrum of **1** for the determination of C1 and C4.

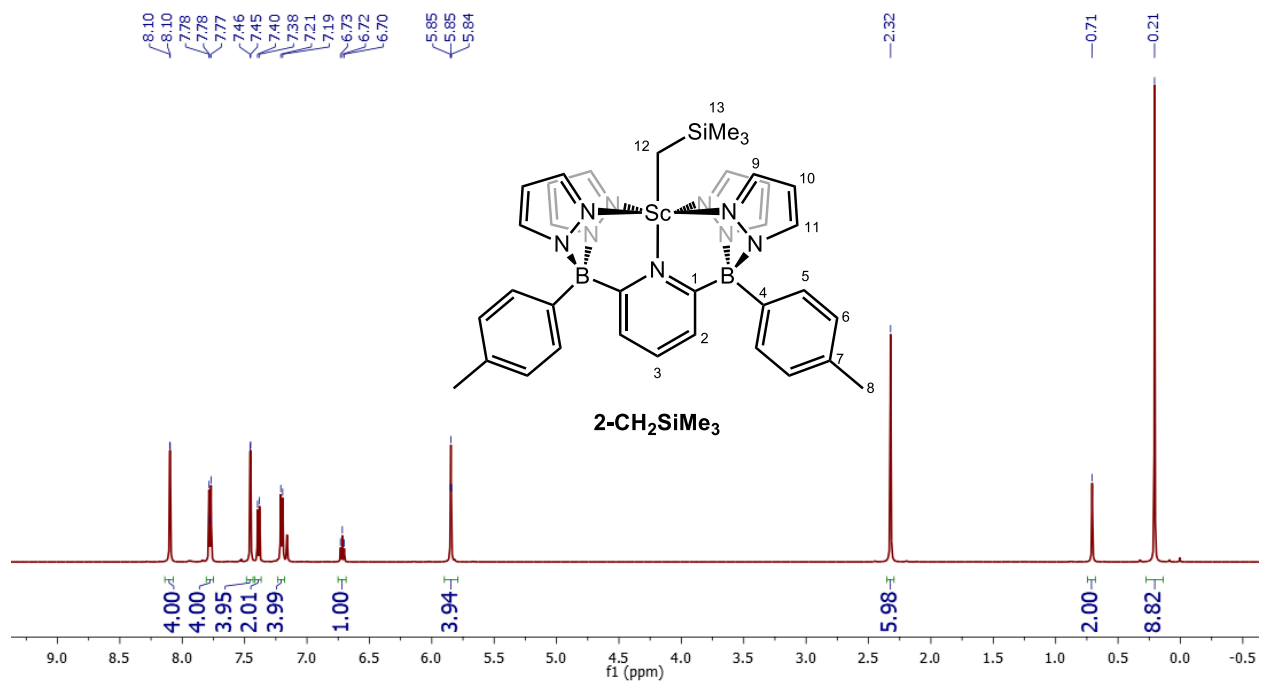

**Figure S5.** <sup>1</sup>H NMR spectrum of **2-CH<sub>2</sub>SiMe<sub>3</sub>** in C<sub>6</sub>D<sub>6</sub>.

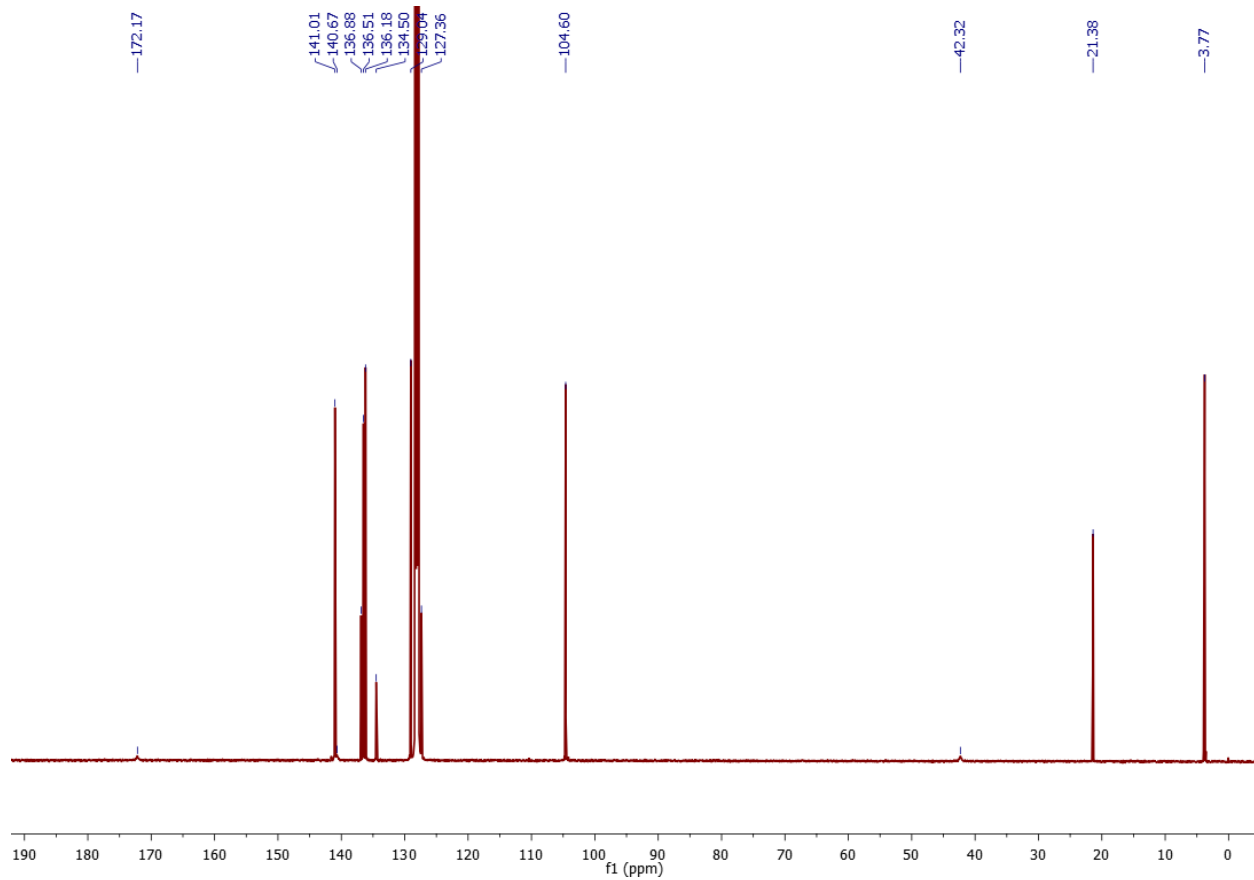

**Figure S6.** <sup>13</sup>C{<sup>1</sup>H} NMR spectrum of **2-CH<sub>2</sub>SiMe<sub>3</sub>** in C<sub>6</sub>D<sub>6</sub>.

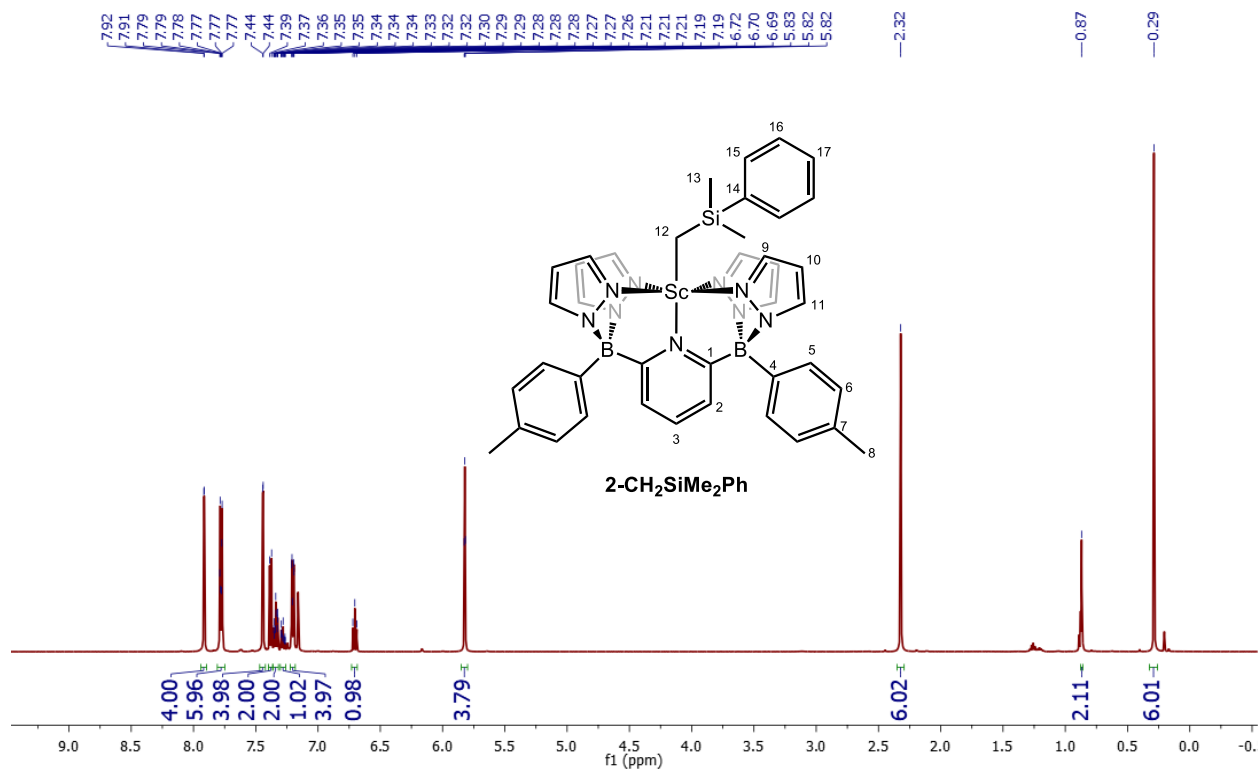

**Figure S7.**  $^1\text{H}$  NMR spectrum of **2-CH<sub>2</sub>SiMe<sub>2</sub>Ph** in  $\text{C}_6\text{D}_6$ .

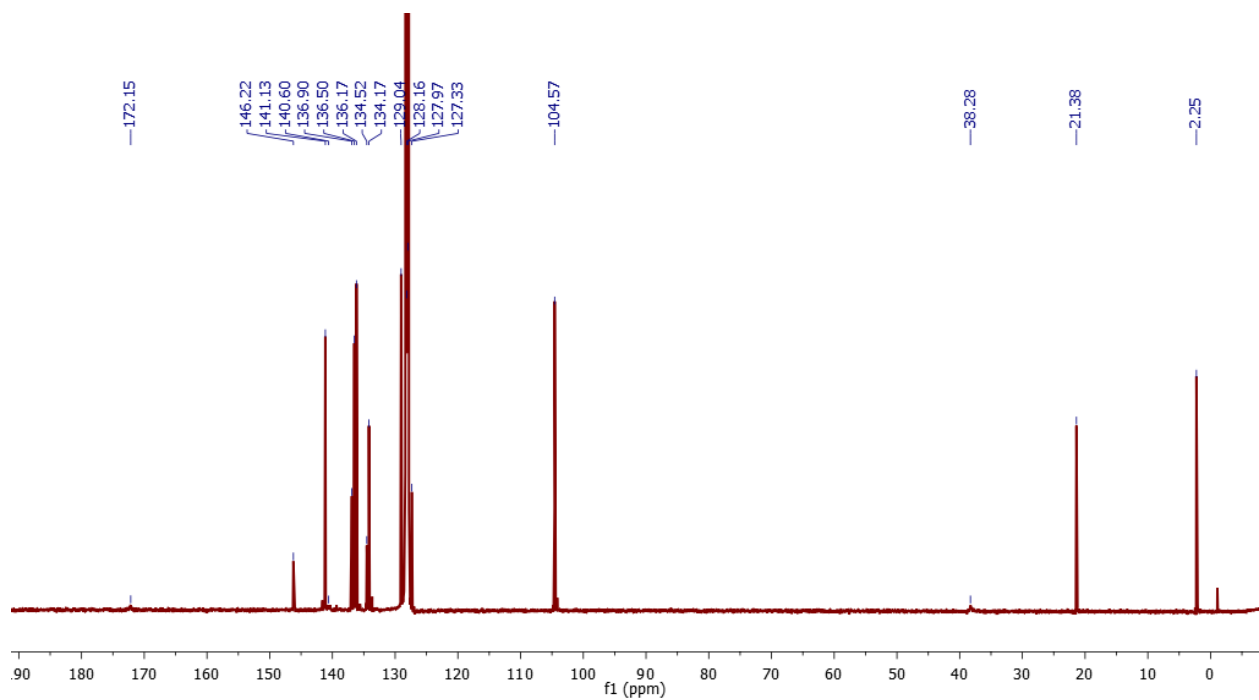

**Figure S8.**  $^{13}\text{C}\{^1\text{H}\}$  NMR spectrum of **2-CH<sub>2</sub>SiMe<sub>2</sub>Ph** in  $\text{C}_6\text{D}_6$ .

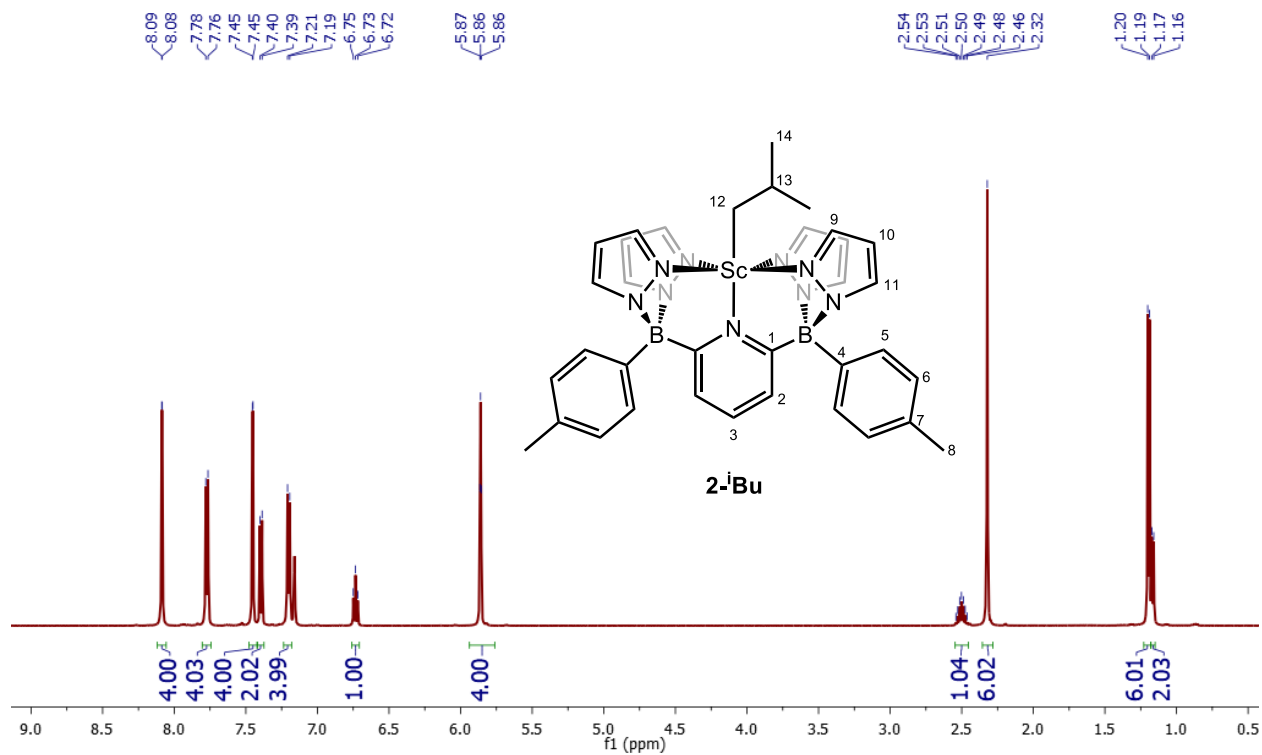

**Figure S9.**  $^1\text{H}$  NMR spectrum of **2-iBu** in  $\text{C}_6\text{D}_6$ .

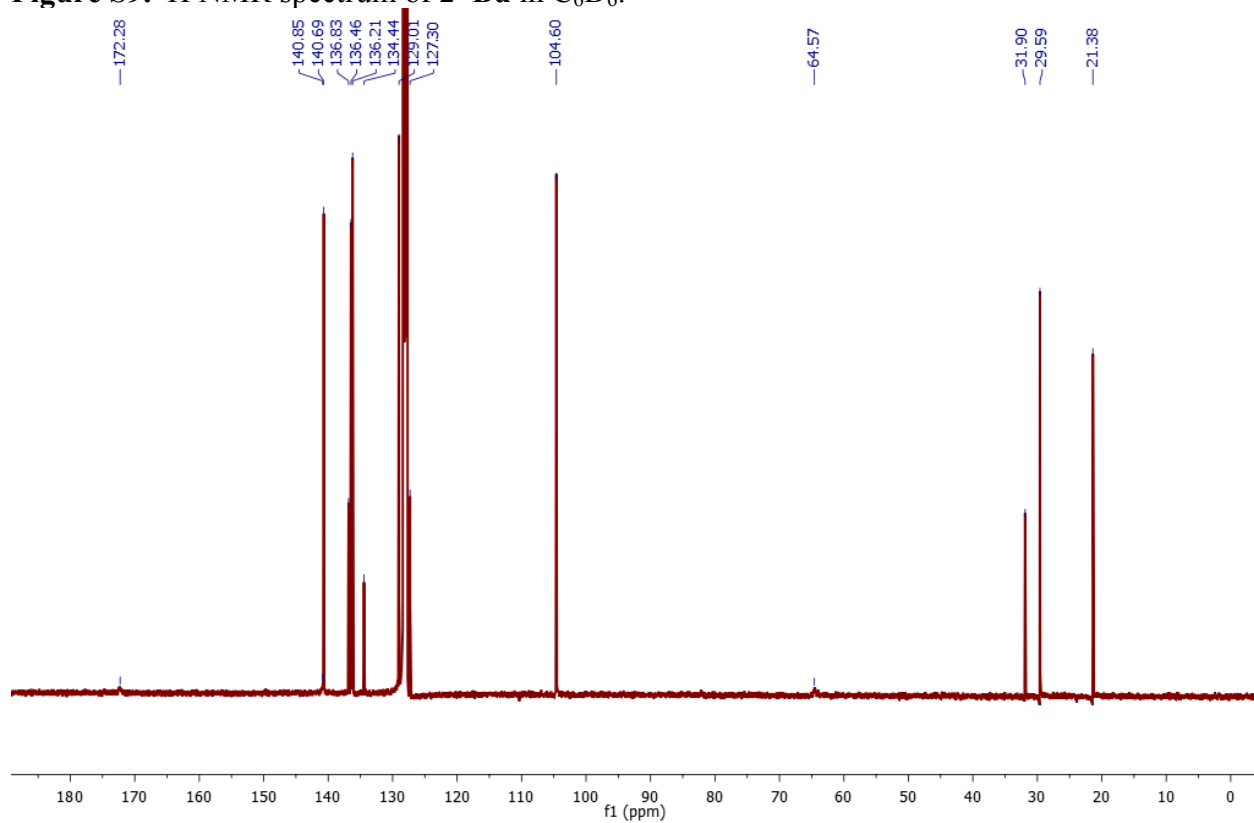

**Figure S10.**  $^{13}\text{C}\{^1\text{H}\}$  NMR spectrum of **2-iBu** in  $\text{C}_6\text{D}_6$ .

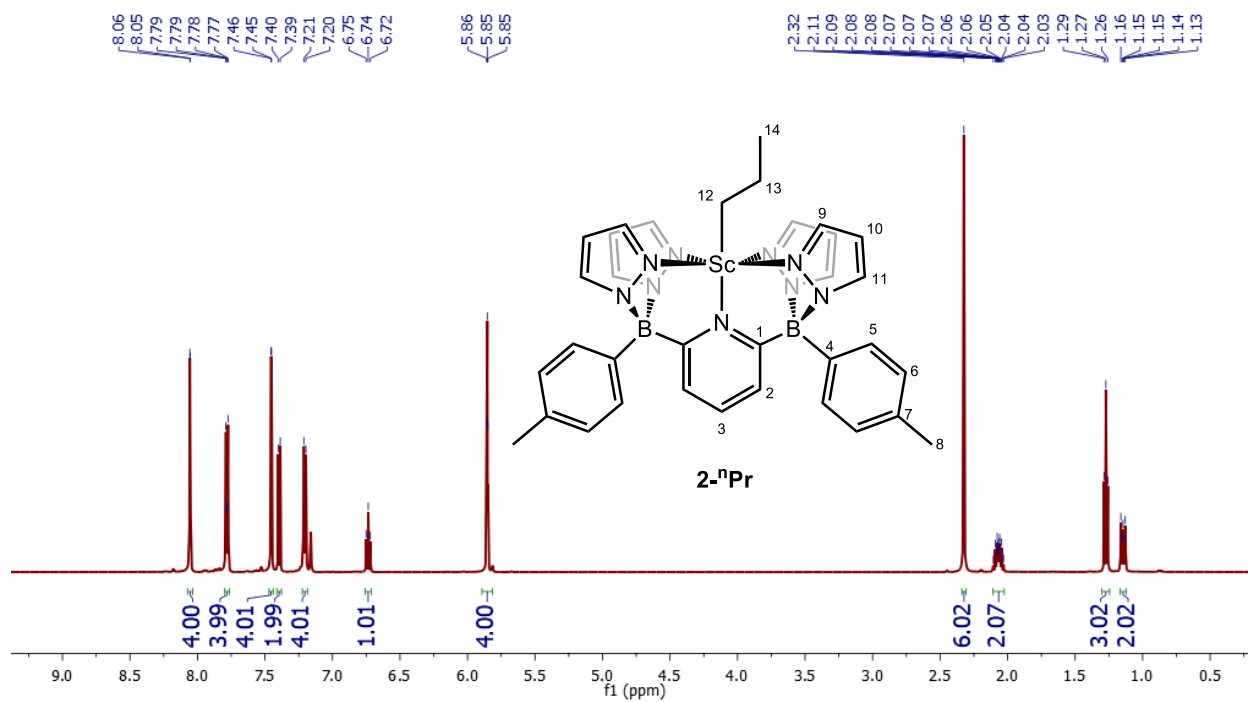

**Figure S2.** <sup>1</sup>H NMR spectrum of **2-nPr** in C<sub>6</sub>D<sub>6</sub>.

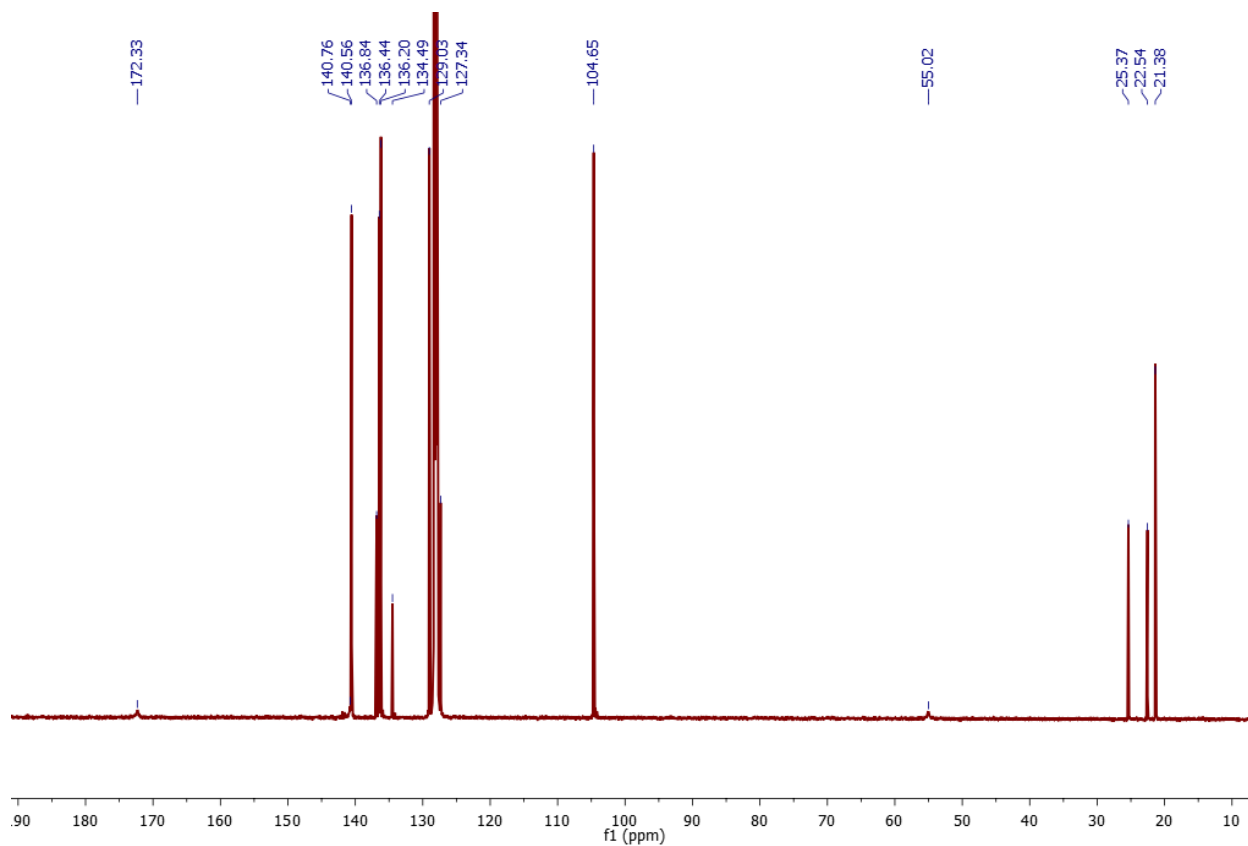

**Figure S3.** <sup>13</sup>C{<sup>1</sup>H} NMR spectrum of **2-nPr** in C<sub>6</sub>D<sub>6</sub>.

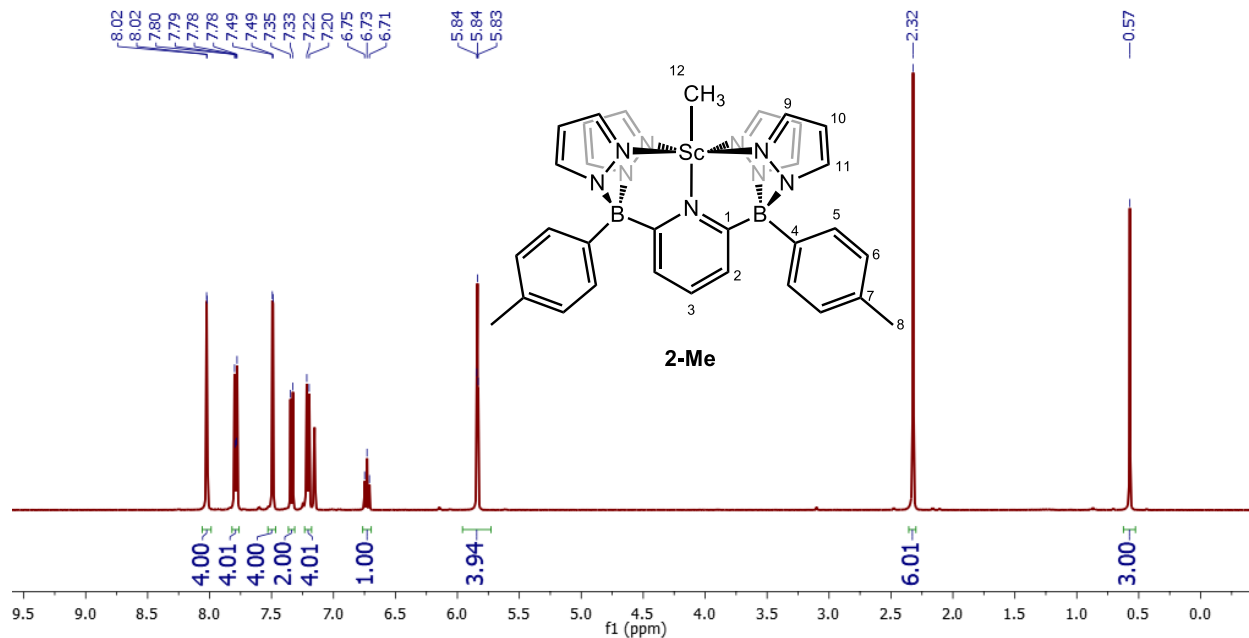

Figure S4.  $^1\text{H}$  NMR spectrum of **2-Me** in  $\text{C}_6\text{D}_6$ .

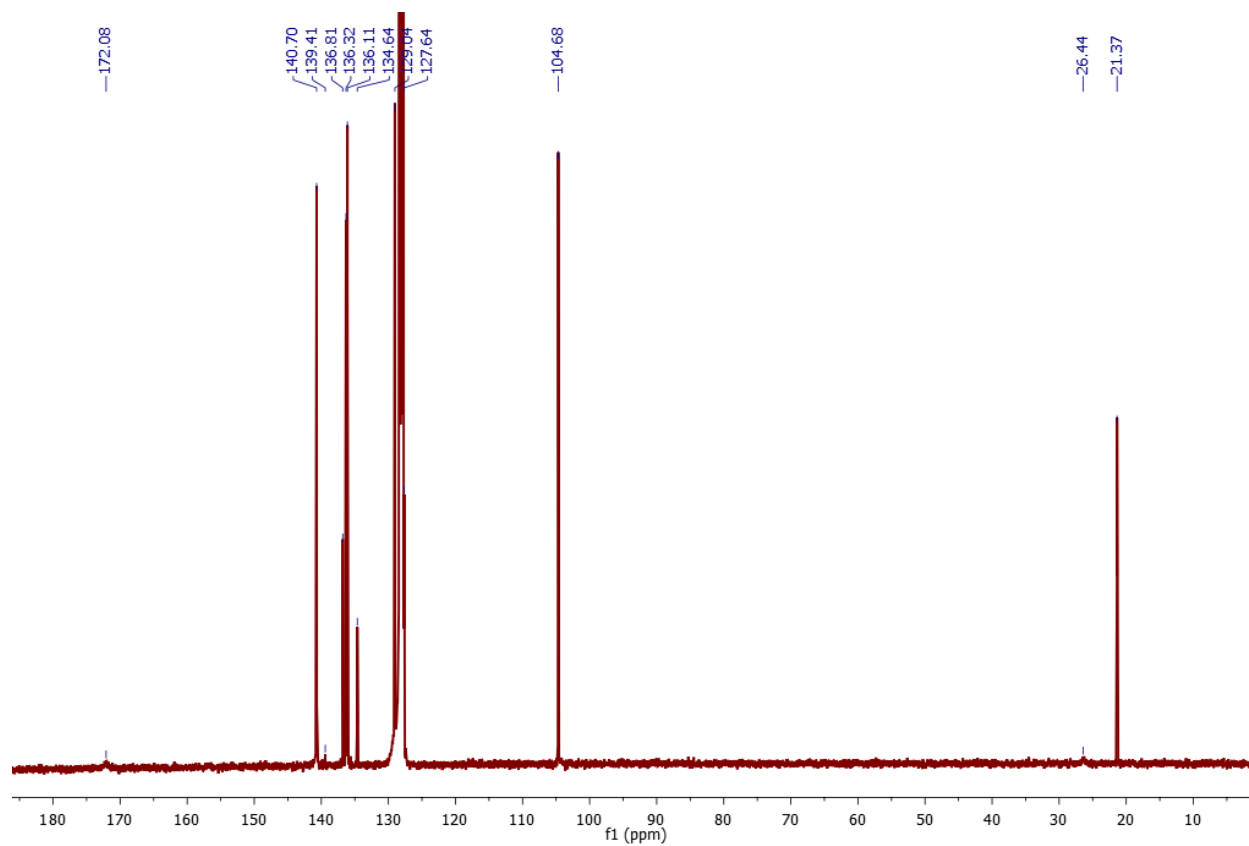

Figure S5.  $^{13}\text{C}\{^1\text{H}\}$  NMR spectrum of **2-Me** in  $\text{C}_6\text{D}_6$ .

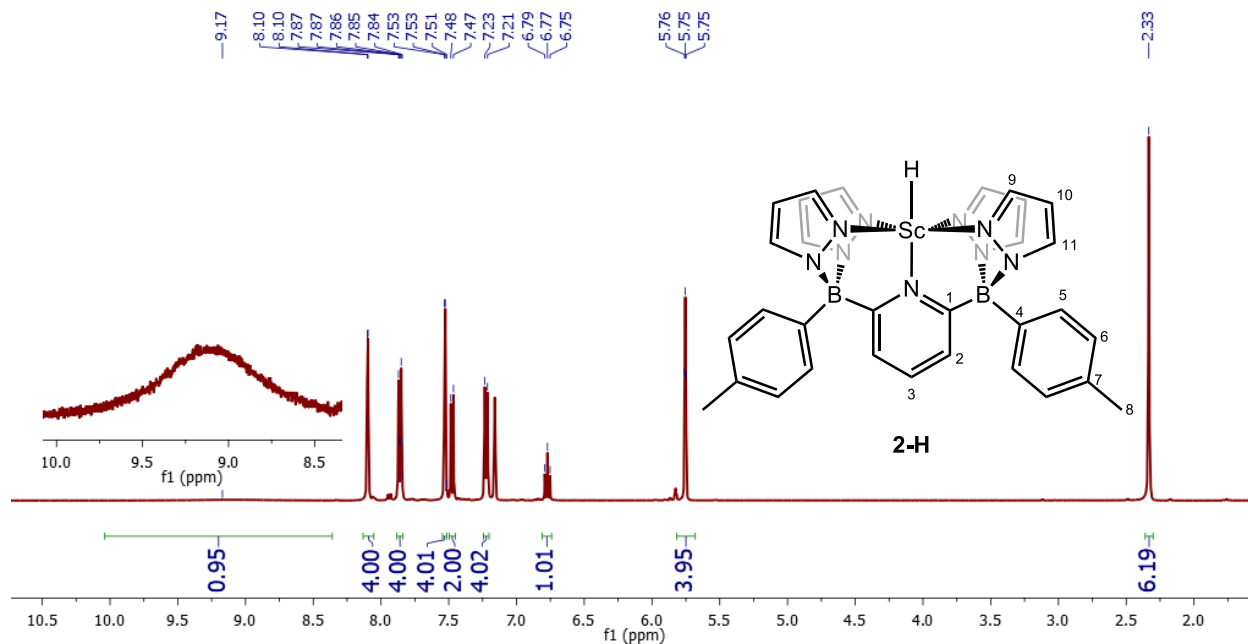

**Figure S6.**  $^1\text{H}$  NMR spectrum of **2-H** in  $\text{C}_6\text{D}_6$ .

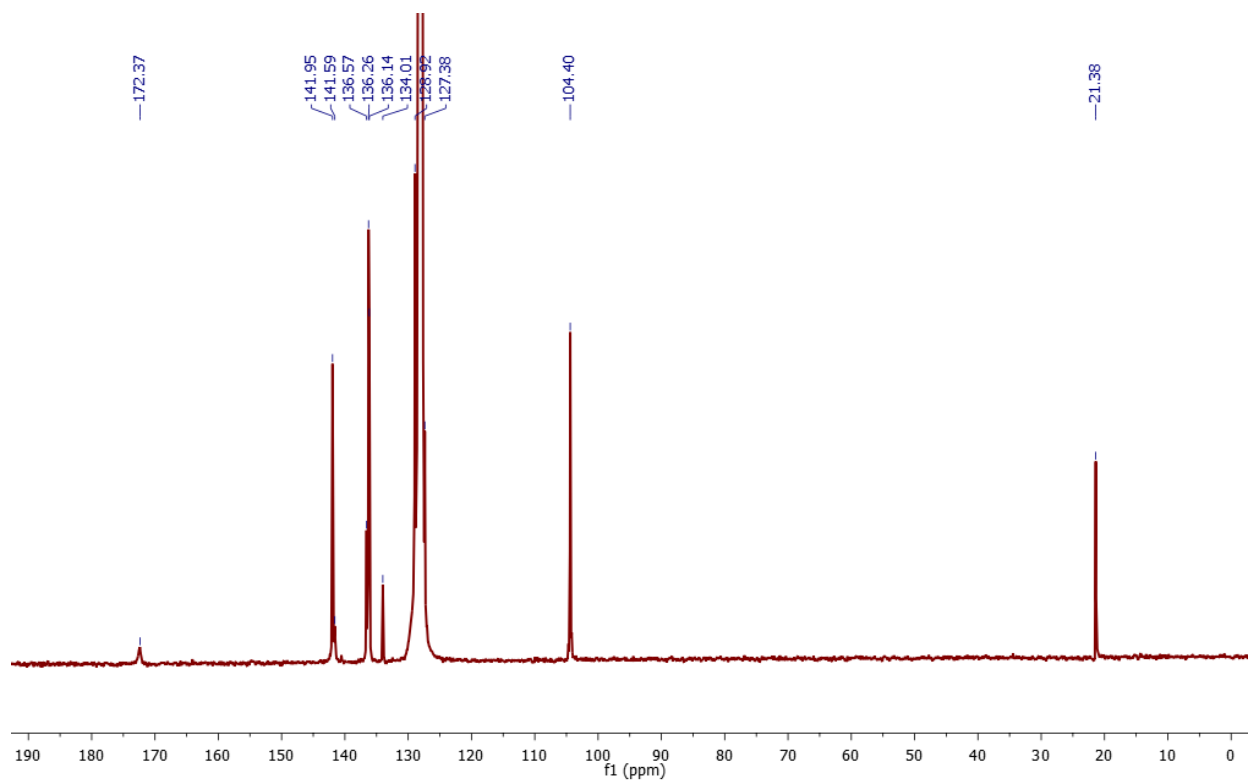

**Figure S7.**  $^{13}\text{C}\{^1\text{H}\}$  NMR spectrum of **2-H** in  $\text{C}_6\text{D}_6$ .

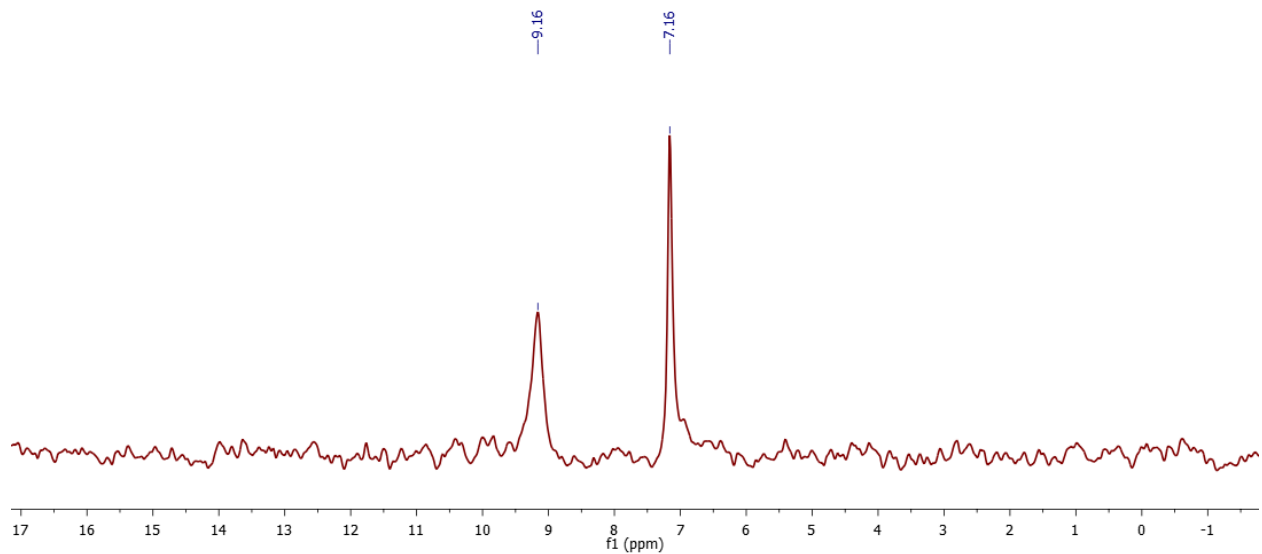

**Figure S8.**  $^2\text{H}$  NMR spectrum of **2-D** in  $\text{C}_6\text{H}_6$ .

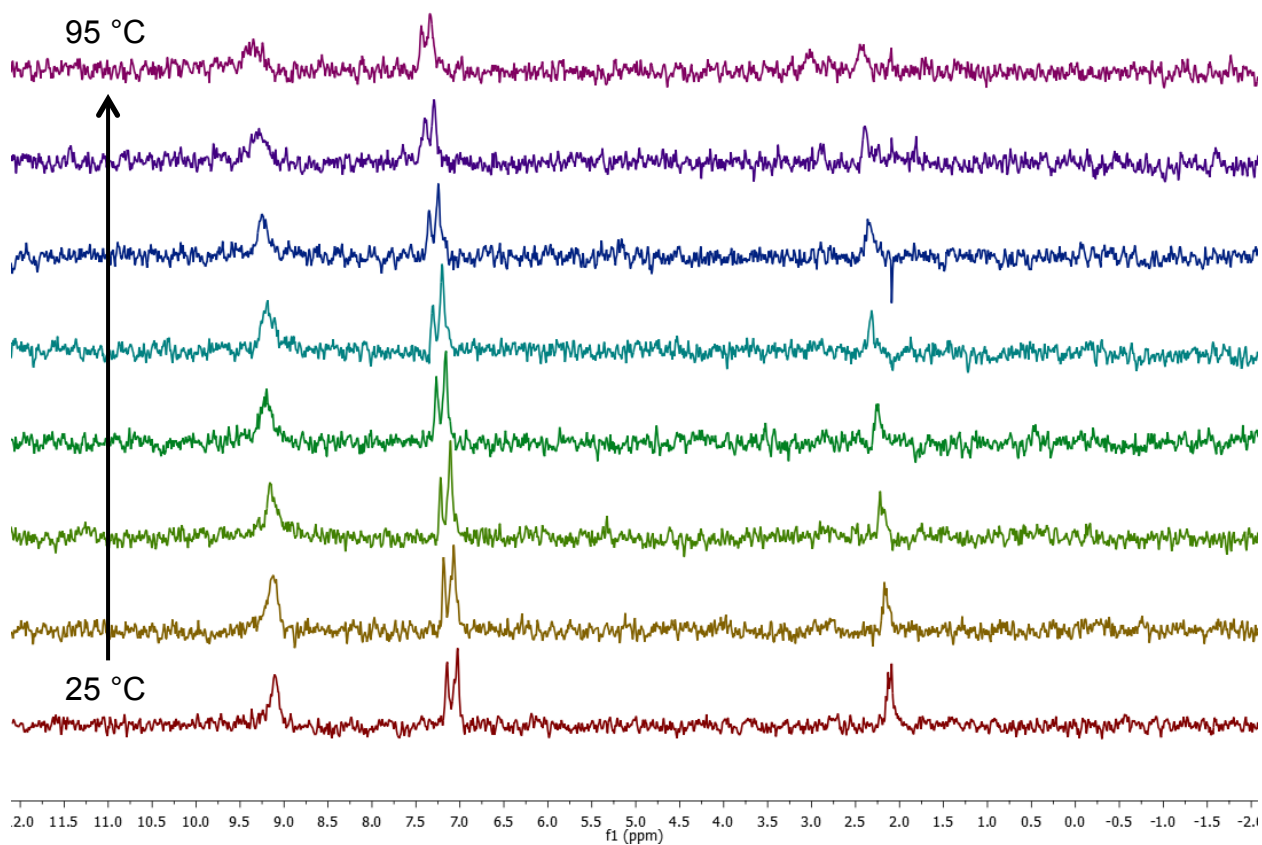

**Figure S9.** Variable temperature  $^2\text{H}$  NMR spectra of **2-D** in toluene- $\text{H}_8$ .



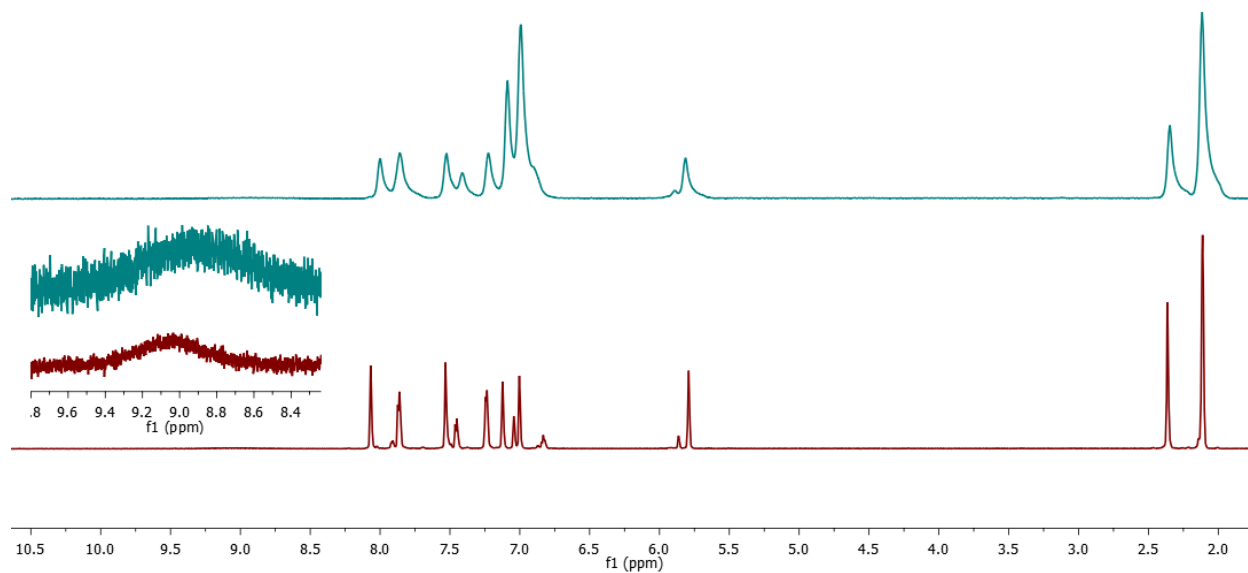

**Figure S10.** Stacked <sup>1</sup>H NMR spectra of **2-H** in toluene-*d*<sub>8</sub> at 368 K (top) and 298 K (bottom) with zoomed in region of the hydride (inset).

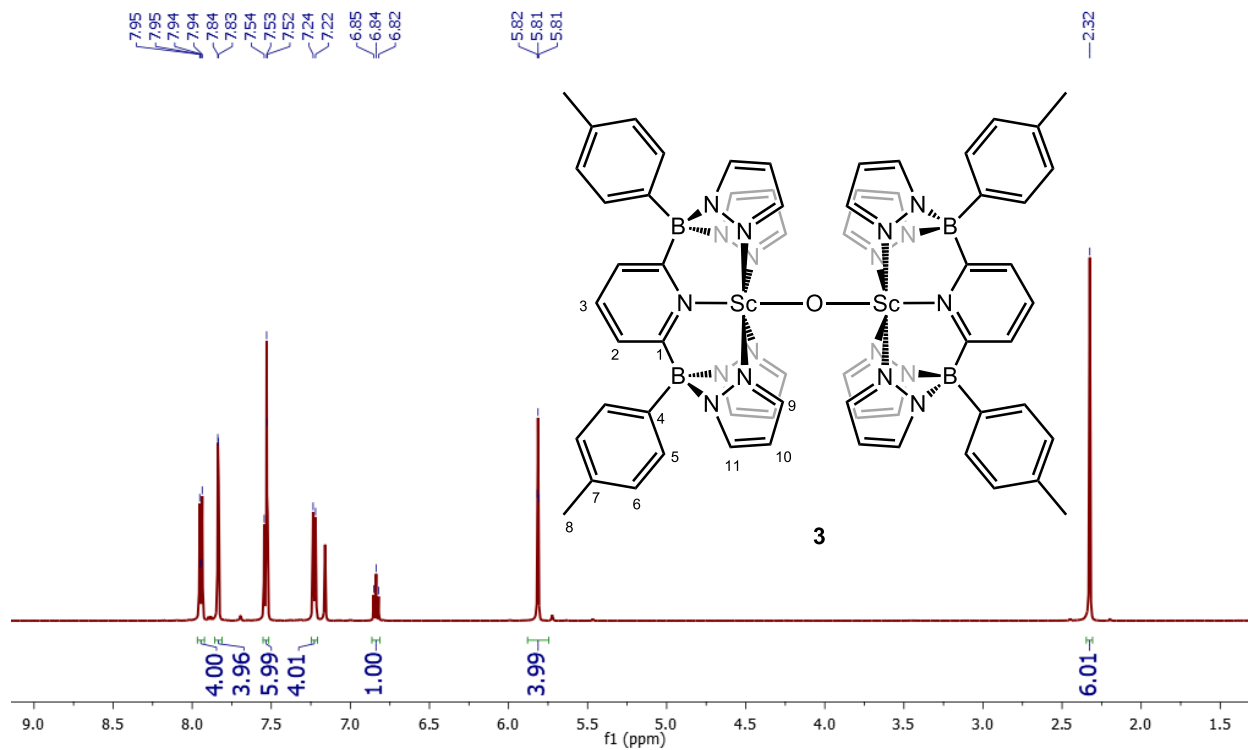

Figure S20.  $^1\text{H}$  NMR spectrum of **3** in  $\text{C}_6\text{D}_6$ .

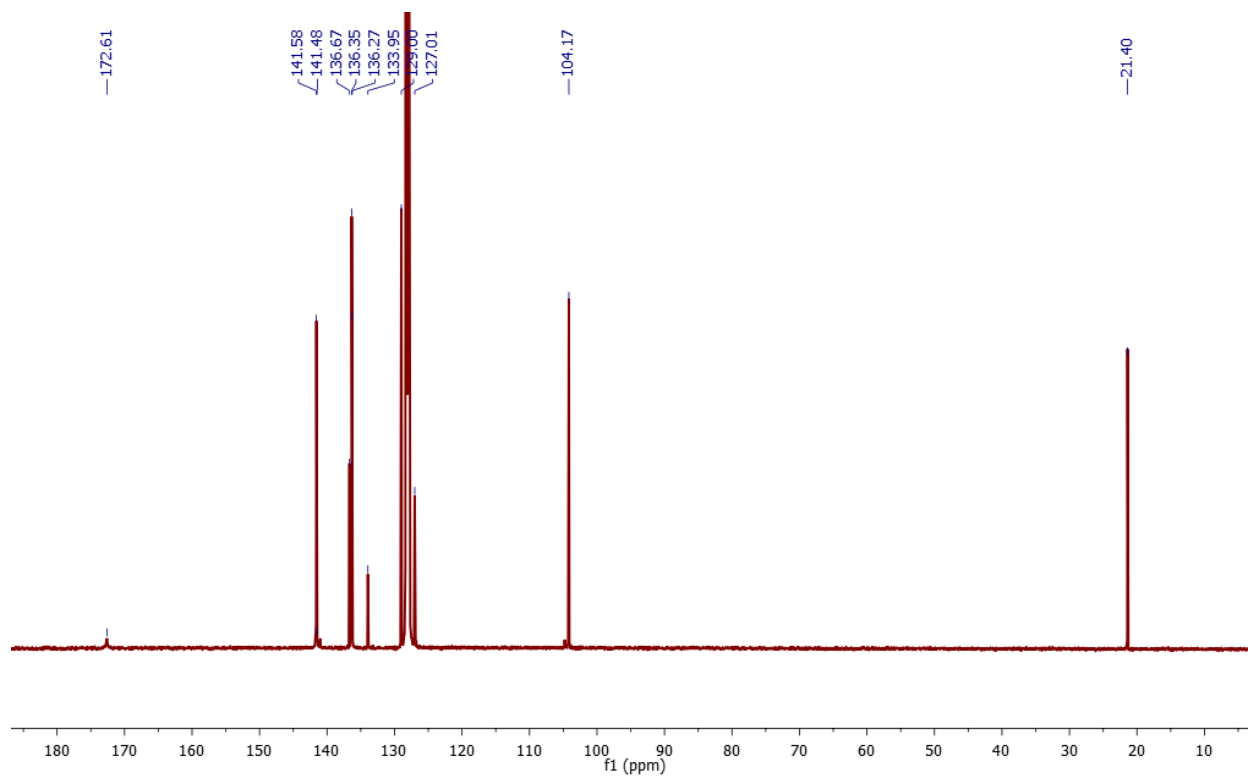

Figure S21.  $^{13}\text{C}\{^1\text{H}\}$  NMR spectrum of **3** in  $\text{C}_6\text{D}_6$ .

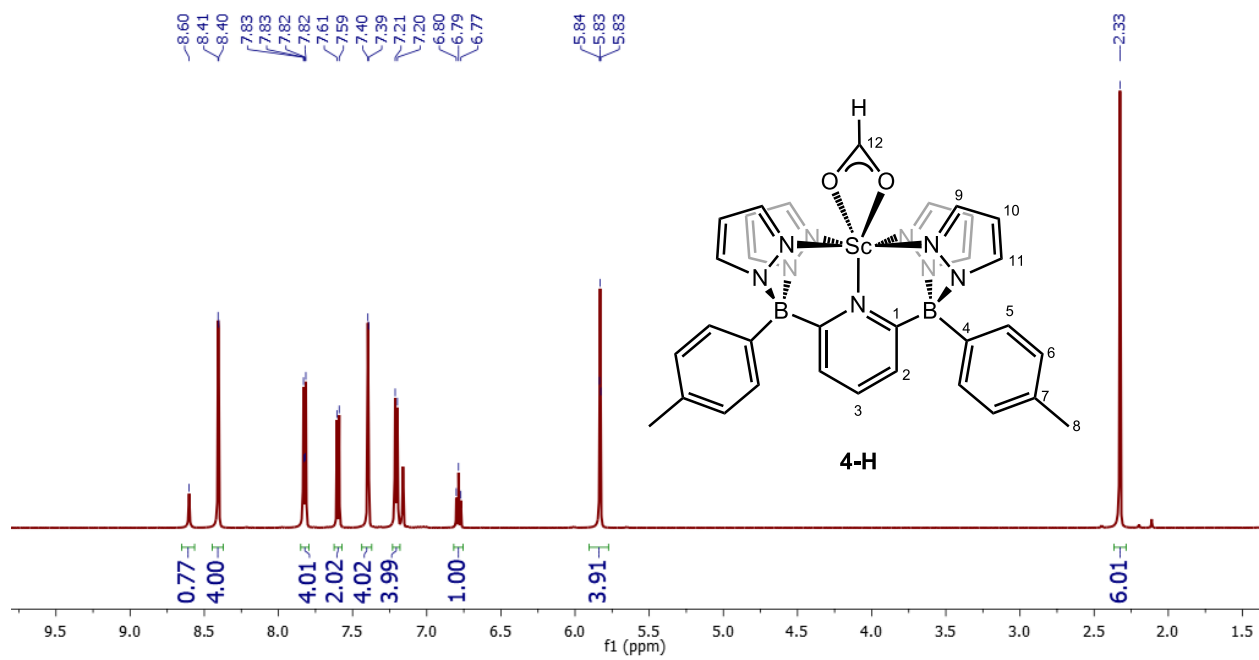

**Figure S22.**  $^1\text{H}$  NMR spectrum of **4-H** in  $\text{C}_6\text{D}_6$ .

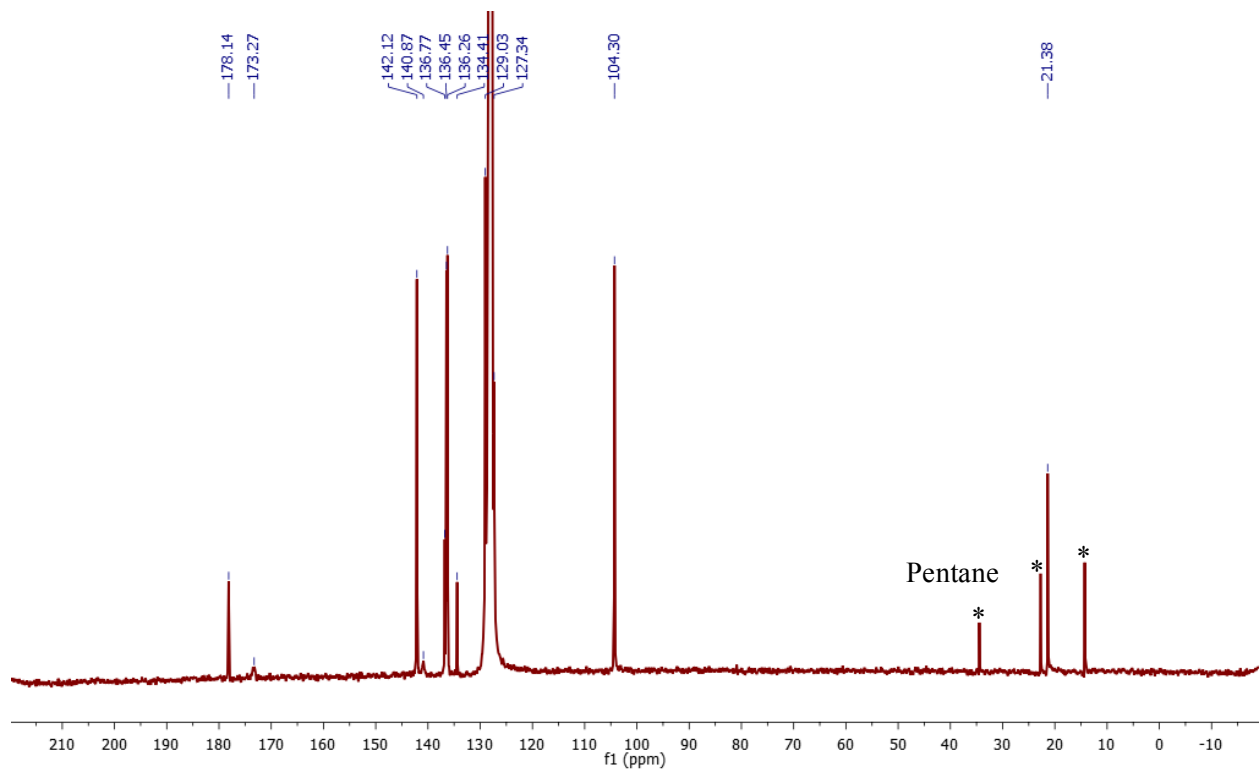

**Figure S23.**  $^{13}\text{C}\{^1\text{H}\}$  NMR spectrum of **4-H** in  $\text{C}_6\text{D}_6$ .

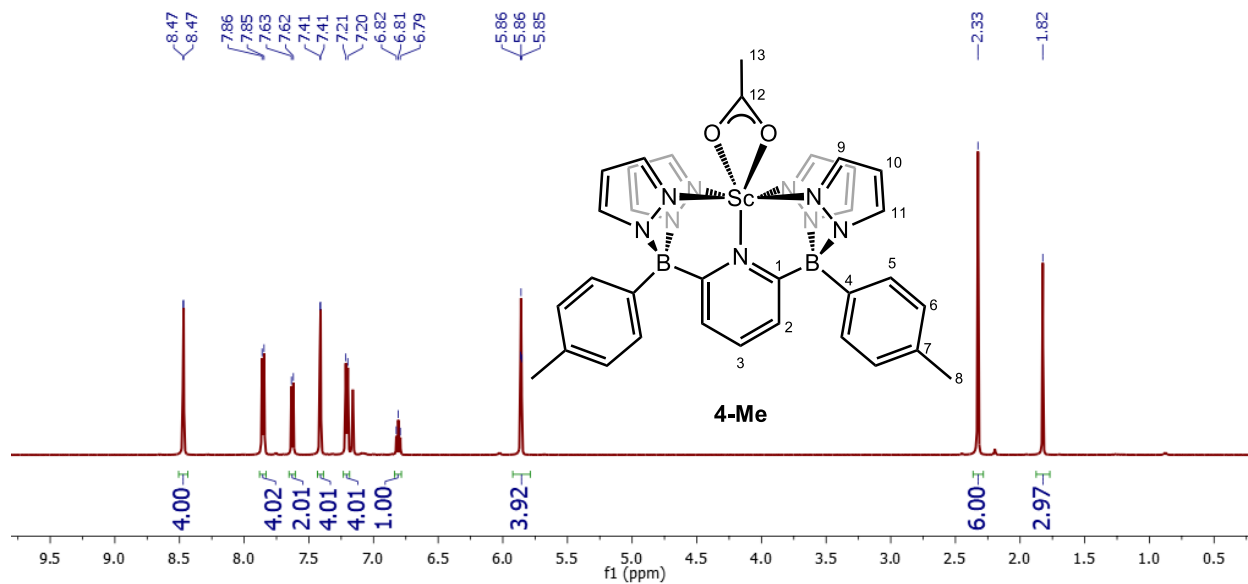

Figure S24.  $^1\text{H}$  NMR spectrum of **4-Me** in  $\text{C}_6\text{D}_6$ .

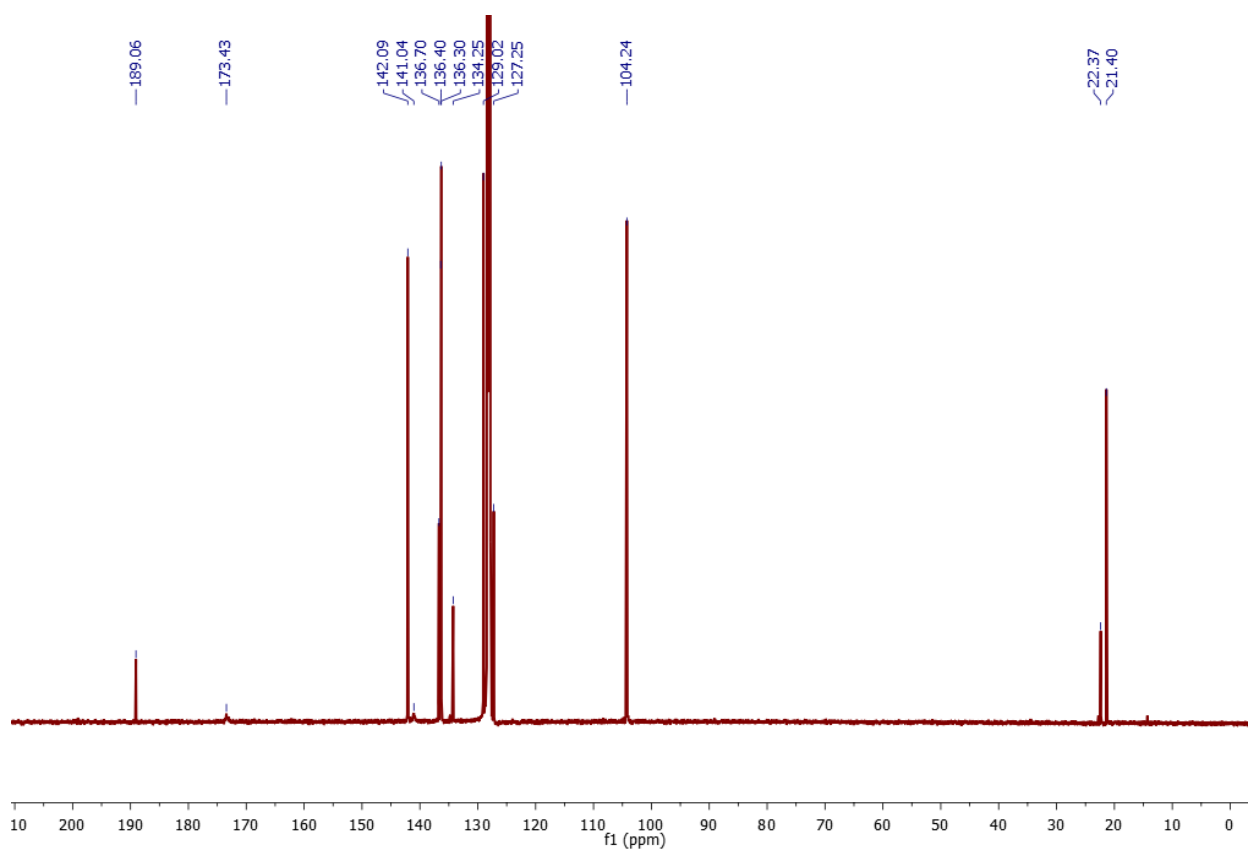

Figure S11.  $^{13}\text{C}$  NMR spectrum of **4-Me** in  $\text{C}_6\text{D}_6$ .

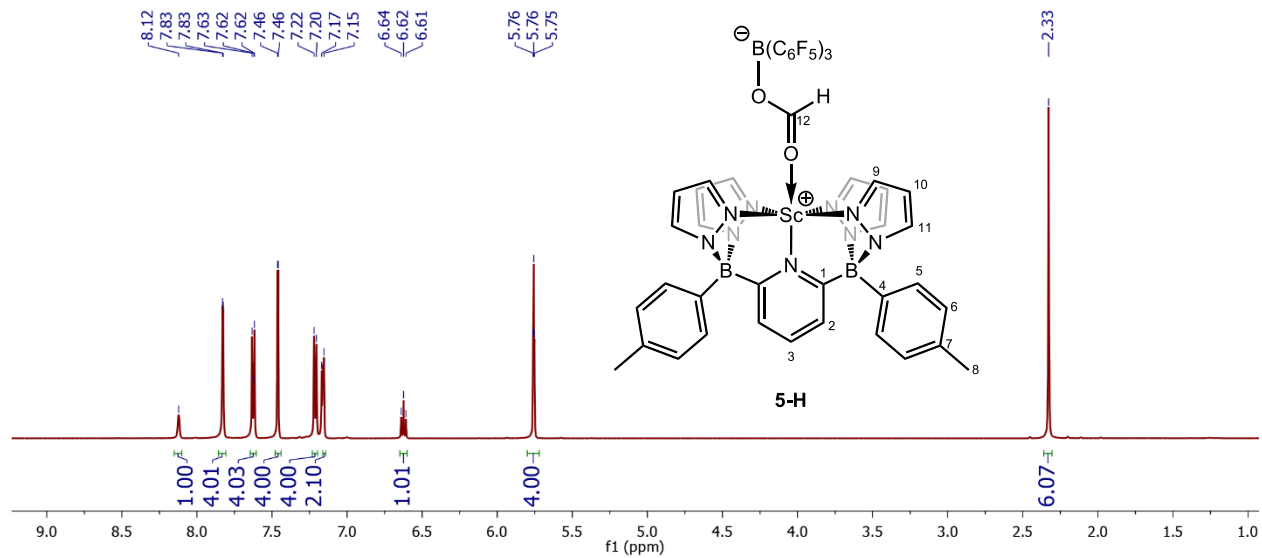

**Figure S26.**  $^1\text{H}$  NMR spectrum of **5-H** in  $\text{C}_6\text{D}_6$ .

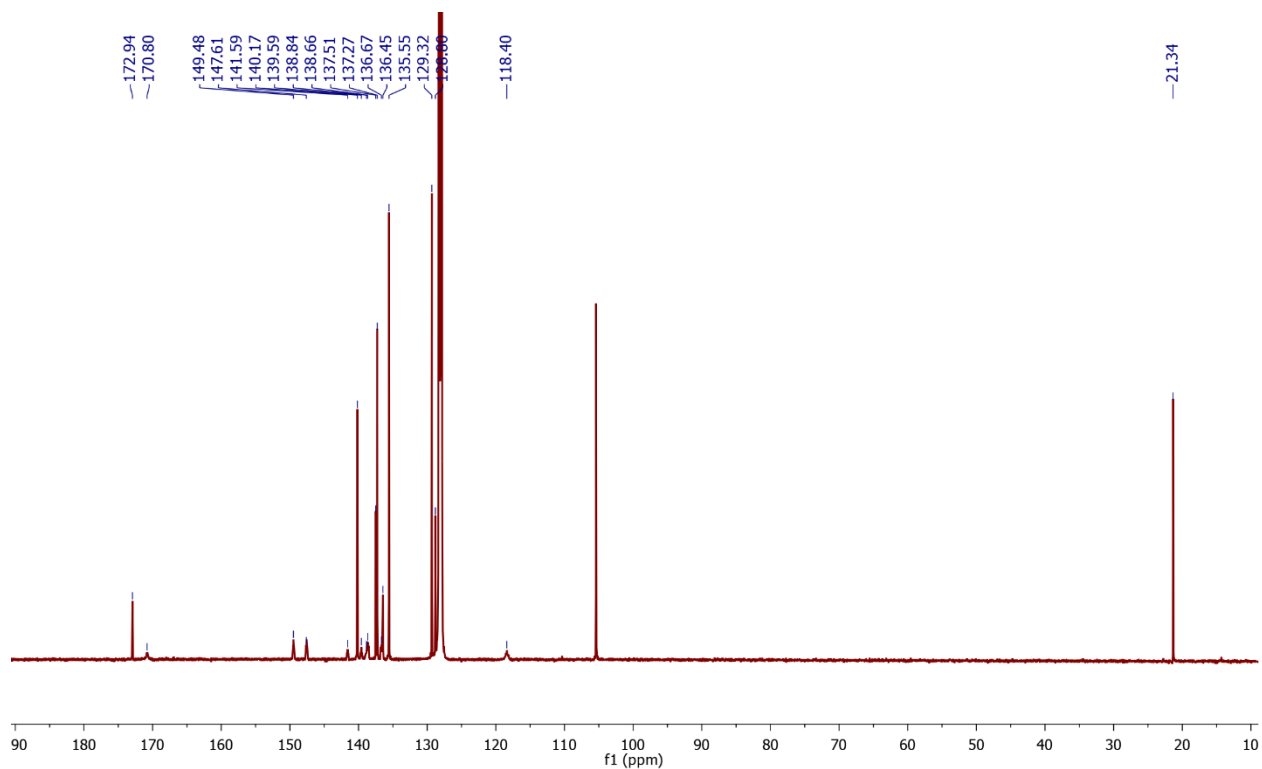

**Figure S27.**  $^{13}\text{C}\{^1\text{H}\}$  NMR spectrum of **5-H** in  $\text{C}_6\text{D}_6$ .

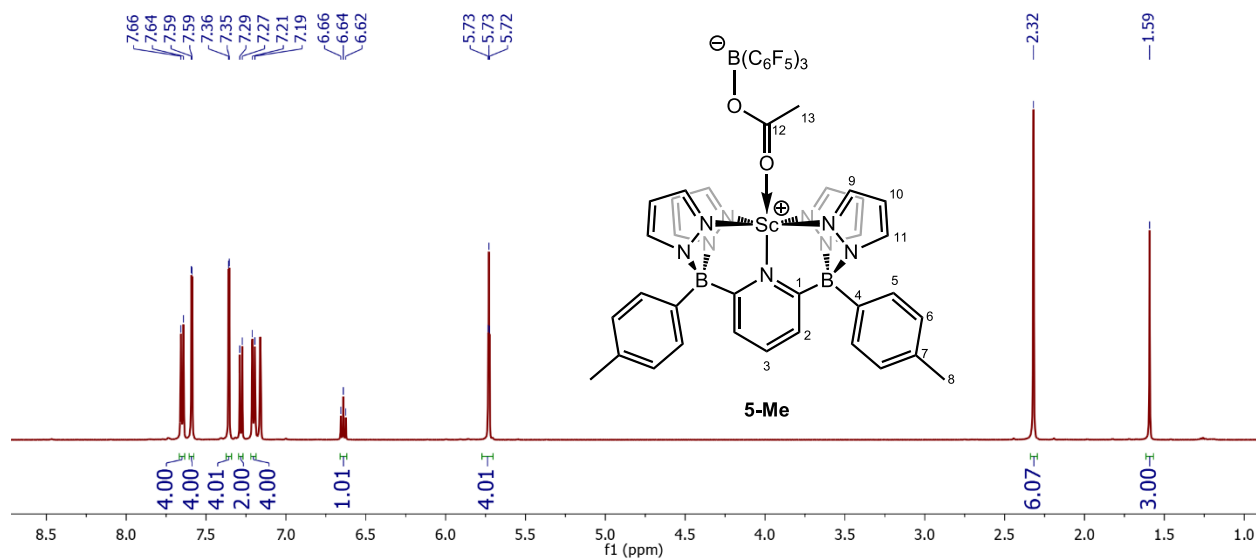

**Figure S12.**  $^1\text{H}$  NMR spectrum of **5-Me** in  $\text{C}_6\text{D}_6$ .

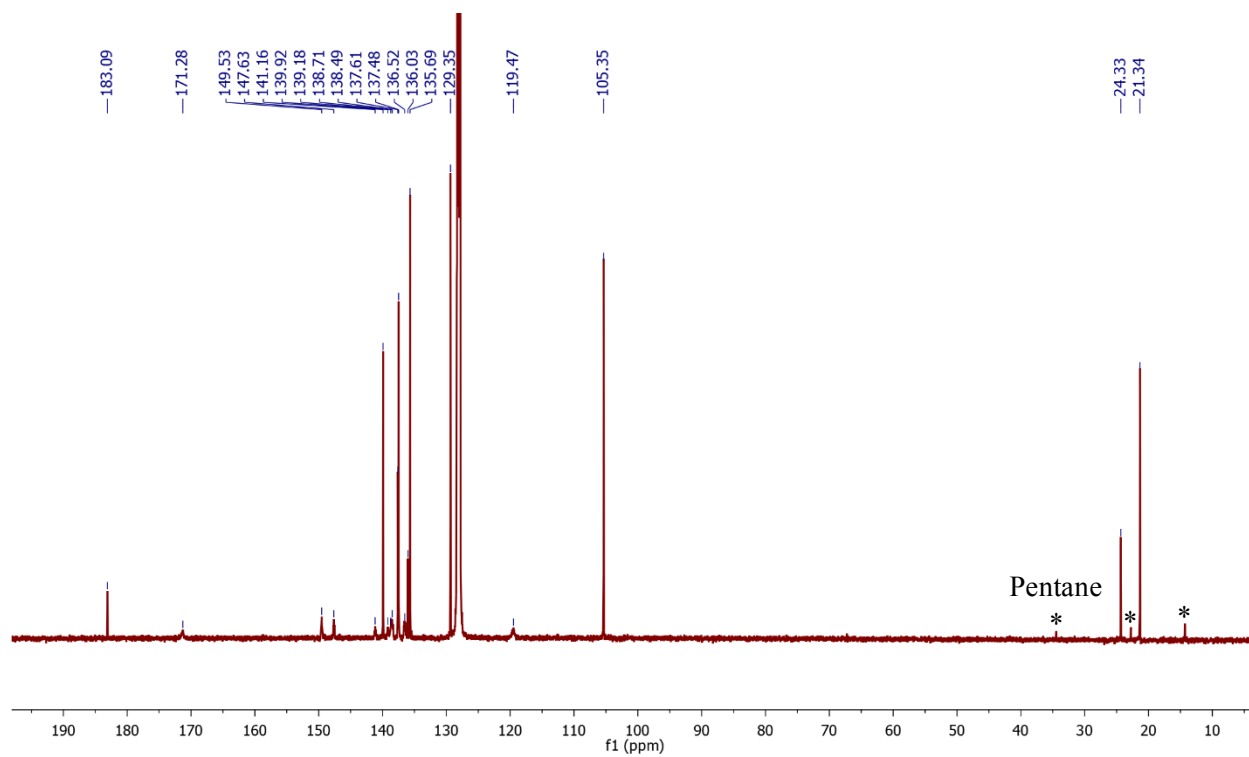

**Figure S13.**  $^{13}\text{C}\{^1\text{H}\}$  NMR spectrum of **5-Me** in  $\text{C}_6\text{D}_6$ .

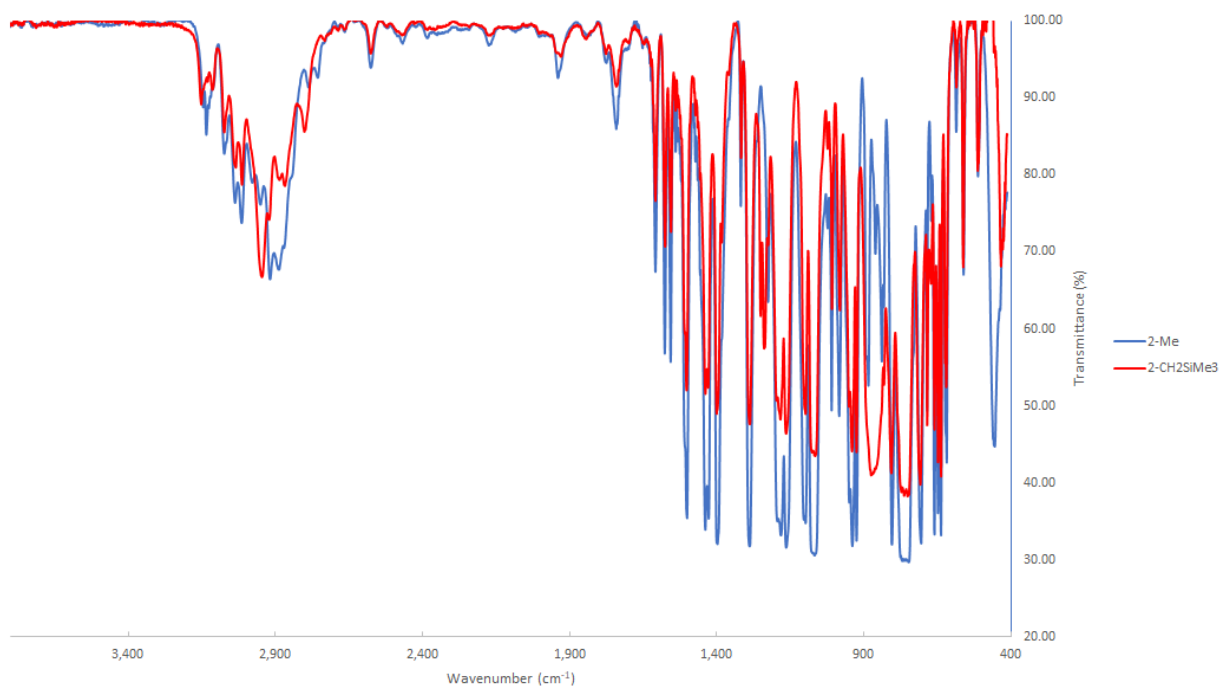

**Figure S30.** Superimposed FT-IR spectra of **2-Me** and **2-CH<sub>2</sub>SiMe<sub>3</sub>**, KBr pellet.

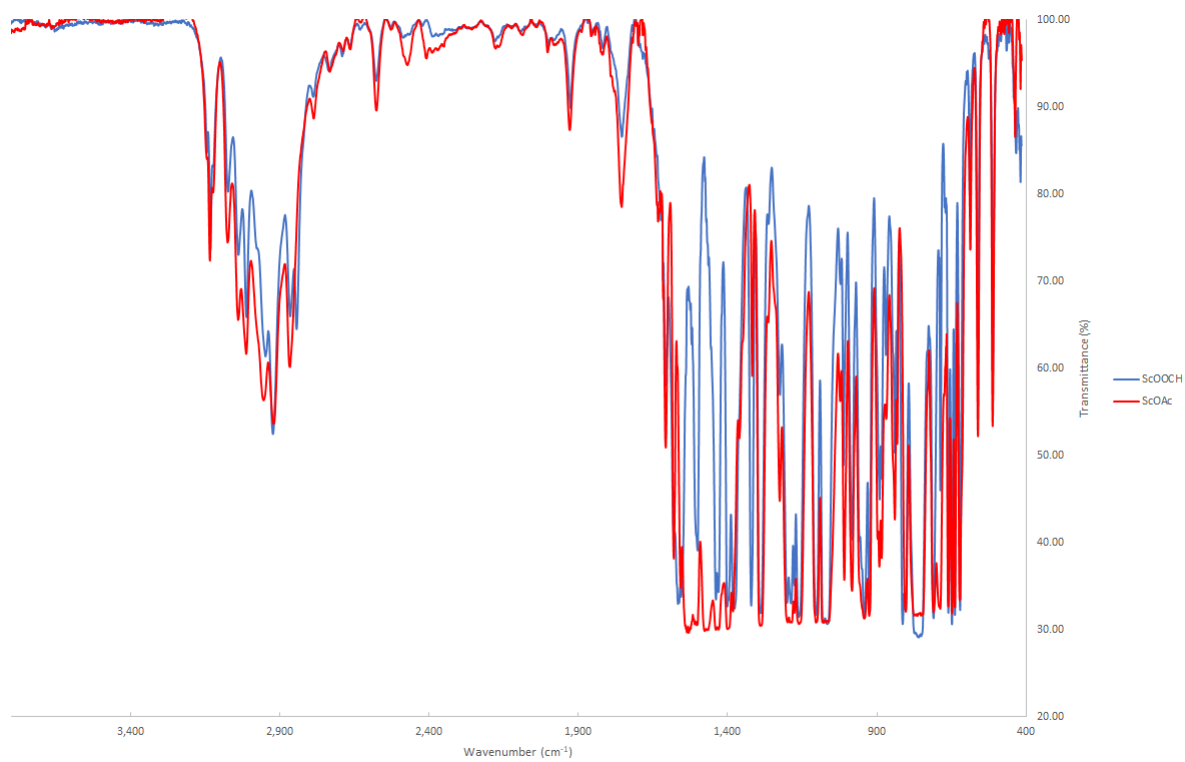

**Figure S31.** Superimposed FT-IR spectra of **4-H** and **4-Me**, KBr pellet.

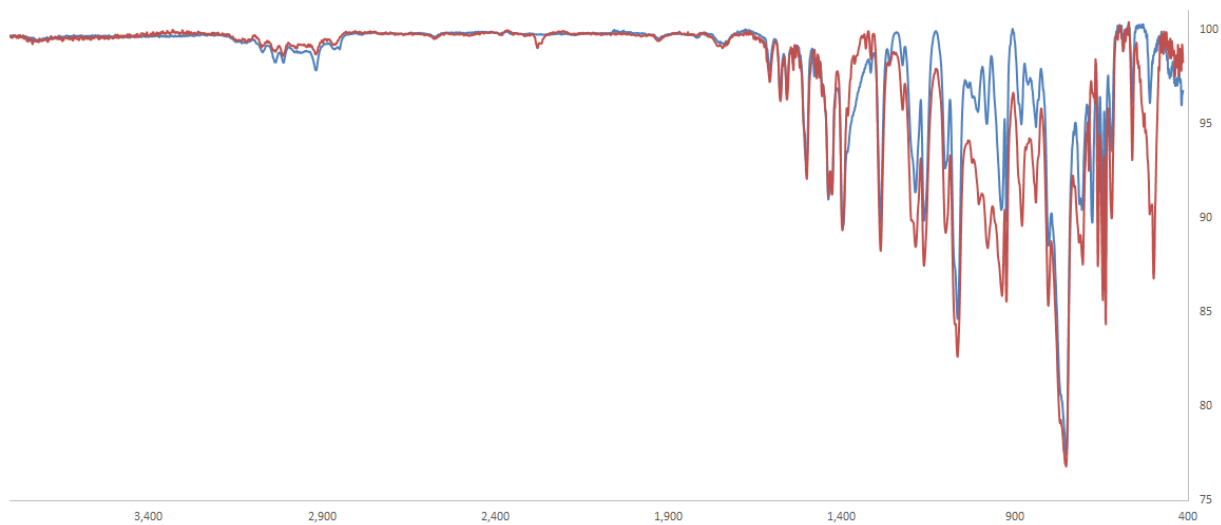

**Figure S32.** Superimposed FT-IR spectra of **2-H** and **2-D**, thin film on AgCl plates.

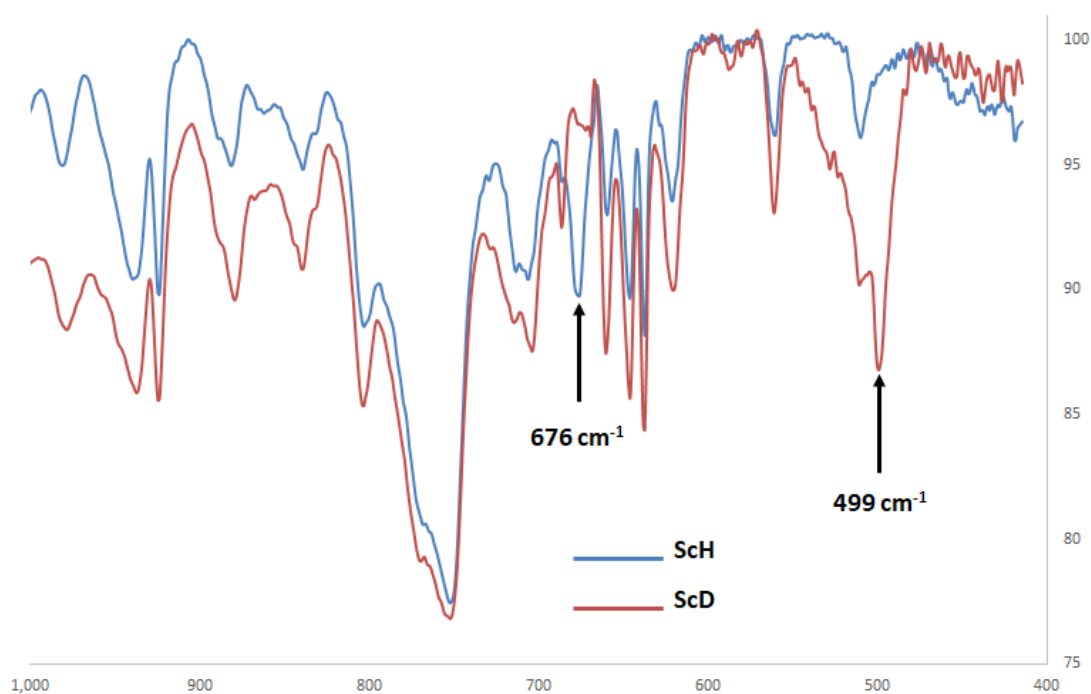

**Figure S33.** Zoomed in region of the superimposed FT-IR spectra of **2-H** and **2-D**.



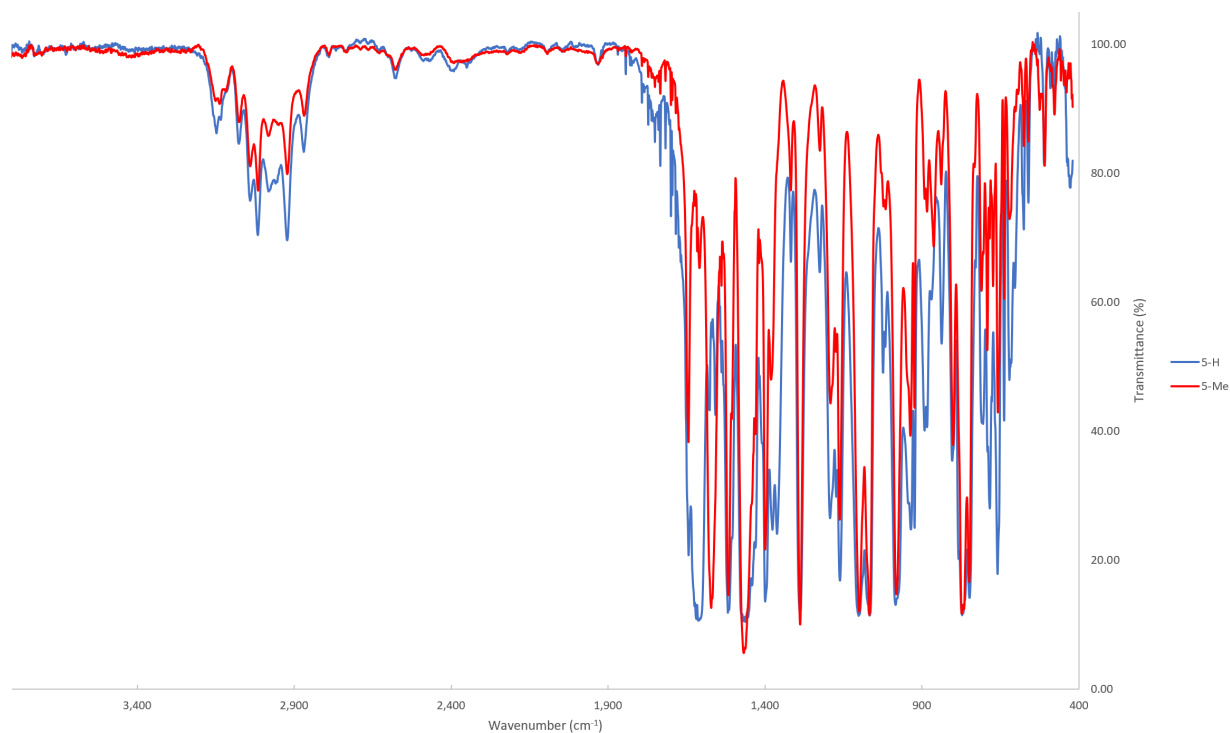

**Figure S34.** Superimposed FT-IR spectra of **5-H** and **5-Me**, KBr pellet.

$$MW_{ScH} = \frac{(mg_{ScH})(MW_{PhNNPh})(ml_{PhNNPh})}{(mg_{PhNNPh})(ml_{ScH})}$$

Mass of ScH = 10.1 mg

Mass of ScH = 10.2 mg

Molecular weight of azobenzene = 182.23 g/mol

$V_i$  of ScH = 0.83 mL  $V_f$  of ScH = 0.24 mL

$V_i$  of Azobenzene = 0.85 mL  $V_f$  of Azobenzene = 1.47 mL

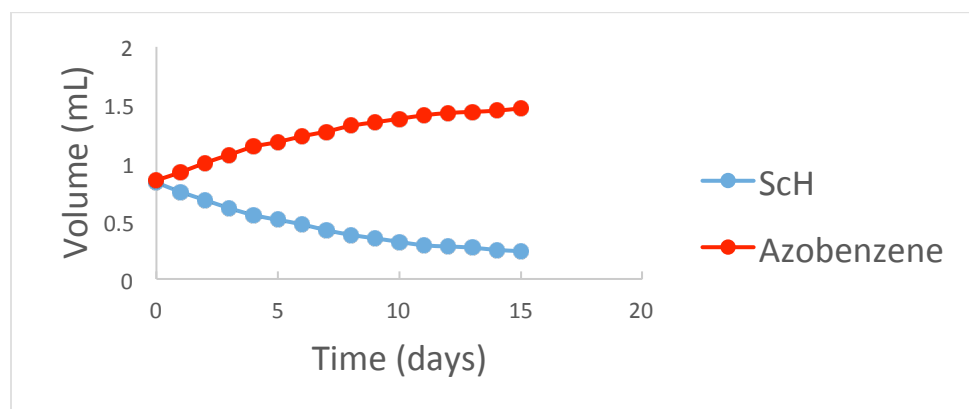

**Figure S35.** Signer method for the molecular weight determination of **2-H** in  $C_6H_6$ .

$$r = \frac{k_b T}{6\pi D \eta}$$

Where  $r$  = Hydrodynamic radius

$k_b$  = Boltzmann constant =  $1.38 \times 10^{-23}$  J K<sup>-1</sup>

$T$  = Temperature = 298 K

$D$  = Diffusion constant obtained from DOSY NMR spectrum

$\eta$  = Viscosity of C<sub>6</sub>D<sub>6</sub> at 298 K = 0.6392 mPa.s<sup>8</sup>

| Complex     | D (m <sup>2</sup> /s)  | r (Å) |
|-------------|------------------------|-------|
| <b>2-H</b>  | $4.80 \times 10^{-10}$ | 7.11  |
| <b>2-Me</b> | $6.88 \times 10^{-10}$ | 4.96  |
| <b>3</b>    | $4.83 \times 10^{-10}$ | 7.07  |

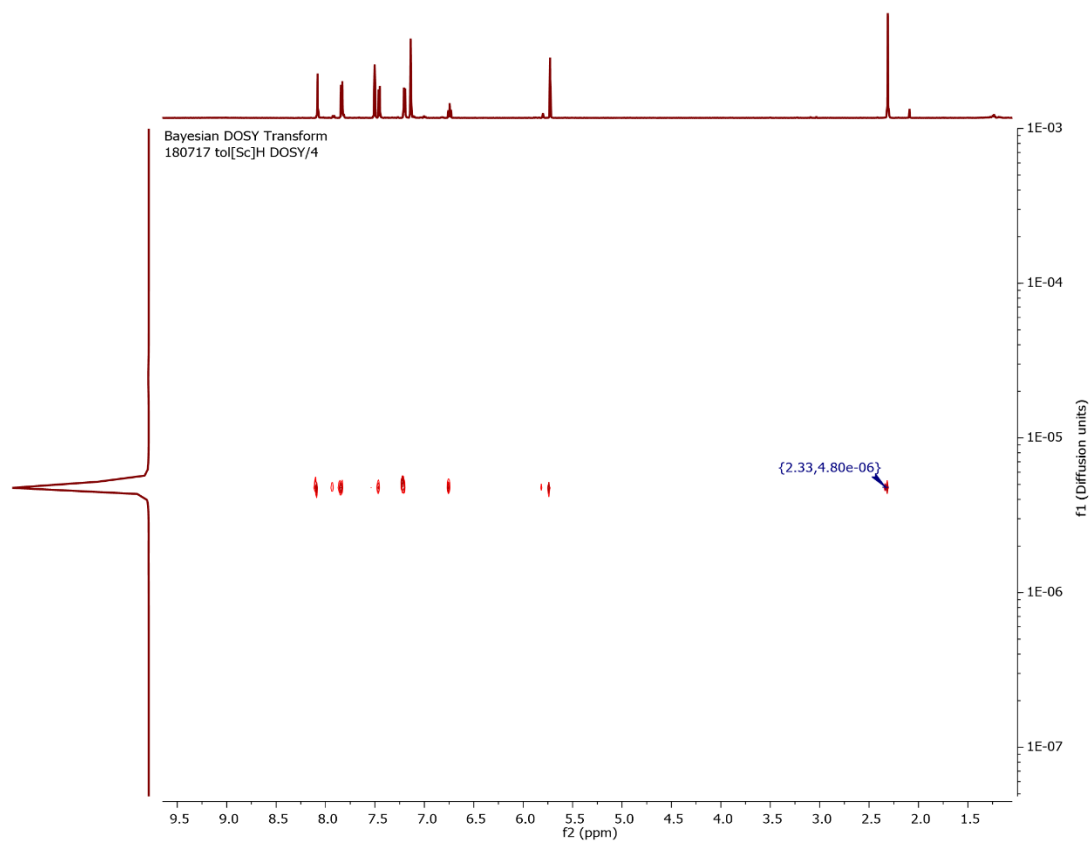

**Figure S36.** 2D DOSY spectrum of **2-H** in C<sub>6</sub>D<sub>6</sub>.

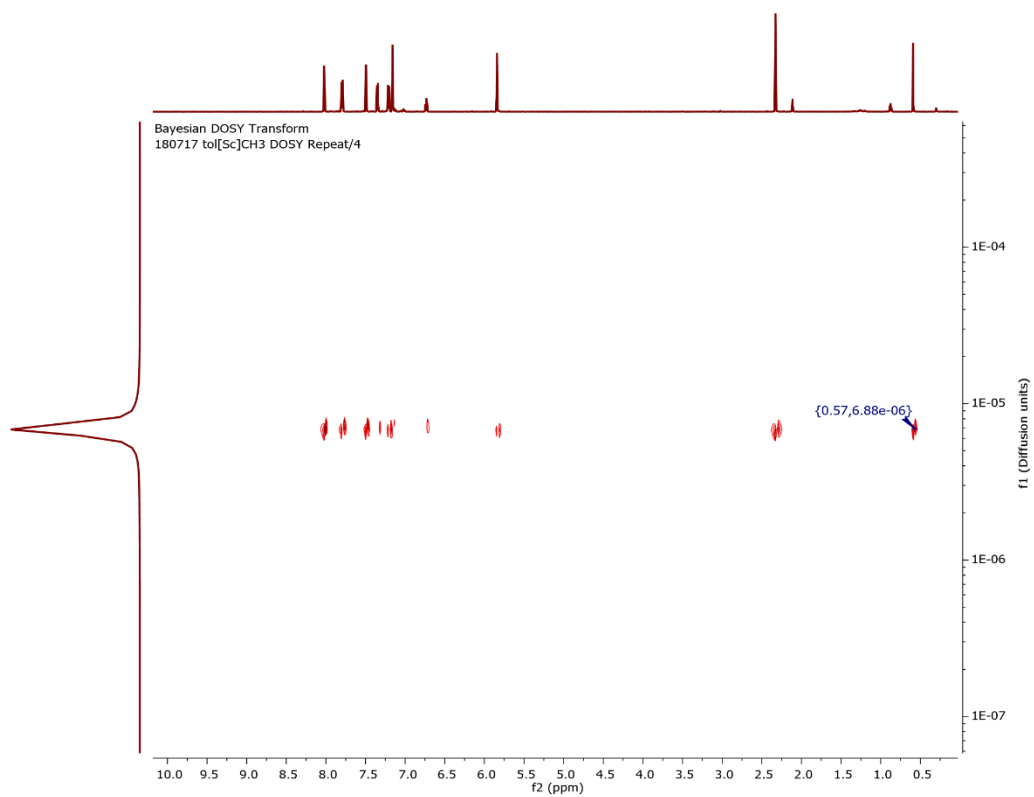

**Figure S14.** 2D DOSY spectrum of **2-Me** in  $C_6D_6$ .

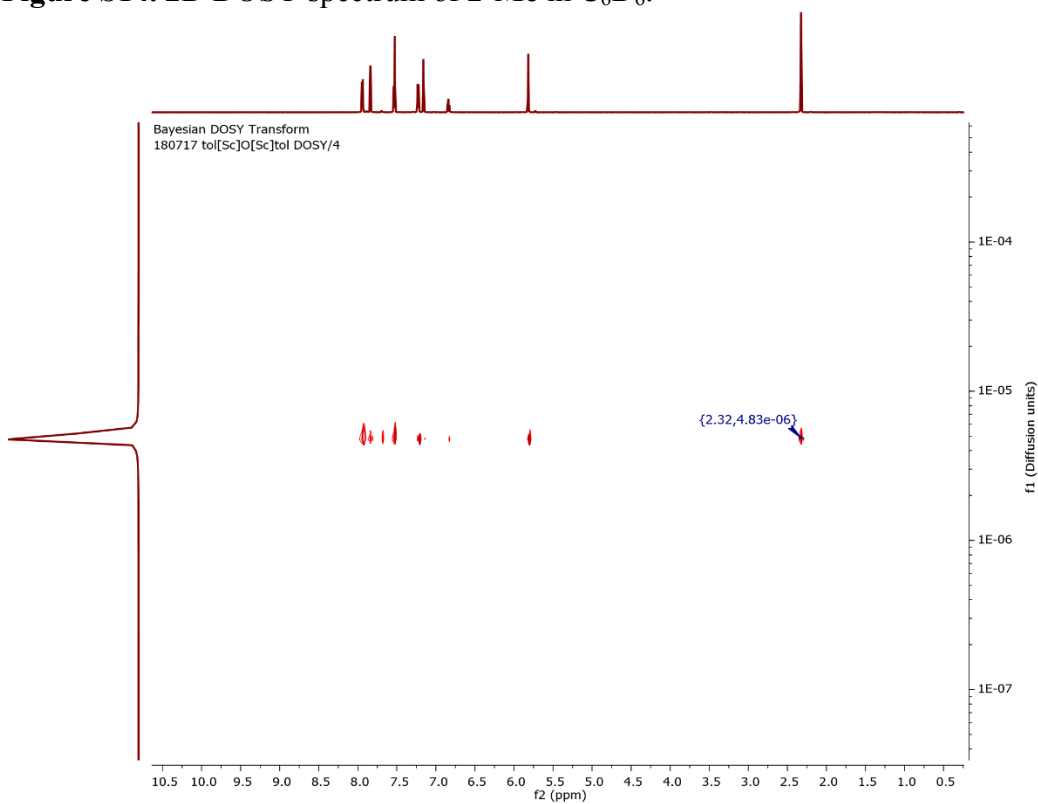

**Figure S15.** 2D DOSY spectrum of **3** in  $C_6D_6$ .

**Table S1.** Crystal data collection and refinement parameters for complexes.

|                                              | <b>1</b>                                                                                                 | <b>2-Me</b>                                                                                         | <b>2-CH<sub>2</sub>SiMe<sub>3</sub></b>                            |
|----------------------------------------------|----------------------------------------------------------------------------------------------------------|-----------------------------------------------------------------------------------------------------|--------------------------------------------------------------------|
| <b>formula</b>                               | C <sub>31</sub> H <sub>29</sub> B <sub>2</sub> ClN <sub>9</sub> Sc,<br>2(C <sub>6</sub> H <sub>6</sub> ) | C <sub>32</sub> H <sub>32</sub> B <sub>2</sub> N <sub>9</sub> Sc, 2(C <sub>6</sub> H <sub>6</sub> ) | C <sub>35</sub> H <sub>40</sub> B <sub>2</sub> N <sub>9</sub> ScSi |
| <i>fw</i>                                    | 785.88                                                                                                   | 765.46                                                                                              | 681.43                                                             |
| <b>crystal system</b>                        | triclinic                                                                                                | triclinic                                                                                           | monoclinic                                                         |
| <b>space group</b>                           | P-1                                                                                                      | P-1                                                                                                 | C2/c                                                               |
| <i>a</i> (Å)                                 | 10.2171(2)                                                                                               | 10.2075(9)                                                                                          | 39.5534(15)                                                        |
| <i>b</i> (Å)                                 | 12.1118(4)                                                                                               | 11.9288(10)                                                                                         | 8.3472(3)                                                          |
| <i>c</i> (Å)                                 | 18.2907(4)                                                                                               | 18.5503(16)                                                                                         | 27.4331(9)                                                         |
| <i>α</i> (deg)                               | 103.202(2)                                                                                               | 104.426(4)                                                                                          | 90                                                                 |
| <i>β</i> (deg)                               | 92.4060(10)                                                                                              | 92.714(5)                                                                                           | 126.713(2)                                                         |
| <i>γ</i> (deg)                               | 113.9310(10)                                                                                             | 112.543(4)                                                                                          | 90                                                                 |
| <i>V</i> (Å <sup>3</sup> )                   | 1990.99(9)                                                                                               | 1994.4(3)                                                                                           | 7260.7(5)                                                          |
| <i>Z</i>                                     | 2                                                                                                        | 2                                                                                                   | 8                                                                  |
| <i>T</i> (K)                                 | 173(2)                                                                                                   | 173(2)                                                                                              | 173(2)                                                             |
| <b>Wavelength (Å)</b>                        | 1.54178                                                                                                  | 0.71073                                                                                             | 0.71073                                                            |
| <b>ρ<sub>calcd</sub> (g·cm<sup>-3</sup>)</b> | 1.311                                                                                                    | 1.275                                                                                               | 1.247                                                              |
| <b><i>F</i>(000)</b>                         | 820                                                                                                      | 804                                                                                                 | 2864                                                               |
| <b>μ (mm<sup>-1</sup>)</b>                   | 2.539                                                                                                    | 0.229                                                                                               | 0.274                                                              |
| <b>crystal size, mm<sup>3</sup></b>          | 0.198×0.111×0.053                                                                                        | 0.2×0.2×0.2                                                                                         | 0.27×0.20×0.16                                                     |
| <b>transmission factors</b>                  | 0.646 – 0.754                                                                                            | 0.6309 – 0.7461                                                                                     | 0.6269 – 0.7456                                                    |
| <b>θ range (deg)</b>                         | 2.510 – 68.228                                                                                           | 3.348 – 26.000                                                                                      | 3.110 – 25.000                                                     |
| <b>data/restraints/param</b>                 | 7007/0/507                                                                                               | 7825/0/506                                                                                          | 6319/525/468                                                       |
| <b>GOF</b>                                   | 1.024                                                                                                    | 1.004                                                                                               | 1.023                                                              |
| <b>R<sub>1</sub> [I &gt; 2σ(I)]</b>          | 0.0790                                                                                                   | 0.0421                                                                                              | 0.0403                                                             |
| <b>wR<sub>2</sub> [all data]</b>             | 0.2498                                                                                                   | 0.1096                                                                                              | 0.1135                                                             |
| <b>residual density, e/Å<sup>3</sup></b>     | 0.580 and -0.888                                                                                         | 0.436 and -0.401                                                                                    | 0.376 and -0.365                                                   |

**Table S2.** Data collection and structure refinement details for complexes.

|                                                                     | <b>3</b>                                                                                      | <b>4-H</b>                                                                                                         | <b>4-Me</b>                                                                     |
|---------------------------------------------------------------------|-----------------------------------------------------------------------------------------------|--------------------------------------------------------------------------------------------------------------------|---------------------------------------------------------------------------------|
| <b>formula</b>                                                      | C <sub>62</sub> H <sub>46</sub> B <sub>4</sub> N <sub>18</sub> O <sub>2</sub> Sc <sub>2</sub> | C <sub>32</sub> H <sub>30</sub> B <sub>2</sub> N <sub>9</sub> O <sub>2</sub> Sc, 2(C <sub>6</sub> H <sub>6</sub> ) | C <sub>33</sub> H <sub>32</sub> B <sub>2</sub> N <sub>9</sub> O <sub>2</sub> Sc |
| <b><i>fw</i></b>                                                    | 1204.42                                                                                       | 795.45                                                                                                             | 653.25                                                                          |
| <b>crystal system</b>                                               | monoclinic                                                                                    | triclinic                                                                                                          | orthorhombic                                                                    |
| <b>space group</b>                                                  | P2/c                                                                                          | P-1                                                                                                                | P212121                                                                         |
| <b><i>a</i> (Å)</b>                                                 | 17.2544(3)                                                                                    | 12.9337(7)                                                                                                         | 13.860(4)                                                                       |
| <b><i>b</i> (Å)</b>                                                 | 11.7447(2)                                                                                    | 13.0637(5)                                                                                                         | 14.896(5)                                                                       |
| <b><i>c</i> (Å)</b>                                                 | 15.3640(2)                                                                                    | 13.3321(7)                                                                                                         | 15.506(5)                                                                       |
| <b><math>\alpha</math> (deg)</b>                                    | 90                                                                                            | 67.293(2)                                                                                                          | 90                                                                              |
| <b><math>\beta</math> (deg)</b>                                     | 104.3550(10)                                                                                  | 82.797(3)                                                                                                          | 90                                                                              |
| <b><math>\gamma</math> (deg)</b>                                    | 90                                                                                            | 75.727(2)                                                                                                          | 90                                                                              |
| <b><i>V</i> (Å<sup>3</sup>)</b>                                     | 3016.27(8)                                                                                    | 2012.73(17)                                                                                                        | 3201.3(18)                                                                      |
| <b><i>Z</i></b>                                                     | 2                                                                                             | 2                                                                                                                  | 4                                                                               |
| <b><i>T</i> (K)</b>                                                 | 173(2)                                                                                        | 173(2)                                                                                                             | 173(2)                                                                          |
| <b>Wavelength (Å)</b>                                               | 1.54178                                                                                       | 0.71073                                                                                                            | 0.71073                                                                         |
| <b><math>\rho_{\text{calcd}}</math> (g·cm<sup>-3</sup>)</b>         | 1.326                                                                                         | 1.313                                                                                                              | 1.355                                                                           |
| <b><i>F</i>(000)</b>                                                | 1252                                                                                          | 832.0                                                                                                              | 1360                                                                            |
| <b><math>\mu</math> (mm<sup>-1</sup>)</b>                           | 2.400                                                                                         | 0.233                                                                                                              | 0.277                                                                           |
| <b>crystal size, mm<sup>3</sup></b>                                 | 0.21×0.13×0.12                                                                                | 0.522×0.462×0.38                                                                                                   | 0.130×0.130×0.100                                                               |
| <b>transmission factors</b>                                         | 0.6219 – 0.7533                                                                               | 0.7270 – 0.9984                                                                                                    | 0.5506 – 0.7455                                                                 |
| <b><math>\theta</math> range (deg)</b>                              | 2.643 – 67.485                                                                                | 1.903 – 27.878                                                                                                     | 2.627 – 24.994                                                                  |
| <b>data/restraints/param</b>                                        | 5307/0/395                                                                                    | 9505/360/617                                                                                                       | 5646/0/428                                                                      |
| <b>GOF</b>                                                          | 1.058                                                                                         | 1.021                                                                                                              | 1.013                                                                           |
| <b>R<sub>1</sub> [<i>I</i> &gt; 2<math>\sigma</math>(<i>I</i>)]</b> | 0.0471                                                                                        | 0.0550                                                                                                             | 0.0646                                                                          |
| <b>wR<sub>2</sub> [all data]</b>                                    | 0.1355                                                                                        | 0.1578                                                                                                             | 0.1452                                                                          |
| <b>residual density, e/Å<sup>3</sup></b>                            | 0.487 and -0.305                                                                              | 0.768 and -0.471                                                                                                   | 0.263 and -0.350                                                                |

**Table S3.** Crystal data collection and refinement parameters for complex.

|                                                                     | <b>5-H</b>                                                                                                                                                       |
|---------------------------------------------------------------------|------------------------------------------------------------------------------------------------------------------------------------------------------------------|
| <b>formula</b>                                                      | C <sub>50</sub> H <sub>30</sub> B <sub>3</sub> F <sub>15</sub> N <sub>9</sub> O <sub>2</sub> Sc <sub>2</sub> (C <sub>3</sub> H <sub>9</sub> O <sub>0.5</sub> Si) |
| <b><i>fw</i></b>                                                    | 1313.60                                                                                                                                                          |
| <b>crystal system</b>                                               | monoclinic                                                                                                                                                       |
| <b>space group</b>                                                  | C2/c                                                                                                                                                             |
| <b><i>a</i> (Å)</b>                                                 | 36.353(4)                                                                                                                                                        |
| <b><i>b</i> (Å)</b>                                                 | 12.6079(14)                                                                                                                                                      |
| <b><i>c</i> (Å)</b>                                                 | 30.349(3)                                                                                                                                                        |
| <b><math>\alpha</math> (deg)</b>                                    | 90                                                                                                                                                               |
| <b><math>\beta</math> (deg)</b>                                     | 116.768(3)                                                                                                                                                       |
| <b><math>\gamma</math> (deg)</b>                                    | 90                                                                                                                                                               |
| <b><i>V</i> (Å<sup>3</sup>)</b>                                     | 12419(2)                                                                                                                                                         |
| <b><i>Z</i></b>                                                     | 8                                                                                                                                                                |
| <b><i>T</i> (K)</b>                                                 | 173(2)                                                                                                                                                           |
| <b>Wavelength (Å)</b>                                               | 0.71073                                                                                                                                                          |
| <b><math>\rho_{\text{calcd}}</math> (g·cm<sup>-3</sup>)</b>         | 1.405                                                                                                                                                            |
| <b><i>F</i>(000)</b>                                                | 5360                                                                                                                                                             |
| <b><math>\mu</math> (mm<sup>-1</sup>)</b>                           | 0.253                                                                                                                                                            |
| <b>crystal size, mm<sup>3</sup></b>                                 | 0.300×0.200×0.100                                                                                                                                                |
| <b>transmission factors</b>                                         | 0.6335 – 0.7455                                                                                                                                                  |
| <b><math>\theta</math> range (deg)</b>                              | 1.503 – 25.000                                                                                                                                                   |
| <b>data/restraints/param</b>                                        | 10596/0/820                                                                                                                                                      |
| <b>GOF</b>                                                          | 1.016                                                                                                                                                            |
| <b>R<sub>1</sub> [<i>I</i> &gt; 2<math>\sigma</math>(<i>I</i>)]</b> | 0.0533                                                                                                                                                           |
| <b>wR<sub>2</sub> [all data]</b>                                    | 0.1482                                                                                                                                                           |
| <b>residual density, e/Å<sup>3</sup></b>                            | 0.713 and -0.533                                                                                                                                                 |

Cartesian coordinates of all optimized structures

ScH monomer **2-H**

73

|    |         |          |         |
|----|---------|----------|---------|
| C  | 7.99134 | 6.03529  | 5.56303 |
| C  | 6.97736 | 6.44851  | 4.70778 |
| N  | 5.88850 | 5.68562  | 4.91772 |
| N  | 6.17092 | 4.75713  | 5.86249 |
| C  | 7.43040 | 4.97301  | 6.26978 |
| B  | 4.50846 | 5.60327  | 4.13501 |
| C  | 4.62581 | 4.18139  | 3.32685 |
| N  | 4.46018 | 3.00880  | 3.99684 |
| C  | 4.60057 | 1.80606  | 3.37662 |
| C  | 5.02144 | 1.76585  | 2.04198 |
| C  | 5.26684 | 2.94497  | 1.35157 |
| C  | 5.04724 | 4.15686  | 1.99214 |
| Sc | 4.78724 | 3.05389  | 6.33600 |
| N  | 6.13918 | 1.30769  | 5.93074 |
| N  | 5.83731 | 0.34583  | 5.02614 |
| C  | 6.91131 | -0.44545 | 4.84675 |
| C  | 7.93473 | -0.01592 | 5.68249 |
| C  | 7.39529 | 1.08539  | 6.34488 |
| B  | 4.45700 | 0.42133  | 4.24292 |
| C  | 4.16039 | -0.92482 | 3.38883 |
| C  | 3.38630 | -0.89947 | 2.21568 |
| C  | 3.02031 | -2.06147 | 1.53819 |
| C  | 3.40451 | -3.32234 | 2.00416 |
| C  | 4.13874 | -3.37106 | 3.19348 |
| C  | 4.49586 | -2.20493 | 3.86781 |
| C  | 3.04827 | -4.57699 | 1.25236 |

|   |         |          |         |
|---|---------|----------|---------|
| H | 5.01240 | 3.09034  | 8.18684 |
| N | 3.27785 | 1.45753  | 6.28733 |
| N | 3.30676 | 0.50907  | 5.32351 |
| C | 2.26066 | -0.32506 | 5.49769 |
| C | 1.53385 | 0.08695  | 6.60532 |
| C | 2.22008 | 1.20820  | 7.06920 |
| N | 3.30502 | 4.67231  | 6.21558 |
| N | 3.35424 | 5.58056  | 5.21466 |
| C | 2.31984 | 6.43653  | 5.34789 |
| C | 1.58017 | 6.08054  | 6.46642 |
| C | 2.24646 | 4.96879  | 6.97968 |
| C | 4.23837 | 6.91911  | 3.22685 |
| C | 4.59523 | 8.21102  | 3.65617 |
| C | 4.26015 | 9.35572  | 2.93541 |
| C | 3.52773 | 9.27302  | 1.74683 |
| C | 3.12270 | 8.00167  | 1.32956 |
| C | 3.46674 | 6.86106  | 2.05333 |
| C | 3.19470 | 10.50328 | 0.94568 |
| H | 2.18047 | 7.24352  | 4.64621 |
| H | 5.22818 | 5.09176  | 1.47374 |
| H | 2.02149 | 1.83681  | 7.92606 |
| H | 5.18216 | 0.80660  | 1.56299 |
| H | 5.12430 | 8.33821  | 4.59762 |
| H | 5.62443 | 2.91975  | 0.32462 |
| H | 7.83438 | 1.71882  | 7.10345 |
| H | 3.03867 | 0.05330  | 1.82459 |
| H | 2.03270 | 4.37826  | 7.85966 |
| H | 6.88485 | -1.25722 | 4.13659 |
| H | 2.41914 | -1.98621 | 0.63403 |
| H | 4.42538 | -4.33677 | 3.60570 |



|   |         |          |         |
|---|---------|----------|---------|
| H | 5.02547 | -2.30452 | 4.81229 |
| H | 6.96709 | 7.23040  | 3.96444 |
| H | 3.10339 | 5.89975  | 1.69929 |
| H | 8.91877 | -0.44574 | 5.79288 |
| H | 7.85621 | 4.36399  | 7.05545 |
| H | 2.10522 | -1.15793 | 4.83063 |
| H | 0.69489 | 6.56425  | 6.85044 |
| H | 4.56273 | 10.33178 | 3.31016 |
| H | 0.64399 | -0.36733 | 7.01388 |
| H | 2.52243 | 7.90143  | 0.42723 |
| H | 8.98308 | 6.45094  | 5.65755 |
| H | 2.11599 | -4.45797 | 0.69202 |
| H | 2.93227 | -5.43048 | 1.92729 |
| H | 3.83065 | -4.83926 | 0.52913 |
| H | 3.08538 | 11.38300 | 1.58728 |
| H | 2.26511 | 10.37591 | 0.38273 |
| H | 3.98609 | 10.72777 | 0.21956 |

ScH dimer [2-H]<sub>2</sub>

146

|   |          |         |          |
|---|----------|---------|----------|
| C | 8.02107  | 6.96586 | 11.95474 |
| C | 8.39582  | 5.73352 | 11.38955 |
| C | 9.68702  | 5.28178 | 11.71371 |
| C | 10.55980 | 6.02754 | 12.50436 |
| C | 10.18412 | 7.27147 | 13.02151 |
| C | 8.89019  | 7.72079 | 12.74056 |
| B | 7.33511  | 4.79975 | 10.59503 |
| C | 7.95728  | 3.80588 | 9.45030  |
| N | 7.21233  | 2.77636 | 8.96549  |
| C | 7.66706  | 2.00303 | 7.93960  |

|    |          |          |          |
|----|----------|----------|----------|
| C  | 8.84452  | 2.36002  | 7.27326  |
| C  | 9.59203  | 3.44634  | 7.70544  |
| C  | 9.16352  | 4.14590  | 8.82374  |
| Sc | 4.84563  | 2.76976  | 9.38048  |
| H  | 3.28688  | 1.88706  | 10.19903 |
| Sc | 1.54920  | 2.75502  | 9.84586  |
| H  | 3.11031  | 3.65374  | 9.05299  |
| B  | 6.78105  | 0.72056  | 7.43452  |
| C  | 7.56086  | -0.41812 | 6.57733  |
| C  | 6.87287  | -1.29435 | 5.71716  |
| C  | 7.50370  | -2.35505 | 5.06936  |
| C  | 8.86441  | -2.61291 | 5.26176  |
| C  | 9.55459  | -1.78352 | 6.15073  |
| C  | 8.91701  | -0.72222 | 6.79131  |
| C  | 9.55971  | -3.73377 | 4.53589  |
| C  | 11.13965 | 8.09762  | 13.84081 |
| N  | 1.22119  | 1.00376  | 8.48292  |
| N  | 0.11395  | 0.84100  | 7.71996  |
| C  | 0.06096  | -0.43015 | 7.28009  |
| C  | 1.18280  | -1.11216 | 7.73418  |
| C  | 1.88173  | -0.16542 | 8.48150  |
| B  | -0.96698 | 1.99187  | 7.64742  |
| C  | -1.57179 | 2.08940  | 9.16663  |
| N  | -0.83296 | 2.67391  | 10.15117 |
| C  | -1.33657 | 2.82922  | 11.40512 |
| C  | -2.59026 | 2.29022  | 11.72245 |
| C  | -3.31209 | 1.58912  | 10.76814 |
| C  | -2.80339 | 1.50376  | 9.47989  |
| B  | -0.38876 | 3.42329  | 12.60209 |
| C  | -1.15959 | 3.93680  | 13.93259 |

|   |          |         |          |
|---|----------|---------|----------|
| C | -2.40199 | 4.59073 | 13.85624 |
| C | -3.02035 | 5.14827 | 14.97396 |
| C | -2.42295 | 5.08599 | 16.23702 |
| C | -1.17001 | 4.47185 | 16.32640 |
| C | -0.55501 | 3.92286 | 15.20225 |
| C | -3.10694 | 5.65009 | 17.45395 |
| N | 0.73233  | 3.86717 | 8.06856  |
| N | -0.24164 | 3.34536 | 7.29284  |
| C | -0.55127 | 4.22115 | 6.31214  |
| C | 0.24161  | 5.34922 | 6.45462  |
| C | 1.03049  | 5.07433 | 7.57314  |
| N | 1.43175  | 4.52772 | 11.14418 |
| N | 0.52785  | 4.62397 | 12.14693 |
| C | 0.60422  | 5.85688 | 12.68950 |
| C | 1.58464  | 6.58200 | 12.02826 |
| C | 2.07951  | 5.69911 | 11.06940 |
| N | 1.33182  | 1.71876 | 11.88669 |
| N | 0.54235  | 2.17517 | 12.88614 |
| C | 0.45601  | 1.24032 | 13.85378 |
| C | 1.23531  | 0.14990 | 13.49454 |
| C | 1.76239  | 0.50275 | 12.25081 |
| C | -2.03430 | 1.73832 | 6.44906  |
| C | -1.64598 | 1.17865 | 5.21759  |
| C | -2.51822 | 1.07468 | 4.13527  |
| C | -3.83204 | 1.54569 | 4.21791  |
| C | -4.22286 | 2.14797 | 5.41763  |
| C | -3.34576 | 2.24377 | 6.49668  |
| C | -4.78929 | 1.40429 | 3.06450  |
| N | 4.68138  | 2.14109 | 7.23576  |
| N | 5.58966  | 1.35440 | 6.61041  |

|   |          |          |          |
|---|----------|----------|----------|
| C | 5.38755  | 1.41459  | 5.28080  |
| C | 4.29372  | 2.23233  | 5.02678  |
| C | 3.88372  | 2.66024  | 6.28850  |
| N | 5.45559  | 0.61830  | 9.62709  |
| N | 6.18918  | -0.02156 | 8.69189  |
| C | 6.42637  | -1.28818 | 9.09707  |
| C | 5.83259  | -1.47899 | 10.33502 |
| C | 5.23564  | -0.24990 | 10.62166 |
| N | 5.42511  | 3.28332  | 11.43945 |
| N | 6.50986  | 4.04606  | 11.70985 |
| C | 6.69899  | 4.08124  | 13.04512 |
| C | 5.71068  | 3.32819  | 13.66220 |
| C | 4.93088  | 2.85275  | 12.60897 |
| N | 5.31525  | 5.00268  | 9.09278  |
| N | 6.32185  | 5.64893  | 9.72501  |
| C | 6.46023  | 6.88487  | 9.20388  |
| C | 5.49865  | 7.06681  | 8.22029  |
| C | 4.80741  | 5.85407  | 8.19102  |
| H | 2.82522  | -0.24746 | 9.00356  |
| H | 1.45144  | -2.13990 | 7.54192  |
| H | -0.76736 | -0.76990 | 6.67770  |
| H | 1.78638  | 5.67890  | 8.05208  |
| H | 0.24251  | 6.23577  | 5.83846  |
| H | -1.31154 | 3.98611  | 5.58456  |
| H | -0.62350 | 0.83459  | 5.08206  |
| H | -2.16690 | 0.63050  | 3.20565  |
| H | -5.22772 | 2.55650  | 5.50789  |
| H | -3.69241 | 2.74961  | 7.39395  |
| H | -4.26521 | 1.41663  | 2.10388  |
| H | -5.53028 | 2.20947  | 3.05746  |

|   |          |          |          |
|---|----------|----------|----------|
| H | -5.33999 | 0.45694  | 3.12164  |
| H | -3.34922 | 0.97246  | 8.70849  |
| H | -4.26052 | 1.12135  | 11.02285 |
| H | -2.96840 | 2.38694  | 12.73372 |
| H | 2.87289  | 5.82743  | 10.34583 |
| H | 1.89700  | 7.59650  | 12.22445 |
| H | -0.03427 | 6.13527  | 13.51273 |
| H | 2.41995  | -0.05010 | 11.59591 |
| H | 1.39377  | -0.76024 | 14.05331 |
| H | -0.15916 | 1.40458  | 14.72482 |
| H | -2.89717 | 4.68435  | 12.89268 |
| H | -3.98189 | 5.64588  | 14.86159 |
| H | -0.66170 | 4.43307  | 17.28810 |
| H | 0.43881  | 3.49704  | 15.31954 |
| H | -3.71340 | 6.52609  | 17.20372 |
| H | -2.38356 | 5.94554  | 18.21994 |
| H | -3.77830 | 4.91076  | 17.90855 |
| H | 3.05596  | 3.29477  | 6.57423  |
| H | 3.85916  | 2.47226  | 4.06816  |
| H | 6.03157  | 0.87820  | 4.60115  |
| H | 4.67064  | 0.05936  | 11.48858 |
| H | 5.83645  | -2.37579 | 10.93616 |
| H | 6.99961  | -1.96404 | 8.48271  |
| H | 5.80409  | -1.16700 | 5.56313  |
| H | 6.92474  | -3.00079 | 4.41154  |
| H | 10.60704 | -1.97480 | 6.35220  |
| H | 9.49412  | -0.12902 | 7.49563  |
| H | 8.87548  | -4.56155 | 4.32567  |
| H | 10.40017 | -4.12668 | 5.11608  |
| H | 9.96114  | -3.39222 | 3.57349  |

|   |          |         |          |
|---|----------|---------|----------|
| H | 9.15906  | 1.78736 | 6.40812  |
| H | 10.49872 | 3.74019 | 7.18123  |
| H | 9.73255  | 4.99168 | 9.19224  |
| H | 4.03611  | 2.24556 | 12.62133 |
| H | 5.57505  | 3.16171 | 14.72011 |
| H | 7.51530  | 4.64328 | 13.46992 |
| H | 3.97990  | 5.54488 | 7.56929  |
| H | 5.32902  | 7.94689 | 7.61833  |
| H | 7.23507  | 7.54790 | 9.55637  |
| H | 10.01937 | 4.31064 | 11.35476 |
| H | 11.54903 | 5.63256 | 12.72851 |
| H | 8.55288  | 8.66990 | 13.15314 |
| H | 7.01097  | 7.33991 | 11.80410 |
| H | 11.80707 | 7.46685 | 14.43620 |
| H | 10.60780 | 8.76768 | 14.52304 |
| H | 11.77275 | 8.72262 | 13.19854 |

ScMe Monomer **2-Me**

76

|   |         |         |         |
|---|---------|---------|---------|
| C | 3.47868 | 6.81762 | 2.10711 |
| C | 4.23673 | 6.85356 | 3.29032 |
| C | 4.58715 | 8.13721 | 3.74876 |
| C | 4.25802 | 9.29556 | 3.04740 |
| C | 3.53834 | 9.23541 | 1.84968 |
| C | 3.14044 | 7.97198 | 1.40256 |
| B | 4.50028 | 5.52058 | 4.17619 |
| N | 3.33393 | 5.47606 | 5.24297 |
| N | 3.27511 | 4.55801 | 6.23407 |
| C | 2.19439 | 4.83337 | 6.97448 |
| C | 1.52416 | 5.94077 | 6.45679 |

|    |         |          |         |
|----|---------|----------|---------|
| C  | 2.28474 | 6.31674  | 5.35945 |
| Sc | 4.77317 | 2.93812  | 6.37536 |
| N  | 3.23536 | 1.35498  | 6.24450 |
| N  | 3.27413 | 0.42598  | 5.26254 |
| C  | 2.20876 | -0.39256 | 5.38939 |
| C  | 1.45783 | 0.00941  | 6.48412 |
| C  | 2.15075 | 1.10852  | 6.98936 |
| B  | 4.43831 | 0.34671  | 4.19544 |
| C  | 4.14219 | -0.98482 | 3.31754 |
| C  | 3.38156 | -0.93644 | 2.13634 |
| C  | 3.01412 | -2.08562 | 1.43812 |
| C  | 3.38384 | -3.35606 | 1.88978 |
| C  | 4.10557 | -3.42766 | 3.08553 |
| C  | 4.46385 | -2.27417 | 3.78076 |
| C  | 3.02566 | -4.59690 | 1.11619 |
| C  | 3.21145 | 10.48090 | 1.06976 |
| N  | 5.87384 | 5.59362  | 4.96914 |
| C  | 6.96588 | 6.35234  | 4.75887 |
| C  | 7.98348 | 5.92379  | 5.60161 |
| C  | 7.42053 | 4.85739  | 6.30078 |
| N  | 6.15633 | 4.65354  | 5.90187 |
| C  | 4.62797 | 4.11499  | 3.34434 |
| N  | 4.45629 | 2.93340  | 3.99478 |
| C  | 4.59945 | 1.74307  | 3.35375 |
| C  | 5.03366 | 1.72317  | 2.02261 |
| C  | 5.28784 | 2.91303  | 1.35425 |
| C  | 5.06213 | 4.11393  | 2.01320 |
| N  | 6.11358 | 1.18537  | 5.91597 |
| N  | 5.80994 | 0.24630  | 4.98886 |
| C  | 6.88350 | -0.54013 | 4.78571 |

|   |         |          |         |
|---|---------|----------|---------|
| C | 7.90984 | -0.13083 | 5.62751 |
| C | 7.37169 | 0.95336  | 6.31875 |
| C | 5.10745 | 2.94183  | 8.56689 |
| H | 2.15054 | 7.12806  | 4.66191 |
| H | 5.24793 | 5.05747  | 1.51226 |
| H | 1.93260 | 1.72463  | 7.85069 |
| H | 5.19685 | 0.77149  | 1.52929 |
| H | 5.10747 | 8.24599  | 4.69747 |
| H | 5.65553 | 2.90467  | 0.33055 |
| H | 7.81576 | 1.56892  | 7.08886 |
| H | 3.04604 | 0.02489  | 1.75582 |
| H | 6.85417 | -1.33434 | 4.05607 |
| H | 2.42346 | -1.99270 | 0.52865 |
| H | 4.38124 | -4.40149 | 3.48603 |
| H | 4.98400 | -2.39101 | 4.72858 |
| H | 6.95431 | 7.14232  | 4.02415 |
| H | 3.12144 | 5.86281  | 1.72998 |
| H | 8.89472 | -0.56226 | 5.72342 |
| H | 7.85108 | 4.23614  | 7.07398 |
| H | 2.05726 | -1.20811 | 4.70044 |
| H | 0.62315 | 6.40817  | 6.82409 |
| H | 4.55518 | 10.26446 | 3.44449 |
| H | 0.54831 | -0.43619 | 6.85748 |
| H | 2.55048 | 7.88879  | 0.49170 |
| H | 8.97874 | 6.33174  | 5.69301 |
| H | 2.09482 | -4.46579 | 0.55605 |
| H | 2.90571 | -5.46122 | 1.77650 |
| H | 3.80862 | -4.84932 | 0.39009 |
| H | 3.09977 | 11.34865 | 1.72705 |
| H | 2.28474 | 10.36546 | 0.49947 |



|   |         |          |         |
|---|---------|----------|---------|
| H | 4.00699 | 10.71774 | 0.35214 |
| H | 1.96285 | 4.23066  | 7.84178 |
| H | 4.66779 | 2.06156  | 9.06049 |
| H | 6.17901 | 2.92992  | 8.82645 |
| H | 4.68897 | 3.83577  | 9.05428 |

CO2

3

|   |         |         |         |
|---|---------|---------|---------|
| O | 2.95015 | 0.13859 | 4.64268 |
| C | 2.09914 | 0.17047 | 5.43646 |
| O | 1.24678 | 0.20232 | 6.22920 |

ScH CO2 insertion adduct

76

|    |          |          |          |
|----|----------|----------|----------|
| C  | -1.12263 | -3.96182 | -2.40047 |
| C  | -0.34060 | -3.96580 | -1.23231 |
| C  | 0.00898  | -5.23684 | -0.73951 |
| C  | -0.34289 | -6.41441 | -1.39644 |
| C  | -1.08562 | -6.38700 | -2.58117 |
| C  | -1.48331 | -5.13543 | -3.06061 |
| B  | -0.05273 | -2.60715 | -0.39515 |
| N  | -1.19713 | -2.51754 | 0.68730  |
| N  | -1.22242 | -1.55764 | 1.63895  |
| C  | -2.27024 | -1.80339 | 2.43519  |
| C  | -2.95416 | -2.93440 | 1.99121  |
| C  | -2.23577 | -3.35649 | 0.88176  |
| Sc | 0.26784  | 0.05217  | 1.65442  |
| N  | 1.66009  | 1.74853  | 1.16591  |
| N  | 1.36747  | 2.66469  | 0.21037  |
| C  | 2.45738  | 3.41731  | -0.02798 |

|   |          |          |          |
|---|----------|----------|----------|
| C | 3.48214  | 3.01230  | 0.81807  |
| C | 2.92802  | 1.96348  | 1.54955  |
| B | -0.01855 | 2.57713  | -0.56409 |
| N | -1.16619 | 2.57060  | 0.51863  |
| N | -1.20536 | 1.67336  | 1.52902  |
| C | -2.25540 | 1.97803  | 2.30160  |
| C | -2.92688 | 3.08421  | 1.78240  |
| C | -2.19855 | 3.42889  | 0.65281  |
| C | -1.43692 | -7.65414 | -3.31410 |
| N | 1.63964  | -1.68872 | 1.27580  |
| C | 2.90557  | -1.89422 | 1.67106  |
| C | 3.44557  | -2.99460 | 1.00790  |
| C | 2.41441  | -3.44045 | 0.19067  |
| N | 1.33406  | -2.66090 | 0.38147  |
| N | -0.07038 | -0.02079 | -0.67050 |
| C | 0.07440  | -1.23059 | -1.27705 |
| C | 0.48945  | -1.28446 | -2.61292 |
| C | 0.72643  | -0.11302 | -3.31884 |
| C | 0.50710  | 1.10530  | -2.69086 |
| C | 0.09161  | 1.14470  | -1.35476 |
| C | -0.28950 | 3.88249  | -1.48687 |
| C | -1.07068 | 3.81238  | -2.65334 |
| C | -1.41911 | 4.94531  | -3.38704 |
| C | -1.00909 | 6.22064  | -2.98728 |
| C | -0.26654 | 6.31555  | -1.80591 |
| C | 0.07287  | 5.17855  | -1.07509 |
| C | -1.34770 | 7.44247  | -3.79895 |
| O | 2.96331  | 0.13880  | 4.65003  |
| C | 2.07792  | 0.16987  | 5.41697  |
| O | 1.25484  | 0.20272  | 6.24134  |

|   |          |          |          |
|---|----------|----------|----------|
| H | 0.26536  | 0.11308  | 3.51810  |
| H | -2.34392 | 4.22920  | -0.05540 |
| H | 0.68405  | 2.03477  | -3.22020 |
| H | -2.45997 | -1.16537 | 3.28684  |
| H | 0.65283  | -2.24877 | -3.08062 |
| H | 0.61004  | 5.31537  | -0.13957 |
| H | 1.07865  | -0.14909 | -4.34731 |
| H | 3.34962  | -1.25277 | 2.41981  |
| H | -1.48128 | -3.01721 | -2.80135 |
| H | 2.38626  | -4.25642 | -0.51464 |
| H | -2.09119 | -5.07675 | -3.96151 |
| H | -0.04529 | -7.37232 | -0.97390 |
| H | 0.54621  | -5.31995 | 0.20229  |
| H | 2.44005  | 4.18683  | -0.78403 |
| H | -1.43851 | 2.84775  | -2.99355 |
| H | 4.43600  | -3.41269 | 1.10556  |
| H | 3.36302  | 1.36625  | 2.33908  |
| H | -2.39135 | -4.19935 | 0.22734  |
| H | -3.80795 | 3.57243  | 2.17045  |
| H | 0.04051  | 7.29533  | -1.44474 |
| H | -3.83694 | -3.38912 | 2.41445  |
| H | -2.02695 | 4.83583  | -4.28320 |
| H | 4.47749  | 3.42379  | 0.89055  |
| H | -0.65652 | -7.92086 | -4.03780 |
| H | -2.37293 | -7.54911 | -3.87102 |
| H | -1.54356 | -8.49917 | -2.62709 |
| H | -0.56160 | 7.65920  | -4.53311 |
| H | -1.45227 | 8.32889  | -3.16582 |
| H | -2.28140 | 7.30938  | -4.35370 |
| H | -2.45573 | 1.39725  | 3.19094  |

ScH CO2 insertion TS

76

|    |         |          |          |
|----|---------|----------|----------|
| C  | 7.40690 | 1.18582  | 6.27681  |
| N  | 6.12328 | 1.37502  | 5.93110  |
| N  | 5.80536 | 0.40414  | 5.03692  |
| C  | 6.89140 | -0.35475 | 4.80174  |
| C  | 7.94232 | 0.10063  | 5.58677  |
| Sc | 4.72309 | 3.11950  | 6.32329  |
| O  | 6.66060 | 3.17845  | 8.69067  |
| C  | 5.82392 | 3.21012  | 9.52461  |
| O  | 5.18290 | 3.24402  | 10.49879 |
| B  | 4.41636 | 0.45411  | 4.26370  |
| C  | 4.54108 | 1.83682  | 3.39345  |
| N  | 4.39703 | 3.04593  | 4.00443  |
| C  | 4.55912 | 4.21017  | 3.31550  |
| C  | 4.97561 | 4.16969  | 1.97992  |
| C  | 5.19609 | 2.95292  | 1.35088  |
| C  | 4.95689 | 1.78344  | 2.05795  |
| B  | 4.45117 | 5.64831  | 4.09334  |
| C  | 4.18968 | 6.95033  | 3.16224  |
| C  | 3.40919 | 6.88103  | 1.99530  |
| C  | 3.06654 | 8.01389  | 1.25866  |
| C  | 3.48173 | 9.28830  | 1.65594  |
| C  | 4.22346 | 9.38261  | 2.83789  |
| C  | 4.55708 | 8.24575  | 3.57155  |
| C  | 3.14942 | 10.50982 | 0.84119  |
| N  | 3.27096 | 4.75913  | 6.17908  |
| C  | 2.21340 | 5.05708  | 6.94536  |
| C  | 1.53178 | 6.15204  | 6.41526  |

|   |         |          |         |
|---|---------|----------|---------|
| C | 2.26179 | 6.49961  | 5.28772 |
| N | 3.30322 | 5.65093  | 5.16492 |
| N | 3.25302 | 1.49022  | 6.29052 |
| N | 3.27208 | 0.53429  | 5.33612 |
| C | 2.22446 | -0.29565 | 5.51926 |
| C | 1.50361 | 0.13069  | 6.62540 |
| C | 2.19713 | 1.25192  | 7.07967 |
| N | 6.14347 | 4.81848  | 5.82177 |
| N | 5.83891 | 5.73265  | 4.86556 |
| C | 6.93377 | 6.46326  | 4.58601 |
| C | 7.97731 | 6.04828  | 5.40267 |
| C | 7.42805 | 5.01577  | 6.15941 |
| C | 4.13773 | -0.90225 | 3.41871 |
| C | 4.49363 | -2.17259 | 3.90875 |
| C | 4.14790 | -3.35049 | 3.24919 |
| C | 3.40501 | -3.32422 | 2.06453 |
| C | 3.00074 | -2.07365 | 1.58802 |
| C | 3.35538 | -0.89964 | 2.25082 |
| C | 3.06051 | -4.59150 | 1.32859 |
| H | 4.19907 | 3.18313  | 8.11327 |
| H | 2.11336 | 7.29563  | 4.57516 |
| H | 5.15279 | 5.09996  | 1.45232 |
| H | 2.01482 | 1.89034  | 7.93182 |
| H | 5.11972 | 0.81827  | 1.59210 |
| H | 5.09487 | 8.38189  | 4.50689 |
| H | 5.54980 | 2.91660  | 0.32296 |
| H | 7.86923 | 1.82932  | 7.01080 |
| H | 2.99142 | 0.04396  | 1.85226 |
| H | 6.85206 | -1.16406 | 4.08935 |
| H | 2.39246 | -2.01607 | 0.68732 |

|   |         |          |         |
|---|---------|----------|---------|
| H | 4.45052 | -4.30781 | 3.66952 |
| H | 5.03233 | -2.25463 | 4.84989 |
| H | 6.90558 | 7.22540  | 3.82287 |
| H | 3.03702 | 5.91738  | 1.65697 |
| H | 8.94245 | -0.30109 | 5.64713 |
| H | 7.88095 | 4.41622  | 6.93536 |
| H | 2.06639 | -1.13537 | 4.86122 |
| H | 0.64366 | 6.63276  | 6.79671 |
| H | 4.53445 | 10.36184 | 3.19720 |
| H | 0.61356 | -0.31639 | 7.04162 |
| H | 2.45909 | 7.90505  | 0.36215 |
| H | 8.98157 | 6.44235  | 5.44062 |
| H | 3.84368 | -4.85400 | 0.60631 |
| H | 2.12542 | -4.48923 | 0.76963 |
| H | 2.95555 | -5.43811 | 2.01393 |
| H | 3.93933 | 10.72411 | 0.11038 |
| H | 3.04378 | 11.39724 | 1.47276 |
| H | 2.21799 | 10.37801 | 0.28236 |
| H | 2.02135 | 4.47755  | 7.83654 |

ScH CO<sub>2</sub> k<sup>1</sup> kinetic insertion product

76

|    |         |          |         |
|----|---------|----------|---------|
| C  | 2.81944 | -1.88742 | 1.75376 |
| N  | 1.56640 | -1.69694 | 1.31012 |
| N  | 1.30335 | -2.66613 | 0.40057 |
| C  | 2.39924 | -3.43237 | 0.24446 |
| C  | 3.39366 | -2.97784 | 1.10129 |
| Sc | 0.21944 | 0.05270  | 1.64423 |
| O  | 0.47260 | 0.11509  | 3.61705 |
| C  | 1.40446 | 0.13841  | 4.52870 |

|   |          |          |          |
|---|----------|----------|----------|
| O | 2.60950  | 0.12592  | 4.32407  |
| B | -0.05459 | -2.60816 | -0.40902 |
| C | 0.09508  | -1.23050 | -1.28441 |
| N | -0.03171 | -0.02084 | -0.67163 |
| C | 0.11048  | 1.14482  | -1.36172 |
| C | 0.51560  | 1.10554  | -2.70056 |
| C | 0.73775  | -0.11209 | -3.32847 |
| C | 0.49954  | -1.28340 | -2.62311 |
| B | -0.02541 | 2.57771  | -0.57733 |
| C | -0.28946 | 3.87921  | -1.50714 |
| C | -1.06813 | 3.80498  | -2.67543 |
| C | -1.40908 | 4.93432  | -3.41782 |
| C | -0.99437 | 6.21055  | -3.02522 |
| C | -0.25507 | 6.30981  | -1.84235 |
| C | 0.07756  | 5.17611  | -1.10301 |
| C | -1.32463 | 7.42834  | -3.84629 |
| N | -1.29481 | 1.64333  | 1.46935  |
| C | -2.37614 | 1.94257  | 2.20055  |
| C | -3.01769 | 3.06243  | 1.67481  |
| C | -2.24016 | 3.41970  | 0.58260  |
| N | -1.20819 | 2.55773  | 0.47646  |
| N | -1.30814 | -1.53221 | 1.57644  |
| N | -1.23349 | -2.50957 | 0.64446  |
| C | -2.26892 | -3.35718 | 0.81395  |
| C | -3.03653 | -2.92538 | 1.88603  |
| C | -2.38545 | -1.77734 | 2.33328  |
| N | 1.58318  | 1.76417  | 1.20066  |
| N | 1.33115  | 2.67506  | 0.23005  |
| C | 2.43444  | 3.41936  | 0.02747  |
| C | 3.42299  | 3.01151  | 0.91407  |

|   |          |          |          |
|---|----------|----------|----------|
| C | 2.83728  | 1.97084  | 1.63406  |
| C | -0.33312 | -3.96355 | -1.25401 |
| C | 0.02552  | -5.23551 | -0.77083 |
| C | -0.31621 | -6.41052 | -1.43797 |
| C | -1.05672 | -6.37956 | -2.62382 |
| C | -1.46388 | -5.12726 | -3.09379 |
| C | -1.11387 | -3.95646 | -2.42337 |
| C | -1.39574 | -7.64331 | -3.36825 |
| H | 1.00611  | 0.17223  | 5.56059  |
| H | -2.35266 | 4.23069  | -0.11919 |
| H | 0.68211  | 2.03542  | -3.23219 |
| H | -2.62848 | -1.12526 | 3.16067  |
| H | 0.65361  | -2.24770 | -3.09354 |
| H | 0.61306  | 5.31694  | -0.16733 |
| H | 1.08726  | -0.14775 | -4.35783 |
| H | 3.21201  | -1.24186 | 2.52947  |
| H | -1.47963 | -3.01149 | -2.81711 |
| H | 2.40666  | -4.24515 | -0.46515 |
| H | -2.07039 | -5.06613 | -3.99545 |
| H | -0.01138 | -7.36937 | -1.02280 |
| H | 0.56208  | -5.32216 | 0.17082  |
| H | 2.45046  | 4.18491  | -0.73273 |
| H | -1.43978 | 2.83984  | -3.01018 |
| H | 4.38452  | -3.38546 | 1.23328  |
| H | 3.22238  | 1.37283  | 2.45061  |
| H | -2.38997 | -4.21201 | 0.16795  |
| H | -3.91233 | 3.54883  | 2.03282  |
| H | 0.05563  | 7.29050  | -1.48686 |
| H | -3.93099 | -3.38254 | 2.28108  |
| H | -2.01457 | 4.82162  | -4.31518 |



|   |          |          |          |
|---|----------|----------|----------|
| H | 4.41746  | 3.41744  | 1.02191  |
| H | -0.61279 | -7.89556 | -4.09435 |
| H | -2.33277 | -7.54242 | -3.92425 |
| H | -1.49387 | -8.49562 | -2.68902 |
| H | -0.53733 | 7.63340  | -4.58251 |
| H | -1.42230 | 8.32047  | -3.22015 |
| H | -2.25953 | 7.29770  | -4.39962 |
| H | -2.62916 | 1.34694  | 3.06661  |

ScH eta2 coordination **TS<sub>2-H</sub>**

76

|    |          |          |          |
|----|----------|----------|----------|
| C  | -1.13747 | -3.95450 | -2.41891 |
| C  | -0.33409 | -3.96367 | -1.26511 |
| C  | 0.02426  | -5.23674 | -0.78451 |
| C  | -0.33990 | -6.41134 | -1.44035 |
| C  | -1.10393 | -6.37872 | -2.61119 |
| C  | -1.51014 | -5.12492 | -3.07781 |
| B  | -0.03396 | -2.60777 | -0.42798 |
| N  | -1.18642 | -2.50428 | 0.64762  |
| N  | -1.22273 | -1.52972 | 1.58326  |
| C  | -2.27708 | -1.76685 | 2.37413  |
| C  | -2.95287 | -2.90709 | 1.94306  |
| C  | -2.22345 | -3.34354 | 0.84637  |
| Sc | 0.30038  | 0.05486  | 1.62222  |
| N  | 1.66478  | 1.76213  | 1.13565  |
| N  | 1.38018  | 2.67254  | 0.17164  |
| C  | 2.47738  | 3.41257  | -0.07274 |
| C  | 3.49685  | 3.00512  | 0.77821  |
| C  | 2.93523  | 1.96773  | 1.52044  |
| B  | 0.00347  | 2.57699  | -0.60550 |

|   |          |          |          |
|---|----------|----------|----------|
| N | -1.15238 | 2.56085  | 0.47123  |
| N | -1.20375 | 1.65091  | 1.46904  |
| C | -2.26050 | 1.94955  | 2.23542  |
| C | -2.92270 | 3.06485  | 1.72526  |
| C | -2.18253 | 3.42090  | 0.60685  |
| C | -1.46852 | -7.64252 | -3.34339 |
| N | 1.64076  | -1.70106 | 1.25449  |
| C | 2.90782  | -1.89964 | 1.65390  |
| C | 3.45438  | -2.99202 | 0.98268  |
| C | 2.42935  | -3.43978 | 0.15909  |
| N | 1.34302  | -2.66924 | 0.35255  |
| O | 0.26223  | 0.12752  | 3.64205  |
| C | 1.29213  | 0.14885  | 4.43582  |
| O | 2.46677  | 0.12770  | 4.08381  |
| N | -0.01435 | -0.02120 | -0.69358 |
| C | 0.10164  | -1.23167 | -1.30681 |
| C | 0.48379  | -1.28789 | -2.65196 |
| C | 0.71151  | -0.11868 | -3.36401 |
| C | 0.50282  | 1.10015  | -2.73403 |
| C | 0.12019  | 1.14247  | -1.38863 |
| C | -0.27705 | 3.87826  | -1.53104 |
| C | -1.07711 | 3.80381  | -2.68460 |
| C | -1.43445 | 4.93350  | -3.41885 |
| C | -1.01540 | 6.21006  | -3.03230 |
| C | -0.25399 | 6.30941  | -1.86348 |
| C | 0.09481  | 5.17546  | -1.13210 |
| C | -1.36414 | 7.42835  | -3.84498 |
| H | 1.02647  | 0.18961  | 5.50892  |
| H | -2.31893 | 4.22971  | -0.09333 |
| H | 0.66256  | 2.02905  | -3.26947 |

|   |          |          |          |
|---|----------|----------|----------|
| H | -2.48179 | -1.11647 | 3.21269  |
| H | 0.62849  | -2.25365 | -3.12247 |
| H | 0.64756  | 5.31602  | -0.20638 |
| H | 1.04283  | -0.15684 | -4.39928 |
| H | 3.32907  | -1.25735 | 2.41534  |
| H | -1.50360 | -3.00809 | -2.80881 |
| H | 2.40868  | -4.25082 | -0.55224 |
| H | -2.13409 | -5.06219 | -3.96738 |
| H | -0.03458 | -7.37112 | -1.02769 |
| H | 0.57855  | -5.32430 | 0.14681  |
| H | 2.46755  | 4.17530  | -0.83589 |
| H | -1.45310 | 2.83840  | -3.01365 |
| H | 4.44700  | -3.40481 | 1.08103  |
| H | 3.34751  | 1.37098  | 2.32273  |
| H | -2.37100 | -4.19614 | 0.20291  |
| H | -3.80643 | 3.55033  | 2.11068  |
| H | 0.06116  | 7.29031  | -1.51250 |
| H | -3.83844 | -3.35738 | 2.36517  |
| H | -2.05650 | 4.82071  | -4.30480 |
| H | 4.49555  | 3.40884  | 0.84868  |
| H | -0.70013 | -7.90718 | -4.08056 |
| H | -2.41324 | -7.53421 | -3.88476 |
| H | -1.56503 | -8.49019 | -2.65813 |
| H | -1.45978 | 8.31773  | -3.21458 |
| H | -2.30519 | 7.29330  | -4.38669 |
| H | -0.58769 | 7.64124  | -4.59043 |
| H | -2.47690 | 1.35796  | 3.11362  |

ScH final product **4-H**

|    |          |          |         |
|----|----------|----------|---------|
| Sc | 11.67243 | 5.23640  | 6.69306 |
| O  | 13.00013 | 3.56231  | 7.30802 |
| O  | 12.04764 | 4.79940  | 8.85614 |
| N  | 13.40399 | 5.62569  | 5.37019 |
| N  | 13.61885 | 6.82761  | 4.79123 |
| N  | 12.29795 | 7.27874  | 7.44959 |
| N  | 12.68507 | 8.30116  | 6.65079 |
| N  | 10.59477 | 6.57456  | 5.04847 |
| N  | 9.55285  | 5.09128  | 7.48571 |
| N  | 8.45703  | 4.94623  | 6.70352 |
| N  | 10.88121 | 3.63027  | 5.39305 |
| N  | 9.65127  | 3.68786  | 4.83622 |
| C  | 14.36112 | 4.79387  | 4.93551 |
| H  | 14.39430 | 3.77767  | 5.29857 |
| C  | 15.20757 | 5.45736  | 4.04899 |
| H  | 16.06859 | 5.06471  | 3.52952 |
| C  | 14.69992 | 6.74680  | 3.98920 |
| H  | 15.04049 | 7.60841  | 3.43731 |
| C  | 12.17308 | 7.77263  | 8.69183 |
| H  | 11.90448 | 7.11363  | 9.50389 |
| C  | 12.45344 | 9.13799  | 8.69932 |
| H  | 12.44039 | 9.81681  | 9.53868 |
| C  | 12.76250 | 9.43132  | 7.37762 |
| H  | 13.02523 | 10.36863 | 6.91214 |
| C  | 13.40847 | 9.32085  | 4.30328 |
| C  | 14.52165 | 10.00113 | 4.83065 |
| H  | 14.89177 | 9.74160  | 5.81968 |
| C  | 15.20529 | 10.98191 | 4.11430 |
| H  | 16.05917 | 11.48011 | 4.56975 |
| C  | 14.82310 | 11.32529 | 2.81383 |

|   |          |          |         |
|---|----------|----------|---------|
| C | 13.74777 | 10.62775 | 2.25531 |
| H | 13.44273 | 10.84524 | 1.23338 |
| C | 13.06562 | 9.65207  | 2.98063 |
| H | 12.25439 | 9.12099  | 2.48905 |
| C | 15.53610 | 12.40767 | 2.04788 |
| H | 15.06470 | 13.38472 | 2.21276 |
| H | 15.51599 | 12.21651 | 0.97058 |
| H | 16.58191 | 12.49638 | 2.35736 |
| C | 11.14543 | 7.78208  | 4.73917 |
| C | 10.33219 | 8.81394  | 4.25675 |
| H | 10.77055 | 9.78720  | 4.06807 |
| C | 8.97541  | 8.60464  | 4.05999 |
| H | 8.33094  | 9.41385  | 3.72399 |
| C | 8.46104  | 7.33745  | 4.28994 |
| H | 7.40860  | 7.13437  | 4.12855 |
| C | 9.28720  | 6.31353  | 4.76733 |
| C | 3.73530  | 3.11254  | 2.17035 |
| H | 3.44030  | 2.09545  | 2.44661 |
| H | 3.89187  | 3.13828  | 1.08775 |
| H | 2.88357  | 3.76802  | 2.39140 |
| C | 4.96627  | 3.55287  | 2.91679 |
| C | 5.22508  | 3.10817  | 4.21728 |
| H | 4.54432  | 2.39946  | 4.68544 |
| C | 6.34799  | 3.54490  | 4.91764 |
| H | 6.52456  | 3.13113  | 5.90762 |
| C | 7.26593  | 4.46238  | 4.37351 |
| C | 7.01034  | 4.86397  | 3.05070 |
| H | 7.71212  | 5.52327  | 2.54607 |
| C | 5.89243  | 4.42765  | 2.34128 |
| H | 5.74135  | 4.76883  | 1.31882 |

|   |          |         |         |
|---|----------|---------|---------|
| C | 9.11892  | 5.32647 | 8.73454 |
| H | 9.83330  | 5.43792 | 9.53656 |
| C | 7.72600  | 5.36405 | 8.76296 |
| H | 7.08067  | 5.53205 | 9.61198 |
| C | 7.35008  | 5.12872 | 7.44692 |
| H | 6.37063  | 5.08638 | 6.99628 |
| C | 11.46350 | 2.50149 | 4.96446 |
| H | 12.45154 | 2.24160 | 5.31351 |
| C | 10.60733 | 1.81630 | 4.10413 |
| H | 10.78275 | 0.88066 | 3.59506 |
| C | 9.46735  | 2.60477 | 4.05399 |
| H | 8.54042  | 2.46248 | 3.52154 |
| C | 12.79793 | 3.83897 | 8.52452 |
| H | 13.28346 | 3.23311 | 9.30623 |
| B | 12.71506 | 8.08114 | 5.08665 |
| B | 8.64209  | 4.85688 | 5.13679 |

ScMe CO<sub>2</sub> insertion adduct

79

|   |         |          |          |
|---|---------|----------|----------|
| C | 3.79911 | 2.85121  | 0.46051  |
| C | 2.74039 | 3.28694  | -0.32609 |
| N | 1.64749 | 2.55761  | -0.03285 |
| N | 1.96712 | 1.62936  | 0.89958  |
| C | 3.25789 | 1.81162  | 1.21501  |
| B | 0.22632 | 2.49896  | -0.73757 |
| C | 0.27142 | 1.07239  | -1.54226 |
| N | 0.11756 | -0.08967 | -0.85311 |
| C | 0.19295 | -1.29786 | -1.47208 |
| C | 0.53849 | -1.35852 | -2.82771 |
| C | 0.77468 | -0.19082 | -3.54017 |

|    |          |          |          |
|----|----------|----------|----------|
| C  | 0.61827  | 1.03002  | -2.89817 |
| Sc | 0.57586  | -0.03888 | 1.49999  |
| N  | 1.85245  | -1.82839 | 1.00337  |
| N  | 1.47382  | -2.78205 | 0.12009  |
| C  | 2.51749  | -3.59449 | -0.13065 |
| C  | 3.60201  | -3.18695 | 0.63577  |
| C  | 3.12879  | -2.07642 | 1.33266  |
| B  | 0.05754  | -2.67073 | -0.58787 |
| C  | -0.31879 | -4.01531 | -1.41377 |
| C  | -1.15390 | -3.97751 | -2.54396 |
| C  | -1.58868 | -5.13413 | -3.18933 |
| C  | -1.21565 | -6.40160 | -2.73234 |
| C  | -0.41887 | -6.46157 | -1.58456 |
| C  | 0.00684  | -5.30054 | -0.94187 |
| C  | -1.64812 | -7.65182 | -3.45095 |
| C  | 1.08209  | 0.01223  | 3.66172  |
| N  | -0.99695 | -1.59119 | 1.50873  |
| N  | -1.03567 | -2.54279 | 0.54755  |
| C  | -2.10771 | -3.33508 | 0.75702  |
| C  | -2.78302 | -2.89284 | 1.88471  |
| C  | -2.04027 | -1.79719 | 2.32269  |
| N  | -0.89045 | 1.61098  | 1.41475  |
| N  | -0.87280 | 2.50441  | 0.39920  |
| C  | -1.89951 | 3.36618  | 0.55476  |
| C  | -2.60171 | 3.02985  | 1.70263  |
| C  | -1.92261 | 1.92249  | 2.20903  |
| C  | -0.06152 | 3.81895  | -1.63550 |
| C  | 0.34053  | 5.10350  | -1.22403 |
| C  | -0.00500 | 6.25486  | -1.92881 |
| C  | -0.79351 | 6.18706  | -3.08208 |

|   |          |          |          |
|---|----------|----------|----------|
| C | -1.24195 | 4.92420  | -3.47970 |
| C | -0.88727 | 3.77651  | -2.77203 |
| C | -1.13919 | 7.42430  | -3.86705 |
| H | -2.06067 | 4.16277  | -0.15398 |
| H | 0.79208  | 1.95688  | -3.43322 |
| H | -2.19570 | -1.15899 | 3.18155  |
| H | 0.64847  | -2.32483 | -3.30704 |
| H | 0.91650  | 5.21911  | -0.30886 |
| H | 1.07534  | -0.23161 | -4.58477 |
| H | 3.63174  | -1.45237 | 2.05845  |
| H | -1.49519 | -3.01844 | -2.92508 |
| H | 2.42716  | -4.40484 | -0.83719 |
| H | -2.23539 | -5.04925 | -4.06065 |
| H | -0.13708 | -7.43172 | -1.17941 |
| H | 0.58474  | -5.40719 | -0.02686 |
| H | 2.69992  | 4.06319  | -1.07432 |
| H | -1.28562 | 2.82279  | -3.10840 |
| H | 4.58270  | -3.63591 | 0.68050  |
| H | 3.72241  | 1.19545  | 1.97246  |
| H | -2.31690 | -4.16198 | 0.09752  |
| H | -3.47254 | 3.52172  | 2.10877  |
| H | 0.33408  | 7.22466  | -1.56921 |
| H | -3.67767 | -3.30982 | 2.32168  |
| H | -1.88480 | 4.83622  | -4.35355 |
| H | 4.80689  | 3.23756  | 0.48125  |
| H | -1.75700 | -8.49436 | -2.76117 |
| H | -0.91161 | -7.94639 | -4.20906 |
| H | -2.60315 | -7.50883 | -3.96555 |
| H | -1.22387 | 8.30131  | -3.21791 |
| H | -2.08510 | 7.30712  | -4.40437 |



|   |          |          |          |
|---|----------|----------|----------|
| H | -0.36657 | 7.64719  | -4.61360 |
| O | -2.17353 | 0.18676  | 5.58435  |
| C | -1.41579 | 0.22376  | 6.47463  |
| O | -0.67736 | 0.26182  | 7.37589  |
| H | -2.11501 | 1.34574  | 3.10309  |
| H | 0.63710  | -0.83608 | 4.20422  |
| H | 2.16561  | -0.04112 | 3.85446  |
| H | 0.73482  | 0.94059  | 4.14060  |

ScMe CO<sub>2</sub> insertion **TS<sub>2-Me</sub>**

79

|    |         |          |         |
|----|---------|----------|---------|
| C  | 7.84234 | 6.08898  | 5.92649 |
| C  | 6.92036 | 6.42542  | 4.94255 |
| N  | 5.81403 | 5.67896  | 5.10438 |
| N  | 5.99455 | 4.82982  | 6.14527 |
| C  | 7.21161 | 5.08732  | 6.65828 |
| B  | 4.53402 | 5.56474  | 4.18212 |
| C  | 4.68906 | 4.14363  | 3.38611 |
| N  | 4.46357 | 2.98056  | 4.05872 |
| C  | 4.45784 | 1.78700  | 3.40893 |
| C  | 4.78497 | 1.73518  | 2.04748 |
| C  | 5.14664 | 2.89075  | 1.37131 |
| C  | 5.08685 | 4.10212  | 2.04578 |
| Sc | 4.73496 | 3.00936  | 6.46959 |
| N  | 6.19128 | 1.42385  | 5.66258 |
| N  | 5.80052 | 0.37097  | 4.90423 |
| C  | 6.88836 | -0.31922 | 4.50337 |
| C  | 8.02020 | 0.27688  | 5.03646 |
| C  | 7.52600 | 1.36651  | 5.75489 |
| B  | 4.35430 | 0.39711  | 4.26708 |

|   |         |          |         |
|---|---------|----------|---------|
| C | 4.01984 | -0.94763 | 3.42762 |
| C | 3.13684 | -0.93419 | 2.33419 |
| C | 2.74404 | -2.10102 | 1.67988 |
| C | 3.21147 | -3.35295 | 2.09079 |
| C | 4.06055 | -3.38981 | 3.20176 |
| C | 4.44338 | -2.21963 | 3.85449 |
| C | 2.82411 | -4.61163 | 1.36119 |
| C | 5.95441 | 2.40094  | 8.38994 |
| N | 3.31854 | 1.33864  | 6.44734 |
| N | 3.28717 | 0.43961  | 5.43682 |
| C | 2.25881 | -0.40840 | 5.63982 |
| C | 1.60484 | -0.05852 | 6.81300 |
| C | 2.31334 | 1.04267  | 7.28562 |
| N | 3.08572 | 4.48928  | 6.00686 |
| N | 3.25769 | 5.47204  | 5.09446 |
| C | 2.11839 | 6.18808  | 4.98644 |
| C | 1.17421 | 5.65830  | 5.85074 |
| C | 1.83236 | 4.59544  | 6.46798 |
| C | 4.34314 | 6.90711  | 3.28548 |
| C | 4.63339 | 8.18068  | 3.81027 |
| C | 4.36015 | 9.35699  | 3.11494 |
| C | 3.75879 | 9.32731  | 1.85305 |
| C | 3.41771 | 8.07428  | 1.33531 |
| C | 3.69773 | 6.90209  | 2.03599 |
| C | 3.49414 | 10.59256 | 1.08154 |
| H | 2.05524 | 7.02103  | 4.30468 |
| H | 5.35257 | 5.02523  | 1.54336 |
| H | 2.16499 | 1.63250  | 8.17937 |
| H | 4.80907 | 0.77637  | 1.54286 |
| H | 5.06298 | 8.26637  | 4.80543 |

|   |         |          |         |
|---|---------|----------|---------|
| H | 5.46469 | 2.84866  | 0.33201 |
| H | 8.06559 | 2.10507  | 6.32911 |
| H | 2.72577 | 0.01201  | 1.99037 |
| H | 6.78881 | -1.17597 | 3.85551 |
| H | 2.05747 | -2.03722 | 0.83778 |
| H | 4.41838 | -4.34978 | 3.56939 |
| H | 5.06824 | -2.30879 | 4.74034 |
| H | 6.98235 | 7.14890  | 4.14428 |
| H | 3.37624 | 5.95948  | 1.60170 |
| H | 9.04735 | -0.03468 | 4.92158 |
| H | 7.55049 | 4.54801  | 7.53064 |
| H | 2.06167 | -1.20875 | 4.94489 |
| H | 0.16201 | 5.99780  | 6.01035 |
| H | 4.60722 | 10.31558 | 3.56747 |
| H | 0.74640 | -0.54027 | 7.25591 |
| H | 2.91624 | 8.01294  | 0.37120 |
| H | 8.81946 | 6.51845  | 6.08799 |
| H | 2.76478 | -5.46763 | 2.04050 |
| H | 3.56104 | -4.86233 | 0.58791 |
| H | 1.85539 | -4.50510 | 0.86384 |
| H | 3.33597 | 11.44435 | 1.74998 |
| H | 2.61217 | 10.49526 | 0.44107 |
| H | 4.34135 | 10.84319 | 0.43087 |
| O | 3.54951 | 3.74648  | 8.56776 |
| C | 4.52235 | 4.16979  | 9.11614 |
| O | 5.20748 | 4.82979  | 9.79783 |
| H | 1.46880 | 3.91362  | 7.22134 |
| H | 5.69231 | 1.35607  | 8.15580 |
| H | 7.02928 | 2.50941  | 8.20683 |
| H | 5.84351 | 2.46216  | 9.47921 |

ScMe CO2 insertion product **4-Me**

79

|    |          |          |          |
|----|----------|----------|----------|
| C  | -0.99684 | 3.86270  | -2.85454 |
| C  | -0.19517 | 3.92715  | -1.70169 |
| C  | 0.19194  | 5.22012  | -1.30294 |
| C  | -0.14211 | 6.35810  | -2.03473 |
| C  | -0.90424 | 6.26783  | -3.20389 |
| C  | -1.33987 | 4.99663  | -3.58927 |
| B  | 0.07204  | 2.62392  | -0.77448 |
| N  | -1.05919 | 2.63716  | 0.32168  |
| N  | -1.09699 | 1.74643  | 1.33924  |
| C  | -2.13616 | 2.06263  | 2.12452  |
| C  | -2.80036 | 3.17283  | 1.60334  |
| C  | -2.08283 | 3.50480  | 0.46338  |
| Sc | 0.34467  | 0.10699  | 1.46165  |
| O  | 0.65079  | 0.17777  | 3.41143  |
| C  | 0.01990  | 0.23280  | 4.56381  |
| O  | -1.20098 | 0.25686  | 4.66913  |
| C  | -1.23720 | 7.49004  | -4.01730 |
| N  | 1.47294  | 2.69620  | -0.02458 |
| C  | 2.56874  | 3.43517  | -0.27865 |
| C  | 3.60176  | 3.01228  | 0.54843  |
| C  | 3.04303  | 1.96911  | 1.28465  |
| N  | 1.76699  | 1.77323  | 0.92155  |
| C  | 0.15570  | 1.18411  | -1.55322 |
| N  | 0.00672  | 0.02493  | -0.85368 |
| C  | 0.11311  | -1.18910 | -1.46160 |
| C  | 0.48830  | -1.25464 | -2.80848 |
| C  | 0.72211  | -0.09094 | -3.52729 |

|   |          |          |          |
|---|----------|----------|----------|
| C | 0.53204  | 1.13231  | -2.90025 |
| B | -0.01631 | -2.56195 | -0.57581 |
| N | -1.14270 | -2.45622 | 0.52006  |
| N | -1.14898 | -1.48981 | 1.46694  |
| C | -2.19044 | -1.71715 | 2.27957  |
| C | -2.88764 | -2.84558 | 1.84843  |
| C | -2.18773 | -3.28270 | 0.73341  |
| N | 1.71043  | -1.64209 | 1.05068  |
| N | 1.38418  | -2.62299 | 0.17597  |
| C | 2.45493  | -3.41383 | -0.02286 |
| C | 3.50321  | -2.96452 | 0.77040  |
| C | 2.98044  | -1.85190 | 1.42707  |
| C | -0.32937 | -3.92106 | -1.40355 |
| C | -1.13693 | -3.91545 | -2.55428 |
| C | -1.52018 | -5.08846 | -3.20261 |
| C | -1.12111 | -6.34139 | -2.72784 |
| C | -0.35363 | -6.37027 | -1.55914 |
| C | 0.02072  | -5.19311 | -0.91390 |
| C | -1.49740 | -7.60831 | -3.44866 |
| C | 0.93210  | 0.26471  | 5.77036  |
| H | -2.23009 | 4.30160  | -0.24845 |
| H | 0.70282  | 2.05713  | -3.43931 |
| H | -2.34799 | -1.07125 | 3.13397  |
| H | 0.62435  | -2.22362 | -3.27493 |
| H | 0.74439  | 5.35461  | -0.37603 |
| H | 1.04681  | -0.13669 | -4.56439 |
| H | 3.44600  | -1.19974 | 2.15314  |
| H | -1.49882 | -2.96983 | -2.94981 |
| H | 2.40841  | -4.23930 | -0.71589 |
| H | -2.14746 | -5.02821 | -4.09000 |

|   |          |          |          |
|---|----------|----------|----------|
| H | -0.05469 | -7.32896 | -1.13930 |
| H | 0.57529  | -5.27768 | 0.01764  |
| H | 2.54931  | 4.20823  | -1.03091 |
| H | -1.38636 | 2.90240  | -3.18250 |
| H | 4.49262  | -3.38760 | 0.85618  |
| H | 3.48658  | 1.35804  | 2.05867  |
| H | -2.36033 | -4.12750 | 0.08582  |
| H | -3.67277 | 3.67122  | 1.99811  |
| H | 0.18455  | 7.33518  | -1.68355 |
| H | -3.77013 | -3.28837 | 2.28484  |
| H | -1.96413 | 4.89129  | -4.47457 |
| H | 4.60437  | 3.40832  | 0.60506  |
| H | -1.59780 | -8.44971 | -2.75624 |
| H | -0.73363 | -7.88460 | -4.18640 |
| H | -2.44324 | -7.49741 | -3.98752 |
| H | -1.32736 | 8.37987  | -3.38670 |
| H | -2.17693 | 7.36444  | -4.56351 |
| H | -0.45520 | 7.69607  | -4.75892 |
| H | -2.31523 | 1.48857  | 3.02468  |
| H | 1.56645  | -0.62714 | 5.77726  |
| H | 1.59505  | 1.13339  | 5.70904  |
| H | 0.34701  | 0.30988  | 6.68901  |

ScMe eta2 coordination TS

79

|   |          |          |          |
|---|----------|----------|----------|
| C | 0.00668  | -5.27661 | -1.07004 |
| C | -0.34880 | -3.98999 | -1.51583 |
| C | -1.18438 | -3.94905 | -2.64559 |
| C | -1.58955 | -5.10203 | -3.31621 |
| C | -1.18524 | -6.36927 | -2.88613 |

|    |          |          |          |
|----|----------|----------|----------|
| C  | -0.38936 | -6.43383 | -1.73801 |
| B  | -0.00546 | -2.65576 | -0.65996 |
| N  | 1.40823  | -2.74539 | 0.05466  |
| N  | 1.75071  | -1.78907 | 0.94837  |
| C  | 3.02473  | -2.01223 | 1.30249  |
| C  | 3.53347  | -3.10914 | 0.60896  |
| C  | 2.47237  | -3.53527 | -0.18030 |
| Sc | 0.41992  | -0.04488 | 1.45281  |
| N  | -1.08857 | -1.63469 | 1.44532  |
| N  | -1.10552 | -2.57197 | 0.46801  |
| C  | -2.15932 | -3.39020 | 0.66689  |
| C  | -2.84220 | -2.97992 | 1.80251  |
| C  | -2.12626 | -1.87479 | 2.25989  |
| C  | -1.58503 | -7.61430 | -3.63207 |
| N  | -1.02504 | 1.60172  | 1.40565  |
| N  | -1.00794 | 2.51457  | 0.40574  |
| C  | -2.03527 | 3.37119  | 0.57995  |
| C  | -2.73497 | 3.01144  | 1.72258  |
| C  | -2.05691 | 1.89531  | 2.20993  |
| B  | 0.09607  | 2.53141  | -0.72124 |
| C  | 0.15727  | 1.11337  | -1.53949 |
| N  | 0.02748  | -0.06339 | -0.86621 |
| C  | 0.10959  | -1.26026 | -1.51065 |
| C  | 0.44635  | -1.29068 | -2.86889 |
| C  | 0.66534  | -0.10885 | -3.56224 |
| C  | 0.49505  | 1.09732  | -2.89767 |
| C  | -0.19377 | 3.85974  | -1.60551 |
| C  | -1.02222 | 3.82906  | -2.74065 |
| C  | -1.37833 | 4.98376  | -3.43593 |
| C  | -0.92937 | 6.24263  | -3.02630 |

|   |          |          |          |
|---|----------|----------|----------|
| C | -0.14011 | 6.29873  | -1.87306 |
| C | 0.20692  | 5.14026  | -1.18069 |
| C | -1.27605 | 7.48767  | -3.79832 |
| N | 1.51153  | 2.58277  | -0.00615 |
| C | 2.60496  | 3.32619  | -0.25781 |
| C | 3.64924  | 2.87747  | 0.54122  |
| C | 3.09925  | 1.81630  | 1.25851  |
| N | 1.81758  | 1.63406  | 0.90870  |
| O | 1.10771  | -0.03696 | 3.33735  |
| C | 0.40548  | -0.00737 | 4.44461  |
| C | 1.22805  | -0.00784 | 5.71351  |
| O | -0.82393 | 0.01852  | 4.46577  |
| H | -2.19808 | 4.18106  | -0.11333 |
| H | 0.65256  | 2.03593  | -3.41646 |
| H | -2.26751 | -1.25390 | 3.13372  |
| H | 0.56483  | -2.24718 | -3.36490 |
| H | 0.78153  | 5.24766  | -0.26379 |
| H | 0.96216  | -0.12749 | -4.60850 |
| H | 3.49798  | -1.38125 | 2.04167  |
| H | -1.55069 | -2.99122 | -3.00609 |
| H | 2.41218  | -4.34345 | -0.89243 |
| H | -2.23776 | -5.01461 | -4.18612 |
| H | -0.08490 | -7.40508 | -1.35239 |
| H | 0.58347  | -5.38894 | -0.15512 |
| H | 2.57533  | 4.12029  | -0.98753 |
| H | -1.42226 | 2.87918  | -3.08590 |
| H | 4.52232  | -3.53792 | 0.66971  |
| H | 3.54818  | 1.18427  | 2.01183  |
| H | -2.35093 | -4.21118 | -0.00547 |
| H | -3.60461 | 3.49605  | 2.13993  |



|   |          |          |          |
|---|----------|----------|----------|
| H | 0.19819  | 7.26489  | -1.50313 |
| H | -3.72558 | -3.42519 | 2.23451  |
| H | -2.02301 | 4.90450  | -4.30924 |
| H | 4.65376  | 3.26943  | 0.59305  |
| H | -2.53633 | -7.48010 | -4.15575 |
| H | -1.68608 | -8.47100 | -2.95869 |
| H | -0.83379 | -7.88129 | -4.38592 |
| H | -1.35935 | 8.35817  | -3.14033 |
| H | -2.22289 | 7.37611  | -4.33516 |
| H | -0.50457 | 7.71766  | -4.54389 |
| H | -2.22024 | 1.30084  | 3.09809  |
| H | 1.89842  | 0.85713  | 5.71836  |
| H | 0.58003  | 0.02065  | 6.58962  |
| H | 1.85598  | -0.90363 | 5.74467  |

ScMe final product **4-Me**

79

|    |         |          |         |
|----|---------|----------|---------|
| Sc | 3.74187 | 10.40085 | 5.38870 |
| O  | 4.52826 | 11.40401 | 3.59620 |
| O  | 2.38159 | 10.99927 | 3.74740 |
| N  | 5.53254 | 7.79818  | 5.41372 |
| N  | 2.34808 | 12.03946 | 7.80241 |
| N  | 3.04424 | 7.24165  | 5.44378 |
| N  | 5.03545 | 11.92105 | 6.35335 |
| N  | 4.02395 | 9.38202  | 7.53547 |
| N  | 2.63327 | 8.45549  | 5.00821 |
| N  | 4.87802 | 12.30372 | 7.63938 |
| N  | 5.44654 | 9.05734  | 4.93136 |
| N  | 2.18421 | 11.58303 | 6.53851 |
| C  | 4.67241 | 4.60829  | 5.53490 |

|   |          |          |          |
|---|----------|----------|----------|
| H | 4.15448  | 4.84957  | 4.60971  |
| C | 2.05912  | 6.34297  | 5.26011  |
| H | 2.18247  | 5.31892  | 5.57680  |
| C | 1.16793  | 12.48218 | 8.27451  |
| H | 1.08400  | 12.85716 | 9.28275  |
| C | 5.17543  | 3.31687  | 5.68356  |
| H | 5.00963  | 2.58413  | 4.89592  |
| C | 6.70248  | 7.25213  | 5.02339  |
| H | 6.95918  | 6.24332  | 5.30488  |
| C | 0.20744  | 12.34804 | 7.28055  |
| H | -0.83469 | 12.62562 | 7.33041  |
| C | 5.90312  | 2.95110  | 6.82002  |
| C | 7.39850  | 8.17959  | 4.26247  |
| H | 8.36522  | 8.05661  | 3.79794  |
| C | 0.98242  | 6.97498  | 4.65210  |
| H | 0.04305  | 6.53429  | 4.35387  |
| C | 4.82668  | 12.82870 | 12.17576 |
| H | 5.44289  | 12.41234 | 12.97052 |
| C | 3.26776  | 8.11109  | 9.88934  |
| H | 2.92142  | 7.61498  | 10.79324 |
| C | 5.83532  | 13.19935 | 7.95673  |
| H | 5.87791  | 13.63155 | 8.94380  |
| C | 4.61389  | 12.08770 | 11.01461 |
| H | 5.09157  | 11.11466 | 10.93240 |
| C | 6.08986  | 12.58692 | 5.86283  |
| H | 6.37805  | 12.44778 | 4.83178  |
| C | 3.65582  | 7.37475  | 8.78016  |
| H | 3.62776  | 6.29140  | 8.80245  |
| C | 3.34291  | 9.49429  | 9.82386  |
| H | 3.06637  | 10.09994 | 10.67929 |

|   |         |          |          |
|---|---------|----------|----------|
| C | 5.61500 | 5.22623  | 7.63056  |
| H | 5.84105 | 5.96266  | 8.39764  |
| C | 4.05313 | 8.02180  | 7.60423  |
| C | 6.12675 | 3.93881  | 7.78415  |
| H | 6.71660 | 3.69999  | 8.66723  |
| C | 3.82983 | 12.56555 | 9.94968  |
| C | 0.89793 | 11.78231 | 6.20983  |
| H | 0.55379 | 11.52020 | 5.22046  |
| C | 4.84649 | 5.60269  | 6.51477  |
| C | 3.31836 | 13.86655 | 10.10873 |
| H | 2.76793 | 14.33115 | 9.29419  |
| C | 6.56317 | 9.29518  | 4.22943  |
| H | 6.69021 | 10.24456 | 3.73128  |
| C | 1.39568 | 8.29911  | 4.51222  |
| H | 0.88626 | 9.14427  | 4.07397  |
| C | 3.52102 | 14.61167 | 11.26917 |
| H | 3.10043 | 15.61291 | 11.34286 |
| C | 6.63866 | 13.40922 | 6.84579  |
| H | 7.49087 | 14.06701 | 6.76519  |
| C | 6.41822 | 1.54819  | 7.00224  |
| H | 5.69300 | 0.92815  | 7.54407  |
| H | 7.34926 | 1.53366  | 7.57722  |
| H | 6.60599 | 1.06131  | 6.04043  |
| C | 3.74295 | 10.12708 | 8.64110  |
| C | 4.26933 | 14.10122 | 12.33435 |
| C | 3.36414 | 11.46283 | 3.08850  |
| C | 3.16053 | 12.03767 | 1.71612  |
| H | 3.92071 | 12.78989 | 1.49995  |
| H | 2.15858 | 12.45940 | 1.62255  |
| H | 3.26124 | 11.22922 | 0.98362  |

|   |         |          |          |
|---|---------|----------|----------|
| C | 4.46048 | 14.88680 | 13.60440 |
| H | 3.66872 | 14.66292 | 14.33035 |
| H | 4.43336 | 15.96475 | 13.41796 |
| H | 5.41521 | 14.64917 | 14.08355 |
| B | 3.71344 | 11.75920 | 8.54588  |
| B | 4.38759 | 7.13990  | 6.26908  |
